# Supplementary material for: Current Knowledge on Spinal Meningiomas—Surgical Treatment, Complications, and Outcomes: A Systematic Review and Meta-Analysis (Part 2)
Source: MDPI journal article supplement (doi:10.3390/cancers14246221), 2022-12-16
Supplement: s1 [file s1]

# Supplementary File S3: Figures and raw data Tables

**Table S1.** Baseline characteristics and study inclusion under each of the sections of this review.

| Title                                                                                                                                                                                                      | Study ID             | Location      | Overall, ROB score (6p) | Qualitative ROB | More information on the cohort                 | Epidemiology | Race | Histopathology | Genetics | Receptors | Tumor location | Presenting symptoms | Radiology | Surgical treatment | Intraoperative monitoring | Operative complications | Alternative treatment | Outcome and HRQOL | Recurrence |
|------------------------------------------------------------------------------------------------------------------------------------------------------------------------------------------------------------|----------------------|---------------|-------------------------|-----------------|------------------------------------------------|--------------|------|----------------|----------|-----------|----------------|---------------------|-----------|--------------------|---------------------------|-------------------------|-----------------------|-------------------|------------|
| Functional Outcome After Spinal Meningioma Surgery. A Nationwide Population-Based Study                                                                                                                    | Champaux-Depond 2022 | France        | 5                       | LOW             | Only adults (>18 years)                        | 1            | 0    | 0              | 0        | 0         | 0              | 1                   | 0         | 0                  | 0                         | 0                       | 0                     | 1                 | 0          |
| The impact of body mass index and height on risk for primary tumours of the spinal cord, spinal meninges, spinal and peripheral nerves in 1.7 million norwegian women and men: a prospective cohort study. | Gheorghiu 2022       | Norway        | 5                       | LOW             | Only patients aged between 18 and 80 years     | 1            | 0    | 0              | 0        | 0         | 0              | 0                   | 0         | 0                  | 0                         | 0                       | 0                     | 0                 | 0          |
| Clinical characteristics and long-term outcomes for patients who undergo cytoreductive surgery for thoracic meningiomas: a retrospective analysis.                                                         | Ampie 2021           | United States | 5                       | LOW             | Only thoracic spinal meningiomas were included | 1            | 0    | 1              | 0        | 0         | 1              | 1                   | 1         | 1                  | 1                         | 1                       | 1                     | 1                 | 1          |
| Correlations Among Consistency, Computed Tomography Values, and Histopathological Subtypes of Spinal Meningioma                                                                                            | Aoyama 2021          | Japan         | 6                       | LOW             |                                                | 1            | 0    | 1              | 0        | 0         | 1              | 0                   | 1         | 1                  | 0                         | 0                       | 0                     | 0                 | 1          |
| Spinal cord compression in relation to clinical symptoms in patients with spinal meningiomas                                                                                                               | Corell 2021          | Sweden        | 5                       | LOW             | Only adults (>18 years) were included          | 1            | 0    | 1              | 0        | 0         | 1              | 1                   | 0         | 1                  | 0                         | 1                       | 0                     | 1                 | 1          |
| Correlations between preoperative clinical factors and treatment outcome of spinal meningiomas - A retrospective study of a series of 31 cases                                                             | Davarski 2021        | Bulgaria      | 6                       | LOW             |                                                | 1            | 0    | 1              | 0        | 0         | 1              | 1                   | 0         | 1                  | 1                         | 1                       | 0                     | 1                 | 1          |

|                                                                                                                                |                           |               |   |     |                                                                     |   |   |   |   |   |   |   |   |   |   |   |   |   |   |
|--------------------------------------------------------------------------------------------------------------------------------|---------------------------|---------------|---|-----|---------------------------------------------------------------------|---|---|---|---|---|---|---|---|---|---|---|---|---|---|
| Clinical features and prognostic factors in spinal meningioma surgery from a multicenter study.                                | Kobayashi 2021            | Japan         | 6 | LOW |                                                                     | 1 | 0 | 1 | 0 | 0 | 1 | 1 | 1 | 1 | 1 | 1 | 1 | 1 | 1 |
| Clinical characteristics and management differences for grade II and III spinal meningiomas                                    | Krauss 2021               | United States | 5 | LOW | Only WHO II & III (n=17)<br>However some data on WHO I is presented | 1 | 0 | 1 | 0 | 0 | 0 | 0 | 0 | 1 | 0 | 1 | 1 | 1 | 1 |
| Long-Term Follow-Up and Predictors of Functional Outcome after Surgery for Spinal Meningiomas: A Population-Based Cohort Study | Pettersson-Segerlind 2021 | Sweden        | 6 | LOW | Only adults (>18 years) were included                               | 1 | 0 | 1 | 0 | 0 | 1 | 1 | 0 | 1 | 1 | 1 | 1 | 1 | 1 |
| Long-term outcomes of spinal meningioma resection with outer layer of dura preservation technique.                             | Saiwai 2021               | Japan         | 5 | LOW | Only WHO I and follow-up of 5 years at least                        | 1 | 0 | 1 | 0 | 0 | 1 | 0 | 0 | 1 | 0 | 1 | 0 | 0 | 1 |
| Surgical results of the resection of spinal meningioma with the inner layer of dura more than 10 years after surgery           | Tominaga 2021             | Japan         | 6 | LOW |                                                                     | 1 | 0 | 1 | 0 | 0 | 1 | 0 | 0 | 1 | 0 | 0 | 0 | 1 | 1 |
| Age at Diagnosis and Baseline Myelomalacia Sign Predict Functional Outcome After Spinal Meningioma Surgery                     | Wach 2021                 | Germany       | 6 | LOW |                                                                     | 1 | 0 | 1 | 0 | 0 | 1 | 1 | 1 | 1 | 1 | 1 | 0 | 1 | 1 |
| Spinal Meningiomas: Influence of Cord Compression and Radiological Features on Preoperative Functional Status and Outcome      | Baro 2021                 | Italy         | 5 | LOW | Only patients aged between 18 and 85 years were included            | 1 | 0 | 1 | 0 | 0 | 1 | 0 | 1 | 1 | 1 | 1 | 0 | 1 | 1 |
| Epidemiological features of meningiomas: a single Brazilian center's experience with 993 cases.                                | Colli 2021                | Brazil        | 6 | LOW |                                                                     | 1 | 0 | 1 | 0 | 0 | 0 | 0 | 0 | 0 | 0 | 0 | 0 | 0 | 0 |
| Functional outcome and morbidity after microsurgical resection of spinal meningiomas.                                          | Kilinc 2021               | Germany       | 6 | LOW |                                                                     | 1 | 0 | 1 | 0 | 0 | 1 | 1 | 0 | 1 | 1 | 1 | 0 | 1 | 1 |

|                                                                                                                                                                                    |                          |                              |   |     |                                                                                                       |   |   |   |   |   |   |   |   |   |   |   |   |   |   |
|------------------------------------------------------------------------------------------------------------------------------------------------------------------------------------|--------------------------|------------------------------|---|-----|-------------------------------------------------------------------------------------------------------|---|---|---|---|---|---|---|---|---|---|---|---|---|---|
| Characteristics of cases with and without calcification in spinal meningiomas.                                                                                                     | Kobayashi 2021           | Japan                        | 6 | LOW |                                                                                                       | 1 | 0 | 1 | 0 | 0 | 1 | 0 | 1 | 0 | 0 | 0 | 0 | 1 | 0 |
| Improvement in Quality of Life Following Surgical Resection of Benign Intradural Extramedullary Tumors: A Prospective Evaluation of Patient-Reported Outcomes.                     | Newman 2021              | United States                | 6 | LOW |                                                                                                       | 0 | 0 | 0 | 0 | 0 | 0 | 0 | 0 | 0 | 0 | 0 | 0 | 1 | 0 |
| Assessing the Utility of 18F-Fluorodeoxyglucose Positron Emission Tomography in the Differential Diagnosis Between Spinal Schwannomas and Meningiomas                              | Ono H. 2021              | Japan                        | 6 | LOW |                                                                                                       | 1 | 0 | 0 | 0 | 0 | 1 | 0 | 1 | 0 | 0 | 0 | 0 | 0 | 0 |
| Predictive Value of Heterogeneously Enhanced Magnetic Resonance Imaging Findings With Computed Tomography Evidence of Calcification for Severe Motor Deficits in Spinal Meningioma | Ono K. 2021              | Japan                        | 6 | LOW |                                                                                                       | 1 | 0 | 1 | 0 | 0 | 1 | 1 | 1 | 1 | 1 | 0 | 0 | 0 | 1 |
| Health-related quality of life and return to work after surgery for spinal meningioma: A population-based cohort study                                                             | Pettersson-Segerlin 2021 | Sweden                       | 5 | LOW |                                                                                                       | 0 | 0 | 0 | 0 | 0 | 0 | 0 | 0 | 0 | 0 | 0 | 0 | 1 | 0 |
| Epidemiology and survival of patients with spinal meningiomas: A SEER analysis                                                                                                     | Cao 2021                 | China (US population though) | 6 | LOW |                                                                                                       | 1 | 1 | 1 | 0 | 0 | 0 | 0 | 0 | 0 | 0 | 0 | 1 | 0 | 0 |
| Clinical features and surgical outcomes of high-grade spinal meningiomas: Report of 19 cases and literature review.                                                                | Han 2020                 | China                        | 5 | LOW | Focus on high grade spinal meningiomas (n=20), however some data on lower grade spinal meningiomas is | 1 | 0 | 1 | 0 | 0 | 1 | 1 | 0 | 1 | 1 | 1 | 1 | 1 | 1 |

|                                                                                                                                 |                  |                |   |     |                                                                                               |   |   |   |   |   |   |   |   |   |   |   |   |   |   |
|---------------------------------------------------------------------------------------------------------------------------------|------------------|----------------|---|-----|-----------------------------------------------------------------------------------------------|---|---|---|---|---|---|---|---|---|---|---|---|---|---|
|                                                                                                                                 |                  |                |   |     | mentioned to some extent.                                                                     |   |   |   |   |   |   |   |   |   |   |   |   |   |   |
| Functional outcome after surgical treatment of spinal meningioma.                                                               | Hohenberger 2020 | Germany        | 6 | LOW |                                                                                               | 1 | 0 | 1 | 0 | 0 | 1 | 1 | 0 | 1 | 1 | 1 | 0 | 1 | 1 |
| Spinal meningiomas: is Simpson grade II resection radical enough?                                                               | Voldřich 2020    | Czech Republic | 5 | LOW | Tumors treated by Simpson grade 3 excision (n=8) were excluded. Simpson grade 1 was not used. | 1 | 0 | 0 | 0 | 0 | 1 | 1 | 0 | 1 | 1 | 1 | 0 | 1 | 1 |
| Spinal meningiomas: Treatment outcome and long-term follow-up.                                                                  | Kwee 2020        | Netherlands    | 5 | LOW |                                                                                               | 1 | 0 | 1 | 0 | 0 | 1 | 1 | 0 | 1 | 1 | 1 | 1 | 1 | 1 |
| Differentiating between spinal schwannomas and meningiomas using MRI: A focus on cystic change.                                 | Lee 2020         | South Korea    | 6 | LOW |                                                                                               | 1 | 0 | 0 | 0 | 0 | 1 | 0 | 1 | 0 | 0 | 0 | 0 | 0 | 0 |
| Low recurrence after Simpson grade II resection of spinal benign meningiomas in a single-institute 10-year retrospective study. | Naito 2020       | Japan          | 5 | LOW | Only WHO I with a follow up of 2 years at least                                               | 1 | 0 | 0 | 0 | 0 | 1 | 0 | 0 | 1 | 0 | 0 | 0 | 1 | 1 |
| Comparative clinical and genomic analysis of neurofibromatosis type 2-associated cranial and spinal meningiomas.                | Pemov 2020       | United States  | 5 | LOW | Only NF2 patients were included                                                               | 1 | 0 | 0 | 0 | 0 | 0 | 0 | 0 | 0 | 0 | 0 | 0 | 0 | 0 |
| New Insights into Expression of Hormonal Receptors by Meningiomas.                                                              | Portet 2020      | France         | 6 | LOW |                                                                                               | 1 | 0 | 1 | 0 | 1 | 0 | 0 | 0 | 0 | 0 | 0 | 0 | 0 | 0 |
| Estrogen and progesterone receptor in meningiomas: An immunohistochemical analysis.                                             | Telugu 2020      | India          | 6 | LOW |                                                                                               | 0 | 0 | 0 | 1 | 1 | 0 | 0 | 0 | 0 | 0 | 0 | 0 | 0 | 0 |
| Differences and characteristics of symptoms by tumor location, size, and degree of spinal cord compression: a retrospective     | Yamaguchi 2020   | Japan          | 5 | LOW |                                                                                               | 1 | 0 | 1 | 0 | 0 | 1 | 1 | 0 | 0 | 0 | 0 | 0 | 0 | 0 |



|                                                                                                                                   |                |               |   |          |                                                 |   |   |   |   |   |   |   |   |   |   |   |   |   |   |
|-----------------------------------------------------------------------------------------------------------------------------------|----------------|---------------|---|----------|-------------------------------------------------|---|---|---|---|---|---|---|---|---|---|---|---|---|---|
| Survival in Patients with High-Grade Spinal Meningioma: An Analysis of the National Cancer Database.                              | Wright 2019    | United States | 5 | LOW      | Only WHO II & III and adult (>18 patients)      | 1 | 1 | 1 | 0 | 0 | 0 | 0 | 0 | 0 | 0 | 0 | 0 | 0 | 0 |
| Trends in the utilization of radiotherapy for spinal meningiomas: insights from the 2004-2015 National Cancer Database.           | Yolcu 2019     | United States | 5 | LOW      | Only patients with radiosurgery or radiotherapy | 0 | 0 | 0 | 0 | 0 | 0 | 0 | 0 | 0 | 0 | 0 | 1 | 0 | 0 |
| Spinal Meningiomas Prognostic Evaluation Score (SPES): predicting the neurological outcomes in spinal meningioma surgery.         | Fрати 2019     | Italy         | 6 | LOW      |                                                 | 1 | 0 | 0 | 0 | 0 | 0 | 0 | 0 | 0 | 0 | 0 | 0 | 0 | 0 |
| Clinical and prognostic features of spinal meningioma: a thorough analysis from a single neurosurgical center.                    | Hua 2018       | China         | 6 | LOW      |                                                 | 1 | 0 | 1 | 0 | 1 | 1 | 1 | 0 | 1 | 1 | 1 | 0 | 1 | 1 |
| Spinal meningiomas - Risks and potential of an increasing age at the time of surgery.                                             | Schwabe 2018   | Germany       | 5 | LOW      |                                                 | 1 | 0 | 1 | 0 | 0 | 1 | 1 | 1 | 1 | 1 | 1 | 1 | 1 | 1 |
| Spinal meningioma and factors predictive of post-operative deterioration.                                                         | Gilard 2018    | France        | 5 | LOW      | Only patients >18 years were included           | 1 | 0 | 1 | 0 | 0 | 1 | 1 | 0 | 1 | 0 | 1 | 0 | 1 | 1 |
| Preliminary algorithm for differential diagnosis between spinal meningioma and schwannoma using plain magnetic resonance imaging. | Iwata 2018     | Japan         | 6 | LOW      |                                                 | 1 | 0 | 0 | 0 | 0 | 0 | 0 | 1 | 0 | 0 | 0 | 0 | 0 | 0 |
| Surgical management of spinal meningiomas: focus on unilateral posterior approach and anterior localization.                      | Onken 2018     | Germany       | 4 | MODERATE | Laterally located tumors excluded               | 1 | 0 | 1 | 0 | 0 | 0 | 0 | 0 | 1 | 0 | 1 | 0 | 1 | 1 |
| Benefits of spinal meningioma resection                                                                                           | Santos 2018    | Brazil        | 6 | LOW      |                                                 | 1 | 0 | 1 | 0 | 0 | 1 | 1 | 0 | 1 | 0 | 1 | 0 | 1 | 0 |
| Differentiating spinal intradural-extramedullary schwannoma                                                                       | Takashima 2018 | Japan         | 6 | LOW      |                                                 | 1 | 0 | 0 | 0 | 0 | 1 | 0 | 1 | 0 | 0 | 0 | 0 | 0 | 0 |

|                                                                                                                       |              |                          |   |          |                                                                       |   |   |   |   |   |   |   |   |   |   |   |   |   |   |
|-----------------------------------------------------------------------------------------------------------------------|--------------|--------------------------|---|----------|-----------------------------------------------------------------------|---|---|---|---|---|---|---|---|---|---|---|---|---|---|
| from meningioma using MRI T(2) weighted images.                                                                       |              |                          |   |          |                                                                       |   |   |   |   |   |   |   |   |   |   |   |   |   |   |
| Surgical management of ventrally located spinal meningiomas via posterior approach.                                   | Notani 2017  | Japan                    | 5 | LOW      | Only ventral tumors                                                   | 1 | 0 | 0 | 0 | 0 | 0 | 0 | 0 | 1 | 1 | 1 | 0 | 1 | 1 |
| Clinical features and long-term outcomes of pediatric spinal meningiomas.                                             | Wu 2017      | China                    | 5 | LOW      | Only pediatric <18 years included and all NF2 patients were excluded. | 1 | 0 | 1 | 0 | 0 | 1 | 1 | 0 | 1 | 1 | 1 | 1 | 1 | 1 |
| Proposal of a new radiological classification system for spinal meningiomas as a descriptive tool and surgical guide. | Bayoumi 2017 | Turkey and United States | 6 | LOW      |                                                                       | 0 | 0 | 0 | 0 | 0 | 0 | 0 | 1 | 1 | 0 | 0 | 0 | 0 | 0 |
| Spinal meningioma: relationship between degree of cord compression and outcome.                                       | Davies 2017  | United Kingdom           | 6 | LOW      |                                                                       | 1 | 0 | 1 | 0 | 0 | 1 | 1 | 0 | 0 | 0 | 0 | 0 | 1 | 0 |
| Spinal intradural extramedullary tumors: the value of intraoperative neurophysiologic monitoring on surgical outcome. | Harel 2017   | Israel                   | 4 | Moderate | Mixed benign spinal tumors                                            | 0 | 0 | 0 | 0 | 0 | 0 | 0 | 0 | 1 | 1 | 0 | 0 | 0 | 0 |
| Factors Leading to a Poor Functional Outcome in Spinal Meningioma Surgery: Remarks on 173 Cases.                      | Raco 2017    | Italy                    | 6 | LOW      |                                                                       | 0 | 0 | 1 | 0 | 0 | 0 | 1 | 0 | 1 | 0 | 1 | 0 | 1 | 1 |
| Long-term recurrence rates after the removal of spinal meningiomas in relation to Simpson grades.                     | Kim 2016     | South Korea              | 5 | LOW      | Only Simpson Grade 2                                                  | 1 | 0 | 1 | 0 | 0 | 1 | 0 | 0 | 1 | 0 | 1 | 0 | 1 | 1 |
| Spinal meningiomas: clinicoradiological factors predicting recurrence and functional outcome.                         | Maiti 2016   | United States            | 6 | LOW      |                                                                       | 1 | 1 | 1 | 0 | 0 | 1 | 0 | 1 | 1 | 1 | 1 | 0 | 1 | 1 |
| Unilateral Laminectomy Approach for the Removal of Spinal Meningiomas and Schwannomas: Impact on Pain,                | Pompili 2016 | Italy                    | 5 | LOW      | Mixed intradural extramedullary tumors and only hemi-                 | 1 | 0 | 0 | 0 | 0 | 1 | 1 | 0 | 1 | 1 | 0 | 0 | 1 | 1 |

|                                                                                                                                                             |                  |                |   |          |                                                                                                     |   |   |   |   |   |   |   |   |   |   |   |   |   |   |
|-------------------------------------------------------------------------------------------------------------------------------------------------------------|------------------|----------------|---|----------|-----------------------------------------------------------------------------------------------------|---|---|---|---|---|---|---|---|---|---|---|---|---|---|
| Spinal Stability, and Neurologic Results.                                                                                                                   |                  |                |   |          | laminectomy approach                                                                                |   |   |   |   |   |   |   |   |   |   |   |   |   |   |
| Hemilaminectomy for spinal meningioma: A case series of 20 patients with a focus on ventral- and ventrolateral lesions.                                     | Tola 2016        | Italy          | 5 | LOW      | All patients were operated through a unilateral approach                                            | 1 | 0 | 1 | 0 | 0 | 1 | 1 | 0 | 1 | 1 | 1 | 0 | 1 | 1 |
| Clinical features and prognostic factors of WHO II and III adult spinal meningiomas: analysis of 25 cases in a single center.                               | Ye 2016          | China          | 5 | LOW      | Only WHO II & III (some data on WHO I is however mentioned). Only patients >18 years were included. | 1 | 0 | 1 | 0 | 0 | 1 | 1 | 0 | 1 | 0 | 1 | 1 | 1 | 1 |
| Spinal Cervical Meningiomas: The Challenge Posed by Ventral Location.                                                                                       | Lonjon 2016      | United Kingdom | 5 | LOW      | Only cervical                                                                                       | 1 | 0 | 1 | 0 | 0 | 1 | 1 | 0 | 1 | 1 | 1 | 1 | 1 | 1 |
| Improved patient quality of life following intradural extramedullary spinal tumor resection.                                                                | Viereck 2016     | United States  | 4 | Moderate | Mixed WHO 1 intradural extramedullary spinal tumors                                                 | 0 | 0 | 0 | 0 | 0 | 0 | 0 | 0 | 0 | 0 | 0 | 0 | 1 | 0 |
| Does Histologic Subtype Influence the Post-Operative Outcome in Spinal Meningioma?                                                                          | Zham 2016        | Iran           | 5 | LOW      |                                                                                                     | 1 | 0 | 1 | 0 | 0 | 0 | 0 | 0 | 1 | 0 | 0 | 0 | 1 | 0 |
| Surgical management of ventrally based lower cervical (subaxial) meningiomas through the lateral approach: Report on 16 cases.                              | Aboul-Enein 2015 | Egypt          | 5 | LOW      | Only cervical ventral                                                                               | 1 | 0 | 0 | 0 | 0 | 0 | 0 | 0 | 1 | 1 | 1 | 1 | 0 | 1 |
| Simpson Grade I-III Resection of Spinal Atypical (World Health Organization Grade II) Meningiomas is Associated With Symptom Resolution and Low Recurrence. | Sun 2015         | United States  | 5 | LOW      | Only WHO grade II atypical spinal meningiomas                                                       | 1 | 0 | 1 | 0 | 0 | 0 | 0 | 0 | 1 | 1 | 1 | 1 | 1 | 1 |
| Stereotactic radiotherapy for spinal meningiomas and neurinomas.                                                                                            | Golano v 2015    | Russia         | 4 | Moderate | Only patients with radiosurgery                                                                     | 1 | 0 | 0 | 0 | 0 | 1 | 0 | 0 | 0 | 0 | 0 | 1 | 1 | 0 |



|                                                                                                                                                           |               |               |   |          |                                                                            |   |   |   |   |   |   |   |   |   |   |   |   |   |   |
|-----------------------------------------------------------------------------------------------------------------------------------------------------------|---------------|---------------|---|----------|----------------------------------------------------------------------------|---|---|---|---|---|---|---|---|---|---|---|---|---|---|
| Outcome of surgical management spinal meningioma: a study of 48 cases                                                                                     | Haq 2015      | Pakistan      | 4 | MODERATE | Patients with severe comorbidities were excluded                           | 1 | 0 | 0 | 0 | 0 | 1 | 1 | 0 | 1 | 1 | 1 | 0 | 1 | 1 |
| Assessment of the treatment response of spinal meningiomas after radiosurgery focusing on serial MRI findings.                                            | Lee 2015      | South Korea   | 5 | LOW      | Only patients with radiosurgery                                            | 1 | 0 | 0 | 0 | 0 | 1 | 0 | 1 | 0 | 0 | 0 | 1 | 0 | 0 |
| Hemilaminectomy approach for intradural extramedullary spinal tumors: an analysis of 164 patients.                                                        | Turel 2015    | India         | 4 | MODERATE | Mixed intracranial/spinal, and only those with a hemilaminectomy performed | 0 | 0 | 0 | 0 | 0 | 0 | 0 | 0 | 1 | 1 | 0 | 0 | 0 | 0 |
| Complications and outcomes of surgery for spinal meningioma: a Nationwide Inpatient Sample analysis from 2003 to 2010.                                    | Ambekar 2014  | United States | 6 | LOW      |                                                                            | 1 | 1 | 0 | 0 | 0 | 0 | 0 | 0 | 0 | 0 | 1 | 0 | 0 | 0 |
| Is Simpson grade I removal necessary in all cases of spinal meningioma? Assessment of postoperative recurrence during long-term follow-up.                | Tsuda 2014    | Japan         | 5 | LOW      |                                                                            | 1 | 0 | 1 | 0 | 0 | 1 | 1 | 0 | 1 | 1 | 1 | 1 | 1 | 1 |
| Surgical management of spinal meningiomas: A retrospective case analysis based on preoperative surgical grade                                             | Arima 2014    | Japan         | 5 | LOW      | Lumbar tumors were excluded                                                | 1 | 0 | 0 | 0 | 0 | 1 | 0 | 1 | 1 | 0 | 0 | 0 | 1 | 1 |
| MRI diagnosis of intradural extramedullary tumors.                                                                                                        | Gu 2014       | China         | 6 | LOW      |                                                                            | 1 | 0 | 0 | 0 | 0 | 1 | 0 | 1 | 0 | 0 | 0 | 0 | 0 | 0 |
| Spinal meningiomas: surgical outcome and literature review.                                                                                               | Riad 2013     | France        | 6 | LOW      |                                                                            | 1 | 0 | 1 | 0 | 0 | 1 | 1 | 0 | 1 | 0 | 1 | 0 | 1 | 1 |
| Clinicopathological characteristics, hormone receptor status and matrix metallo-proteinase-9 (MMP-9) immunohistochemical expression in spinal meningiomas | Barresi 2012  | Italy         | 6 | LOW      |                                                                            | 1 | 0 | 1 | 0 | 1 | 1 | 0 | 0 | 1 | 0 | 0 | 0 | 0 | 1 |
| Long-term surgical outcomes of spinal meningiomas.                                                                                                        | Nakamura 2012 | Japan         | 5 | LOW      |                                                                            | 1 | 0 | 1 | 0 | 0 | 1 | 0 | 0 | 1 | 0 | 0 | 0 | 0 | 1 |

|                                                                                                                                                                                      |                  |               |   |            |                                                                        |   |   |   |   |   |   |   |   |   |   |   |   |   |   |
|--------------------------------------------------------------------------------------------------------------------------------------------------------------------------------------|------------------|---------------|---|------------|------------------------------------------------------------------------|---|---|---|---|---|---|---|---|---|---|---|---|---|---|
| Spinal meningioma in childhood: clinical features and treatment.                                                                                                                     | Wang 2012        | China         | 5 | LOW        | Only pediatric <18 included                                            | 1 | 0 | 1 | 0 | 1 | 1 | 1 | 1 | 1 | 0 | 0 | 1 | 0 | 1 |
| Minimally invasive surgery for benign intradural extramedullary spinal meningiomas: experience of a single institution in a cohort of elderly patients and review of the literature. | Iacoan geli 2012 | Italy         | 5 | LOW        | Only elderly (>68)                                                     | 1 | 0 | 1 | 0 | 0 | 1 | 1 | 0 | 1 | 1 | 1 | 0 | 1 | 0 |
| Radiosurgery of spinal meningiomas and schwannomas.                                                                                                                                  | Kufeld 2012      | Germ any      | 4 | MOD ERAT E | Only patients with radiosurgery                                        | 0 | 0 | 0 | 0 | 0 | 0 | 0 | 0 | 0 | 0 | 0 | 1 | 1 | 0 |
| Spinal meningiomas: age-related features.                                                                                                                                            | Maiuri 2011      | Italy         | 6 | LOW        |                                                                        | 1 | 0 | 1 | 0 | 1 | 1 | 0 | 0 | 1 | 0 | 0 | 0 | 0 | 1 |
| Spinal meningiomas: recurrence in ventrally located individuals on long-term follow-up; a review of 46 operated cases.                                                               | Postalci 2011    | Turkey        | 6 | LOW        |                                                                        | 1 | 0 | 1 | 0 | 0 | 1 | 1 | 0 | 1 | 0 | 1 | 0 | 1 | 1 |
| Posterior approach to ventrally located spinal meningiomas.                                                                                                                          | Voulgaris 2010   | Greece        | 5 | LOW        | Only ventral tumors                                                    | 1 | 0 | 1 | 1 | 0 | 1 | 0 | 0 | 1 | 1 | 0 | 0 | 0 | 1 |
| Clinical presentation, histology, and treatment in 430 patients with primary tumors of the spinal cord, spinal meninges, or cauda equina.                                            | Engelhardt 2010  | United States | 5 | LOW        | Mixed primary spinal cord tumors                                       | 1 | 0 | 0 | 0 | 0 | 0 | 1 | 0 | 0 | 0 | 0 | 1 | 0 | 0 |
| Spinal meningioma surgery in elderly patients with paraplegia or severe paraparesis: a multicenter study.                                                                            | Sacko 2009       | France        | 5 | LOW        | Only elderly (>70) with paralysis or severe paresis (grade 3 or 4 ASA) | 1 | 0 | 0 | 0 | 0 | 1 | 1 | 0 | 1 | 0 | 1 | 0 | 0 | 1 |
| Radiological findings of spinal schwannomas and meningiomas: focus on discrimination of two disease entities.                                                                        | Liu 2009         | South Korea   | 6 | LOW        |                                                                        | 1 | 0 | 0 | 0 | 0 | 1 | 0 | 1 | 0 | 0 | 0 | 0 | 0 | 0 |
| A less invasive surgical concept for the resection of spinal meningiomas.                                                                                                            | Boström 2008     | Germ any      | 6 | LOW        |                                                                        | 1 | 0 | 1 | 0 | 0 | 1 | 1 | 0 | 1 | 1 | 1 | 0 | 1 | 1 |

|                                                                                                                                                                                        |                  |                           |   |          |                                                                                       |   |   |   |   |   |   |   |   |   |   |   |   |   |   |
|----------------------------------------------------------------------------------------------------------------------------------------------------------------------------------------|------------------|---------------------------|---|----------|---------------------------------------------------------------------------------------|---|---|---|---|---|---|---|---|---|---|---|---|---|---|
| Spinal meningiomas: Clinical and therapeutic considerations                                                                                                                            | Schröder 2008    | Germany                   | 6 | LOW      |                                                                                       | 1 | 0 | 1 | 0 | 0 | 1 | 1 | 0 | 1 | 0 | 1 | 1 | 1 | 1 |
| Radiosurgery for benign intradural spinal tumors.                                                                                                                                      | Gerszten 2008    | United States             | 4 | Moderate | Only patients with radiosurgery                                                       | 1 | 0 | 0 | 0 | 0 | 1 | 0 | 0 | 0 | 0 | 0 | 1 | 0 | 0 |
| Spinal meningiomas: critical review of 131 surgically treated patients.                                                                                                                | Sandicioglu 2008 | Germany                   | 6 | LOW      |                                                                                       | 1 | 0 | 1 | 0 | 0 | 1 | 1 | 0 | 1 | 1 | 1 | 0 | 1 | 1 |
| Management of spinal meningiomas: surgical results and a review of the literature.                                                                                                     | Setzer 2007      | Germany and United States | 6 | LOW      |                                                                                       | 1 | 0 | 1 | 0 | 0 | 1 | 0 | 0 | 1 | 0 | 1 | 1 | 1 | 1 |
| Surgical outcome of spinal canal meningiomas                                                                                                                                           | Yoon 2007        | South Korea               | 5 | LOW      |                                                                                       | 1 | 0 | 1 | 0 | 0 | 1 | 0 | 0 | 1 | 0 | 1 | 1 | 1 | 1 |
| Meningothelioma as the predominant histological subtype of midline skull base and spinal meningioma.                                                                                   | Lee 2006         | United States             | 6 | LOW      |                                                                                       | 0 | 0 | 1 | 0 | 0 | 0 | 0 | 0 | 0 | 0 | 0 | 0 | 0 | 0 |
| Microarray-based analysis of spinal versus intracranial meningiomas: different clinical, biological, and genetic characteristics associated with distinct patterns of gene expression. | Sayagüés 2006    | Spain                     | 6 | LOW      |                                                                                       | 1 | 0 | 1 | 1 | 0 | 0 | 0 | 0 | 0 | 0 | 0 | 0 | 0 | 0 |
| Results of spinal meningioma surgery in patients with severe preoperative neurological deficits.                                                                                       | Haegelen 2005    | France                    | 5 | LOW      | Only patients with severe presenting symptoms (Grade 3 or 4 Levy Score) were included | 1 | 0 | 0 | 0 | 0 | 1 | 0 | 0 | 1 | 0 | 1 | 0 | 1 | 1 |
| Spinal meningiomas: Evaluation of 41 patients                                                                                                                                          | Peker 2005       | Turkey                    | 5 | LOW      |                                                                                       | 1 | 0 | 1 | 0 | 0 | 1 | 1 | 1 | 1 | 0 | 0 | 0 | 1 | 1 |
| Spinal meningioma: relationship between histological subtypes and surgical outcome?                                                                                                    | Schaller 2005    | Switzerland               | 6 | LOW      |                                                                                       | 1 | 0 | 1 | 0 | 0 | 1 | 1 | 0 | 1 | 0 | 0 | 1 | 1 | 1 |

|                                                                                                                                                                                   |                   |               |   |     |                            |   |   |   |   |   |   |   |   |   |   |   |   |   |   |
|-----------------------------------------------------------------------------------------------------------------------------------------------------------------------------------|-------------------|---------------|---|-----|----------------------------|---|---|---|---|---|---|---|---|---|---|---|---|---|---|
| MR imaging features of spinal schwannomas and meningiomas.                                                                                                                        | De Verdelhan 2005 | France        | 6 | LOW |                            | 1 | 0 | 0 | 0 | 0 | 1 | 0 | 1 | 0 | 0 | 0 | 0 | 0 | 0 |
| Results in the operative treatment of elderly patients with spinal meningiomas.                                                                                                   | Morandi 2004      | France        | 5 | LOW | Only elderly (>70)         | 1 | 0 | 1 | 0 | 0 | 1 | 0 | 0 | 1 | 0 | 1 | 0 | 1 | 1 |
| Detection of chromosomal imbalances in spinal meningiomas by comparative genomic hybridization.                                                                                   | Arslan tas 2003   | Turkey        | 5 | LOW | Only adults (>18)          | 1 | 0 | 1 | 1 | 0 | 1 | 0 | 0 | 0 | 0 | 0 | 0 | 0 | 1 |
| Approaches and surgical results in the treatment of ventral thoracic meningiomas. Review of our experience with a posterolateral combined transpedicular-transarticular approach. | Gambardella 2003  | Italy         | 5 | LOW | Only thoracic ventral      | 1 | 0 | 0 | 0 | 0 | 0 | 1 | 0 | 1 | 0 | 1 | 0 | 1 | 1 |
| Spinal meningiomas in patients younger than 50 years of age: a 21-year experience.                                                                                                | Cohen-Gadol 2003  | United States | 6 | LOW |                            | 1 | 0 | 1 | 0 | 0 | 1 | 1 | 0 | 0 | 0 | 1 | 0 | 1 | 1 |
| Recurrence of benign spinal neoplasms.                                                                                                                                            | Schick 2001       | Germany       | 5 | LOW | Mixed benign spinal tumors | 1 | 0 | 0 | 0 | 0 | 0 | 0 | 0 | 1 | 0 | 0 | 0 | 0 | 1 |
| Review of 36 cases of spinal cord meningioma.                                                                                                                                     | Gezen 2000        | Turkey        | 6 | LOW |                            | 1 | 0 | 1 | 0 | 0 | 1 | 1 | 0 | 1 | 0 | 1 | 1 | 1 | 1 |

Each study was included in at least one of the sections in this review (1 = study included, 0 = study not included), ROB = Risk of Bias, HRQOL = Health-related quality of life, WHO = World Health Organization, NF2 = Neurofibromatosis 2

**Table S2.** Risk of bias assessment

| Study ID              | Representativeness of intervention group (1p) | Ascertainment of exposure (1p) | Demonstration that outcome of interest was not present at start of study (1p) | Assessment of outcome (1p) | Was follow-up long enough for outcomes to occur (1p) | Adequacy of follow up of cohorts (1p) | Overall ROB score (6p) | Qualitative ROB | OCEBM | Individual quality Score (IQS) |
|-----------------------|-----------------------------------------------|--------------------------------|-------------------------------------------------------------------------------|----------------------------|------------------------------------------------------|---------------------------------------|------------------------|-----------------|-------|--------------------------------|
| Gheorghiu 2022        | 0                                             | 1                              | 1                                                                             | 1                          | 1                                                    | 1                                     | 5                      | LOW             | I     | 1                              |
| Champeaux-Depond 2022 | 0                                             | 1                              | 1                                                                             | 1                          | 1                                                    | 1                                     | 5                      | LOW             | II    | 1                              |
| Newman 2021           | 1                                             | 1                              | 1                                                                             | 1                          | 1                                                    | 1                                     | 6                      | LOW             | I     | 1                              |
| Aoyama 2021           | 1                                             | 1                              | 1                                                                             | 1                          | 1                                                    | 1                                     | 6                      | LOW             | III   | 2                              |
| Krauss 2021           | 0                                             | 1                              | 1                                                                             | 1                          | 1                                                    | 1                                     | 5                      | LOW             | III   | 2                              |
| Ampie 2021            | 0                                             | 1                              | 1                                                                             | 1                          | 1                                                    | 1                                     | 5                      | LOW             | II    | 1                              |
| Baro 2021             | 0                                             | 1                              | 1                                                                             | 1                          | 1                                                    | 1                                     | 5                      | LOW             | II    | 1                              |
| Cao 2021              | 1                                             | 1                              | 1                                                                             | 1                          | 1                                                    | 1                                     | 6                      | LOW             | II    | 1                              |
| Colli 2021            | 1                                             | 1                              | 1                                                                             | 1                          | 1                                                    | 1                                     | 6                      | LOW             | II    | 1                              |
| Corell 2021           | 0                                             | 1                              | 1                                                                             | 1                          | 1                                                    | 1                                     | 5                      | LOW             | II    | 1                              |
| Davarski 2021         | 1                                             | 1                              | 1                                                                             | 1                          | 1                                                    | 1                                     | 6                      | LOW             | II    | 1                              |
| Kilinc 2021           | 1                                             | 1                              | 1                                                                             | 1                          | 1                                                    | 1                                     | 6                      | LOW             | II    | 1                              |
| Kobayashi 2021        | 1                                             | 1                              | 1                                                                             | 1                          | 1                                                    | 1                                     | 6                      | LOW             | II    | 1                              |

|                           |   |   |   |   |   |   |   |     |    |   |
|---------------------------|---|---|---|---|---|---|---|-----|----|---|
| Kobayashi 2021            | 1 | 1 | 1 | 1 | 1 | 1 | 6 | LOW | II | 1 |
| Ono H. 2021               | 1 | 1 | 1 | 1 | 1 | 1 | 6 | LOW | II | 1 |
| Ono K. 2021               | 1 | 1 | 1 | 1 | 1 | 1 | 6 | LOW | II | 1 |
| Pettersson-Segerlind 2021 | 1 | 1 | 1 | 1 | 1 | 1 | 6 | LOW | II | 1 |
| Pettersson-Segerlind 2021 | 0 | 1 | 1 | 1 | 1 | 1 | 5 | LOW | II | 1 |
| Saiwai 2021               | 0 | 1 | 1 | 1 | 1 | 1 | 5 | LOW | II | 1 |
| Tominaga 2021             | 1 | 1 | 1 | 1 | 1 | 1 | 6 | LOW | II | 1 |
| Wach 2021                 | 1 | 1 | 1 | 1 | 1 | 1 | 6 | LOW | II | 1 |
| Han 2020                  | 0 | 1 | 1 | 1 | 1 | 1 | 5 | LOW | II | 1 |
| Hohenberger 2020          | 1 | 1 | 1 | 1 | 1 | 1 | 6 | LOW | II | 1 |
| Kwee 2020                 | 1 | 1 | 1 | 1 | 0 | 1 | 5 | LOW | II | 1 |
| Lee 2020                  | 1 | 1 | 1 | 1 | 1 | 1 | 6 | LOW | II | 1 |
| Maiuri 2020               | 0 | 1 | 1 | 1 | 1 | 1 | 5 | LOW | II | 1 |
| Naito 2020                | 0 | 1 | 1 | 1 | 1 | 1 | 5 | LOW | II | 1 |
| Pemov 2020                | 0 | 1 | 1 | 1 | 1 | 1 | 5 | LOW | II | 1 |
| Portet 2020               | 1 | 1 | 1 | 1 | 1 | 1 | 6 | LOW | II | 1 |
| Telugu 2020               | 1 | 1 | 1 | 1 | 1 | 1 | 6 | LOW | II | 1 |
| Voldřich 2020             | 0 | 1 | 1 | 1 | 1 | 1 | 5 | LOW | II | 1 |

|                |   |   |   |   |   |   |   |          |     |   |
|----------------|---|---|---|---|---|---|---|----------|-----|---|
| Yamaguchi 2020 | 1 | 1 | 1 | 1 | 0 | 1 | 5 | LOW      | II  | 1 |
| Li 2019        | 0 | 1 | 1 | 1 | 1 | 1 | 5 | LOW      | III | 2 |
| Noh 2019       | 0 | 1 | 1 | 1 | 1 | 1 | 5 | LOW      | III | 2 |
| Xu 2019        | 0 | 1 | 1 | 1 | 0 | 1 | 4 | MODERATE | III | 3 |
| Brodbelt 2019  | 0 | 1 | 1 | 1 | 1 | 1 | 5 | LOW      | II  | 1 |
| Chin 2019      | 0 | 1 | 1 | 1 | 1 | 1 | 5 | LOW      | II  | 1 |
| Fрати 2019     | 1 | 1 | 1 | 1 | 1 | 1 | 6 | LOW      | II  | 1 |
| Maiuri 2019    | 1 | 1 | 1 | 1 | 1 | 1 | 6 | LOW      | II  | 1 |
| Wright 2019    | 0 | 1 | 1 | 1 | 1 | 1 | 5 | LOW      | II  | 1 |
| Yeo 2019       | 1 | 1 | 1 | 1 | 1 | 1 | 6 | LOW      | II  | 1 |
| Yolcu 2019     | 0 | 1 | 1 | 1 | 1 | 1 | 5 | LOW      | II  | 1 |
| Elkatatny 2019 | 1 | 1 | 1 | 0 | 0 | 1 | 4 | MODERATE | II  | 2 |
| Gilard 2018    | 0 | 1 | 1 | 1 | 1 | 1 | 5 | LOW      | II  | 1 |
| Hua 2018       | 1 | 1 | 1 | 1 | 1 | 1 | 6 | LOW      | II  | 1 |
| Iwata 2018     | 1 | 1 | 1 | 1 | 1 | 1 | 6 | LOW      | II  | 1 |
| Santos 2018    | 1 | 1 | 1 | 1 | 1 | 1 | 6 | LOW      | II  | 1 |
| Schwake 2018   | 1 | 1 | 1 | 1 | 0 | 1 | 5 | LOW      | II  | 1 |
| Takashima 2018 | 1 | 1 | 1 | 1 | 1 | 1 | 6 | LOW      | II  | 1 |
| Onken 2018     | 0 | 1 | 1 | 1 | 0 | 1 | 4 | MODERATE | II  | 2 |
| Harel 2017     | 0 | 1 | 1 | 1 | 0 | 1 | 4 | MODERATE | III | 3 |
| Notani 2017    | 0 | 1 | 1 | 1 | 1 | 1 | 5 | LOW      | III | 2 |

|                  |   |   |   |   |   |   |   |          |     |   |
|------------------|---|---|---|---|---|---|---|----------|-----|---|
| Wu 2017          | 0 | 1 | 1 | 1 | 1 | 1 | 5 | LOW      | III | 2 |
| Bayoumi 2017     | 1 | 1 | 1 | 1 | 1 | 1 | 6 | LOW      | II  | 1 |
| Davies 2017      | 1 | 1 | 1 | 1 | 1 | 1 | 6 | LOW      | II  | 1 |
| Raco 2017        | 1 | 1 | 1 | 1 | 1 | 1 | 6 | LOW      | II  | 1 |
| Tola 2016        | 0 | 1 | 1 | 1 | 1 | 1 | 5 | LOW      | III | 2 |
| Ye 2016          | 0 | 1 | 1 | 1 | 1 | 1 | 5 | LOW      | III | 2 |
| Kim 2016         | 0 | 1 | 1 | 1 | 1 | 1 | 5 | LOW      | II  | 1 |
| Lonjon 2016      | 0 | 1 | 1 | 1 | 1 | 1 | 5 | LOW      | II  | 1 |
| Maiti 2016       | 1 | 1 | 1 | 1 | 1 | 1 | 6 | LOW      | II  | 1 |
| Pompili 2016     | 0 | 1 | 1 | 1 | 1 | 1 | 5 | LOW      | II  | 1 |
| Zham 2016        | 1 | 1 | 1 | 1 | 0 | 1 | 5 | LOW      | II  | 1 |
| Viereck 2016     | 0 | 1 | 1 | 1 | 0 | 1 | 4 | MODERATE | II  | 2 |
| Aboul-Enein 2015 | 0 | 1 | 1 | 1 | 1 | 1 | 5 | LOW      | III | 2 |
| Lee 2015         | 0 | 1 | 1 | 1 | 1 | 1 | 5 | LOW      | III | 2 |
| Sun 2015         | 0 | 1 | 1 | 1 | 1 | 1 | 5 | LOW      | II  | 1 |
| Golanov 2015     | 0 | 1 | 1 | 1 | 0 | 1 | 4 | MODERATE | II  | 2 |
| Haq 2015         | 0 | 1 | 1 | 1 | 0 | 1 | 4 | MODERATE | II  | 2 |
| Turel 2015       | 0 | 1 | 1 | 1 | 0 | 1 | 4 | MODERATE | II  | 2 |
| Tsuda 2014       | 1 | 1 | 1 | 1 | 0 | 1 | 5 | LOW      | III | 2 |
| Ambekar 2014     | 1 | 1 | 1 | 1 | 1 | 1 | 6 | LOW      | II  | 1 |
| Arima 2014       | 0 | 1 | 1 | 1 | 1 | 1 | 5 | LOW      | II  | 1 |



|                   |   |   |   |   |   |   |   |          |     |   |
|-------------------|---|---|---|---|---|---|---|----------|-----|---|
| Gu 2014           | 1 | 1 | 1 | 1 | 1 | 1 | 6 | LOW      | II  | 1 |
| Riad 2013         | 1 | 1 | 1 | 1 | 1 | 1 | 6 | LOW      | II  | 1 |
| Barresi 2012      | 1 | 1 | 1 | 1 | 1 | 1 | 6 | LOW      | III | 2 |
| Wang 2012         | 0 | 1 | 1 | 1 | 1 | 1 | 5 | LOW      | III | 2 |
| Iacoangeli 2012   | 0 | 1 | 1 | 1 | 1 | 1 | 5 | LOW      | II  | 1 |
| Nakamura 2012     | 1 | 1 | 1 | 1 | 0 | 1 | 5 | LOW      | II  | 1 |
| Kufeld 2012       | 0 | 1 | 1 | 1 | 0 | 1 | 4 | MODERATE | II  | 2 |
| Maiuri 2011       | 1 | 1 | 1 | 1 | 1 | 1 | 6 | LOW      | II  | 1 |
| Postalci 2011     | 1 | 1 | 1 | 1 | 1 | 1 | 6 | LOW      | II  | 1 |
| Voulgaris 2010    | 0 | 1 | 1 | 1 | 1 | 1 | 5 | LOW      | III | 2 |
| Engelhard 2010    | 0 | 1 | 1 | 1 | 1 | 1 | 5 | LOW      | II  | 1 |
| Liu 2009          | 1 | 1 | 1 | 1 | 1 | 1 | 6 | LOW      | II  | 1 |
| Sacko 2009        | 0 | 1 | 1 | 1 | 1 | 1 | 5 | LOW      | II  | 1 |
| Boström 2008      | 1 | 1 | 1 | 1 | 1 | 1 | 6 | LOW      | II  | 1 |
| Sandalcioglu 2008 | 1 | 1 | 1 | 1 | 1 | 1 | 6 | LOW      | II  | 1 |
| Schröder 2008     | 1 | 1 | 1 | 1 | 1 | 1 | 6 | LOW      | II  | 1 |
| Gerszten 2008     | 0 | 1 | 1 | 1 | 0 | 1 | 4 | MODERATE | II  | 2 |
| Setzer 2007       | 1 | 1 | 1 | 1 | 1 | 1 | 6 | LOW      | II  | 1 |
| Yoon 2007         | 1 | 1 | 1 | 1 | 0 | 1 | 5 | LOW      | II  | 1 |

|                   |   |   |   |   |   |   |   |     |     |   |
|-------------------|---|---|---|---|---|---|---|-----|-----|---|
| Lee 2006          | 1 | 1 | 1 | 1 | 1 | 1 | 6 | LOW | II  | 1 |
| Sayagués 2006     | 1 | 1 | 1 | 1 | 1 | 1 | 6 | LOW | II  | 1 |
| De Verdelhan 2005 | 1 | 1 | 1 | 1 | 1 | 1 | 6 | LOW | III | 2 |
| Haegelen 2005     | 0 | 1 | 1 | 1 | 1 | 1 | 5 | LOW | III | 2 |
| Peker 2005        | 1 | 1 | 1 | 1 | 0 | 1 | 5 | LOW | II  | 1 |
| Schaller 2005     | 1 | 1 | 1 | 1 | 1 | 1 | 6 | LOW | II  | 1 |
| Morandi 2004      | 0 | 1 | 1 | 1 | 1 | 1 | 5 | LOW | III | 2 |
| Arslantas 2003    | 0 | 1 | 1 | 1 | 1 | 1 | 5 | LOW | III | 2 |
| Gambardella 2003  | 0 | 1 | 1 | 1 | 1 | 1 | 5 | LOW | III | 2 |
| Cohen-Gadol 2003  | 1 | 1 | 1 | 1 | 1 | 1 | 6 | LOW | II  | 1 |
| Schick 2001       | 0 | 1 | 1 | 1 | 1 | 1 | 5 | LOW | II  | 1 |
| Gezen 2000        | 1 | 1 | 1 | 1 | 1 | 1 | 6 | LOW | II  | 1 |

ROB = Risk of Bias, OCEBM = Oxford Center of Evidence Based Medicine

**Table S3.** Epidemiology

| Study ID                  | Spinal meningioma patients | Females | Males | % Females | M:F    | Mean age |
|---------------------------|----------------------------|---------|-------|-----------|--------|----------|
| Champeaux-Depond 2022     | 2844                       | 2251    | 593   | 79.1%     | 1:3.8  | 66       |
| Gheorghiu 2022            | 237                        | 207     | 30    | 87.3%     | 1:6.9  | NM       |
| Aoyama 2021               | 15                         | 9       | 6     | 60%       | 1:1.5  | 62.7     |
| Cao 2021                  | 4204                       | 3367    | 837   | 80.1%     | 1:4    | 62.86    |
| Pettersson-Segerlind 2021 | 129                        | 106     | 23    | 82.2%     | 1:4.6  | 65       |
| Baro 2021                 | 90                         | 75      | 15    | 83.3%     | 1:5    | 67       |
| Colli 2021                | 37                         | 31      | 6     | 83.8%     | 1:5.2  | NM       |
| Corell 2021               | 111                        | 86      | 25    | 77.5%     | 1:3.4  | 62.5     |
| Davarski 2021             | 31                         | 29      | 2     | 93.5%     | 1:14.5 | 65       |
| Kilinc 2021               | 119                        | 84      | 35    | 70.6%     | 1:2.4  | 59.9     |
| Kobayashi 2021            | 53                         | 42      | 11    | 79.2%     | 1:3.8  | 62.4     |
| Kobayashi 2021            | 116                        | 94      | 22    | 81%       | 1:4.3  | 61.2     |
| Ono H. 2021               | 14                         | 12      | 2     | 85.7%     | 1:6    | 67.9     |
| Ono K. 2021               | 24                         | 20      | 4     | 83.3%     | 1:5    | 65.4     |
| Tominaga 2021             | 29                         | 22      | 7     | 75.9%     | 1:3.1  | NM       |
| Wach 2021                 | 123                        | 94      | 29    | 76.4%     | 1:3.2  | 65.6     |
| Han 2020                  | 336                        | 259     | 77    | 77.1%     | 1:3.4  | 49.9     |
| Hohenberger 2020          | 45                         | 39      | 6     | 86.7%     | 1:6.5  | 63       |
| Kwee 2020                 | 166                        | 139     | 27    | 83.7%     | 1:5.1  | 66       |
| Lee 2020                  | 59                         | 49      | 10    | 83.1%     | 1:4.9  | 59.7     |
| Portet 2020               | 30                         | 27      | 3     | 90%       | 1:9    | 73       |
| Voldřich 2020             | 84                         | 68      | 16    | 81%       | 1:4.3  | 65       |
| Yamaguchi 2020            | 53                         | 48      | 5     | 90.6%     | 1:9.6  | 60       |
| Elkakatny 2019            | 45                         | 33      | 12    | 73.3%     | 1:2.8  | 42       |
| Yeo 2019                  | 105                        | 92      | 13    | 87.6%     | 1:7.1  | 61.5     |
| Gilard 2018               | 87                         | 70      | 17    | 80.5%     | 1:4.1  | 64.6     |
| Hua 2018                  | 483                        | 384     | 99    | 79.5%     | 1:3.9  | 53.76    |
| Iwata 2018                | 24                         | 16      | 8     | 66.7%     | 1:2    | 68       |
| Onken 2018                | 210                        | 170     | 40    | 81%       | 1:4.3  | 65       |
| Santos 2018               | 51                         | 40      | 11    | 78.4%     | 1:3.6  | 57.6     |
| Schwake 2018              | 88                         | 74      | 14    | 84.1%     | 1:5.3  |          |

|                   |       |      |      |        |        |       |
|-------------------|-------|------|------|--------|--------|-------|
| Takashima 2018    | 20    | 16   | 4    | 80%    | 1:4    | 63.3  |
| Davies 2017       | 31    | 27   | 4    | 87.1%  | 1:6.8  | 64    |
| Wu 2017           | 14    | 5    | 9    | 35.7%  | 1:0.6  | 11.1  |
| Kim 2016          | 20    | 15   | 5    | 75%    | 1:3    | 59    |
| Maiti 2016        | 38    | 31   | 7    | 81.6%  | 1:4.4  | 56    |
| Pompili 2016      | 27    | 25   | 2    | 92.6%  | 1:12.5 | 59.5  |
| Tola 2016         | 20    | 14   | 6    | 70%    | 1:2.3  | 61    |
| Zham 2016         | 39    | 25   | 14   | 64.1%  | 1:1.8  | 51.6  |
| Tsuda 2014        | 14    | 11   | 3    | 78.6%  | 1:3.7  | 56.2  |
| Ambekar 2014      | 13698 | 9160 | 4538 | 66.90% | 1:2    | NM    |
| Gu 2014           | 31    | 19   | 12   | 61.3%  | 1:1.6  | NM    |
| Riad 2013         | 15    | 13   | 2    | 86.7%  | 1:6.5  | 67.6  |
| Barresi 2012      | 58    | 48   | 10   | 82.8%  | 1:4.8  | 59.1  |
| Nakamura 2012     | 68    | 56   | 12   | 82.4%  | 1:4.7  | 56    |
| Iacoangeli 2012   | 30    | 20   | 10   | 66.7%  | 1:2    | 74.6  |
| Wang 2012         | 10    | 2    | 8    | 20%    | 1:0.3  | 13.2  |
| Maiuri 2011       | 117   | 87   | 30   | 74.4%  | 1:2.9  | 59    |
| Postalci 2011     | 46    | 33   | 13   | 71.7%  | 1:2.5  | 52    |
| Engelhard 2010    | 105   | 90   | 15   | 85.7%  | 1:6    | NM    |
| Liu 2009          | 36    | 29   | 7    | 80.6%  | 1:4.1  | NM    |
| Sacko 2009        | 102   | 87   | 15   | 85.3%  | 1:5.8  | 74.6  |
| Boström 2008      | 61    | 50   | 11   | 82%    | 1:4.5  | 61    |
| Sandalcioglu 2008 | 131   | 114  | 17   | 87%    | 1:6.7  | 69    |
| Schröder 2008     | 30    | 23   | 7    | 76.7%  | 1:3.3  | 68    |
| Setzer 2007       | 80    | 58   | 22   | 72.5%  | 1:2.6  | 61.9  |
| Yoon 2007         | 38    | 31   | 7    | 81.6%  | 1:4.4  | 52    |
| Sayagués 2006     | 14    | 13   | 1    | 92.9%  | 1:13   | 64    |
| De Verdelhan 2005 | 23    | 19   | 4    | 82.6%  | 1:4.8  | 60    |
| Peker 2005        | 41    | 32   | 9    | 78%    | 1:3.6  | 50    |
| Schaller 2005     | 33    | 30   | 3    | 90.9%  | 1:10   | 63    |
| Morandi 2004      | 30    | 25   | 5    | 83.3%  | 1:5    | 77.1  |
| Arslantas 2003    | 16    | 13   | 3    | 81.3%  | 1:4.3  | 50.12 |
| Cohen-Gadol 2003  | 80    | 68   | 12   | 85%    | 1:5.7  | 63    |
| Schick 2001       | 81    | NM   | NM   | >50%   | NM     | NM    |
| Gezen 2000        | 36    | 27   | 9    | 75%    | 1:3    | 49    |

NM = Not Mentioned

**Table S4.** Histopathology

| Study ID                  | All spin al menio mas | W HO 1 | W HO 2 | W H O 3 | WHO 1 subtypes  |              |               |            |               |              |            |                          |               | WHO 2 subtypes |            |           | WHO 3 subtypes |           |             | Others                                                               |
|---------------------------|-----------------------|--------|--------|---------|-----------------|--------------|---------------|------------|---------------|--------------|------------|--------------------------|---------------|----------------|------------|-----------|----------------|-----------|-------------|----------------------------------------------------------------------|
|                           |                       |        |        |         | Mening othelial | Fibroblastic | Trans itional | Psam mom a | Angi omat ous | Micro cystic | Secret ory | Lymp hoplas mac yte-rich | Meta plasti c | Chor doid      | Clear cell | Atypi cal | Papill ary     | Rhab doid | Anap lastic |                                                                      |
| Ampie 2021                | 46                    | 43     | 2      | 1       | 8               |              | 1             | 11         |               |              |            |                          | 2             |                |            | 2         |                |           | 1           | 3 multiple components<br>18 WHO I tumors were of unspecified subtype |
| Pettersson-Segerlind 2021 | 129                   | 127    | 2      | 0       |                 |              |               |            |               |              |            |                          |               |                |            |           |                |           |             |                                                                      |
| Baro 2021                 | 90                    | 85     | 4      | 1       |                 |              |               |            |               |              |            |                          |               |                |            |           |                |           |             |                                                                      |
| Kwee 2020                 | 166                   | 143    | 7      | 0       | 24              |              | 48            | 71         |               |              |            |                          |               |                |            | 7         |                |           |             | 16 tumors of unspecified subtypes                                    |
| Han 2020                  | 337                   | 317    | 15     | 5       |                 |              |               |            |               |              |            |                          |               | 2              | 5          | 8         | 1              |           | 4           |                                                                      |
| Schwake 2018              | 88                    | 86     | 1      | 0       | 49              | 3            | 23            | 9          | 1             |              |            |                          | 1             |                |            | 1         |                |           |             | 1 unclear                                                            |
| Maiti 2016                | 38                    | 35     | 3      | 0       |                 |              |               |            |               |              |            |                          |               |                |            |           |                |           |             |                                                                      |
| Tsuda 2014                | 14                    | 14     | 0      | 0       | 4               | 2            | 3             | 3          | 1             | 1            |            |                          |               |                |            |           |                |           |             |                                                                      |
| Barresi 2012              | 58                    | 55     | 3      | 0       | 8               | 5            | 26            | 8          | 1             |              |            |                          | 7             |                | 2          | 1         |                |           |             |                                                                      |
| Nakamura 2012             | 68                    | 67     | 0      | 1       | 23              | 2            | 11            | 22         | 5             |              |            |                          | 4             |                |            |           | 1              |           |             |                                                                      |

|                      |     |     |   |   |    |    |    |    |   |  |  |  |   |   |   |   |  |  |   |                                                                                                                      |
|----------------------|-----|-----|---|---|----|----|----|----|---|--|--|--|---|---|---|---|--|--|---|----------------------------------------------------------------------------------------------------------------------|
| Wang 2012            | 10  | 7   | 3 | 0 | 1  | 3  |    | 3  |   |  |  |  |   |   | 1 | 2 |  |  |   |                                                                                                                      |
| Maiuri 2011          | 117 | 114 | 2 | 0 | 35 | 5  | 32 | 39 | 1 |  |  |  | 2 |   |   | 2 |  |  |   | 1<br>sclerosing                                                                                                      |
| Yoon 2007            | 38  | 36  | 0 | 2 | 16 | 4  | 5  | 7  |   |  |  |  |   |   |   |   |  |  |   | 4 had<br>multiple<br>componen<br>ts<br>2 were<br>WHO III<br>of<br>unspecifie<br>d subtype                            |
| Cohen-<br>Gadol 2003 | 80  | 77  | 2 | 0 | 30 | 3  | 9  | 34 |   |  |  |  | 1 | 1 | 1 |   |  |  |   | 1<br>unspecifie<br>d                                                                                                 |
| Gezen 2000           | 36  | 36  | 0 | 0 | 10 |    | 7  | 19 |   |  |  |  |   |   |   |   |  |  |   |                                                                                                                      |
| Hohenberg<br>er 2020 | 45  | 34  | 1 | 0 | 11 | 2  | 2  | 12 | 1 |  |  |  |   | ? | ? | ? |  |  |   | 5 had<br>multiple<br>componen<br>ts<br>1 WHO II<br>of<br>unspecifie<br>d subtype<br>1<br>sclerosing<br>10<br>unknown |
| Raco 2017            | 173 | 170 | 2 | 1 |    | 23 |    | 47 |   |  |  |  |   |   |   | 2 |  |  | 1 | Of the 170<br>WHO I<br>tumors,<br>the                                                                                |

|                |      |      |    |   |     |     |     |     |    |   |   |   |   |   |    |    |   |  |   |                                                                        |
|----------------|------|------|----|---|-----|-----|-----|-----|----|---|---|---|---|---|----|----|---|--|---|------------------------------------------------------------------------|
|                |      |      |    |   |     |     |     |     |    |   |   |   |   |   |    |    |   |  |   | subtype of only 88 was determined, 18 of which had multiple components |
| Schaller 2005  | 33   | 33   | 0  | 0 | 4   | 7   |     | 22  |    |   |   |   |   |   |    |    |   |  |   |                                                                        |
| Cao 2021       | 1483 | 1388 | 95 | 1 | 378 | 43  | 166 | 786 | 15 |   |   |   |   |   | 41 | 53 | 1 |  |   |                                                                        |
| Colli 2021     | 36   | 36   | 0  | 0 | 8   | 2   | 16  | 9   |    |   |   |   | 1 |   |    |    |   |  |   |                                                                        |
| Hua 2018       | 483  | 461  | 14 | 8 | 128 | 180 | 38  | 95  | 6  | 1 | 2 | 4 | 7 |   | 6  | 8  |   |  | 8 |                                                                        |
| Voulgaris 2010 | 10   | 10   | 0  | 0 | 2   |     | 3   | 5   |    |   |   |   |   |   |    |    |   |  |   |                                                                        |
| Maiuri 2019    | 28   | 26   | 2  | 0 | 2   | 1   | 8   | 13  | 2  |   |   |   |   |   |    | 2  |   |  |   |                                                                        |
| Portet 2020    | 30   | 30   | 0  | 0 | 13  |     | 6   | 11  |    |   |   |   |   |   |    |    |   |  |   |                                                                        |
| Kobayashi 2021 | 116  | 113  | 3  | 0 | 71  | 11  | 7   | 24  |    |   |   |   |   |   |    | 3  |   |  |   |                                                                        |
| Lonjon 2016    | 23   | 21   | 1  | 0 | 10  |     | 1   | 8   |    |   |   |   |   |   |    |    |   |  |   | 2 multiple components<br>1 WHO II psammoma<br>1 missing                |
| Kilinc 2021    | 119  | 112  | 7  | 0 | 93  | 3   | 4   | 9   | 1  |   |   |   |   | ? | ?  | ?  |   |  |   | 2 unknown<br>7 WHOII of                                                |





|                   |     |     |    |   |    |  |    |   |  |  |  |  |   |    |    |   |  |   |                                                                                          |
|-------------------|-----|-----|----|---|----|--|----|---|--|--|--|--|---|----|----|---|--|---|------------------------------------------------------------------------------------------|
| Davies 2017       | 31  | 29  | 2  | 0 |    |  |    |   |  |  |  |  |   |    |    |   |  |   |                                                                                          |
| Onken 2018        | 207 | 201 | 6  | 0 |    |  |    |   |  |  |  |  |   |    |    |   |  |   |                                                                                          |
| Postalci 2011     | 46  | 44  | 2  | 0 |    |  |    |   |  |  |  |  |   |    |    |   |  |   |                                                                                          |
| Sandalcioglu 2008 | 131 | 129 | 2  | 0 |    |  |    |   |  |  |  |  |   |    |    |   |  |   |                                                                                          |
| Yamaguchi 2020    | 53  | 50  | 3  | 0 |    |  |    |   |  |  |  |  |   | 1  | 2  |   |  |   |                                                                                          |
| Ye 2016           | 25  | 0   | 20 | 5 |    |  |    |   |  |  |  |  | 1 | 2  | 17 | 3 |  | 2 |                                                                                          |
| Wu 2017           | 14  | 9   | 5  | 0 | 4  |  | 2  | 3 |  |  |  |  | 1 | 3  | 1  |   |  |   |                                                                                          |
| Lee 2006          | 75  | 75  | 0  | 0 | 60 |  |    |   |  |  |  |  |   |    |    |   |  |   | 15 non-meningothelial tumors of unspecified subtype.                                     |
| Krauss 2021       | 189 | 172 | 15 | 2 |    |  |    |   |  |  |  |  |   | 3  | 9  | 1 |  | 1 | 2 had multiple components<br>1 WHO II fibrous<br>172 WHO I tumors of unspecified subtype |
| Sayagués 2006     | 14  | 14  | 0  | 0 | 5  |  | 3  | 6 |  |  |  |  |   |    |    |   |  |   |                                                                                          |
| Arslantas 2003    | 16  | 15  | 1  | 0 | 1  |  | 13 | 1 |  |  |  |  |   |    | 1  |   |  |   |                                                                                          |
| Li 2019           | 12  | 0   | 12 | 0 |    |  |    |   |  |  |  |  |   | 12 |    |   |  |   |                                                                                          |

|                 |    |    |   |   |    |    |   |    |   |  |  |  |   |  |   |   |  |  |  |              |
|-----------------|----|----|---|---|----|----|---|----|---|--|--|--|---|--|---|---|--|--|--|--------------|
| Xu 2019         | 17 | 17 | 0 | 0 | 5  |    | 4 | 7  | 1 |  |  |  |   |  |   |   |  |  |  |              |
| Kobayashi 2021  | 53 | 53 | 0 | 0 | 35 | 1  | 4 | 13 |   |  |  |  |   |  |   |   |  |  |  |              |
| Ono K. 2021     | 22 | 21 | 1 | 0 | 10 |    | 5 | 6  |   |  |  |  |   |  | 1 |   |  |  |  |              |
| Aoyama 2021     | 15 | 15 | 0 | 0 | 8  | 1  |   | 5  |   |  |  |  | 1 |  |   |   |  |  |  |              |
| Kim 2016        | 20 | 19 | 1 | 0 | 13 | 1  | 4 |    | 1 |  |  |  |   |  | 1 |   |  |  |  |              |
| Tominaga 2021   | 29 | 29 | 0 | 0 | 13 | 1  | 2 | 13 |   |  |  |  |   |  |   |   |  |  |  |              |
| Peker 2005      | 41 | 38 | 0 | 0 | 17 | 3  | 8 | 10 |   |  |  |  |   |  |   |   |  |  |  | 3<br>unknown |
| Schröder 2008   | 30 | 23 | 1 | 0 | 17 |    |   | 6  |   |  |  |  |   |  |   |   |  |  |  | 6<br>unknown |
| Elkatatny 2019  | 45 | 39 | 6 | 0 | 15 | 6  | 9 | 9  |   |  |  |  |   |  |   | 6 |  |  |  |              |
| Iacoangeli 2012 | 65 | 65 | 0 | 0 | 37 | 10 | 4 | 14 |   |  |  |  |   |  |   |   |  |  |  |              |
| Morandi 2004    | 30 | 27 | 3 | 0 | 4  | 1  | 7 | 15 |   |  |  |  |   |  |   | 3 |  |  |  |              |
| Saiwai 2021     | 39 | 39 | 0 | 0 | 19 | 3  | 3 | 14 |   |  |  |  |   |  |   |   |  |  |  |              |

WHO = World Health Organization

**Table S5.** Genetics and immunohistochemistry

| Study ID                  | mean Ki-67/MIB-1 (%) | Range Ki-67/MIB-1 | ER+/- | PR +/- | AR +/- | # NF2 | Other syndromes |
|---------------------------|----------------------|-------------------|-------|--------|--------|-------|-----------------|
| Champeaux-Depond 2022     |                      |                   |       |        |        | 25    |                 |
| Pettersson-Segerlind 2021 | Median: 4.5          | 0-20              |       |        |        | 1     |                 |
| Ono K. 2021               | 2.4                  |                   |       |        |        |       |                 |
| Wach 2021                 | Median: 4            | 2-12              |       |        |        |       |                 |
| Ampie 2021                |                      |                   |       |        |        | 3     | 1 VHL           |
| Baro 2021                 |                      |                   |       |        |        | 2     |                 |
| Portet 2020               |                      |                   | 9/21  | 29/1   | 30/0   |       |                 |
| Telugu 2020               |                      |                   |       | 7/4    |        |       |                 |
| Pemov 2020                |                      |                   |       |        |        | 4     |                 |
| Kwee 2020                 |                      |                   |       |        |        | 2     |                 |
| Han 2020                  |                      |                   |       |        |        | 1     |                 |
| Voldřich 2020             |                      |                   |       |        |        | 2     |                 |
| Hohenberger 2020          |                      |                   |       |        |        | 14*   |                 |
| Li 2019                   |                      |                   |       | 7/1    |        |       |                 |
| Noh 2019                  | 5.7                  |                   |       |        |        |       |                 |
| Maiuri 2019               |                      |                   |       |        |        |       |                 |
| Hua 2018                  | 1.94                 | 1–20              |       | 74/120 |        |       |                 |
| Schwake 2018              |                      |                   |       |        |        | 1     |                 |
| Wu 2017                   | 1.6                  | 1-4               |       |        |        |       |                 |

|                  |      |          |      |      |   |       |
|------------------|------|----------|------|------|---|-------|
| Raco 2017        |      |          |      |      | 0 |       |
| Maiti 2016       |      |          |      |      | 6 |       |
| Sun 2015         | 11.2 | 5.8-23.8 |      |      |   |       |
| Tsuda 2014       |      |          |      |      | 1 |       |
| Barresi 2012     | 1.4  | 1-5      | 0/58 | 50/8 | 2 |       |
| Wang 2012        | 1.5  | 1-3      | 0/10 | 6/4  | 4 |       |
| Nakamura 2012    |      |          |      |      | 2 |       |
| Maiuri 2011      |      |          | 0/20 | 20/0 | 3 |       |
| Voulgaris 2010   | 2.75 | 0.5-7    |      |      |   |       |
| Yoon 2007        |      |          |      |      | 1 | 1 NF1 |
| Cohen-Gadol 2003 |      |          |      |      | 5 |       |
| Gezen 2000       |      |          |      |      | 1 |       |

*\*Not specified whether NF1 or NF2, NF = Neurofibromatosis, VHL = von Hippel-Lindau, AR = Androgen Receptor, ER = Estrogen receptor, PR = Progesterone Receptor*

**Table S6.** Tumor location

| Study ID                  | Number of spinal meningiomas | Cer | CT | Th  | TL | L  | Sacral | CCJ (excluded) | D     | V     | L  | DL   | VL | Circumferent | Dumbbell shape |
|---------------------------|------------------------------|-----|----|-----|----|----|--------|----------------|-------|-------|----|------|----|--------------|----------------|
| Davarski 2021             | 31                           | 5   | 2  | 21  | 2  | 1  |        |                | 7     | 2     | 1  | 14   | 7  |              | 2              |
| Corell 2021               | 108                          | 26  |    | 70  |    | 11 | 1      | 9              |       |       |    |      |    |              |                |
| Pettersson-Segerlind 2021 | 129                          | 39  |    | 89  |    | 1  |        |                |       |       |    |      |    |              |                |
| Kilinc 2021               | 119                          | 29  | 4  | 82  | 1  | 3  |        |                | 2     | 8     | 73 | 9    | 24 |              |                |
| Kobayashi 2021            | 116                          | 22  |    | 90  |    | 4  |        |                | 10    | 34    | 64 |      |    |              | 3              |
| Wach 2021                 | 123                          | 31  |    | 90  |    | 2  |        |                | 36    | 37    | 49 |      |    |              |                |
| Ampie 2021                | 74                           | 22  |    | 50  |    | 2  |        |                | 31/46 | 15/46 |    |      |    |              |                |
| Ono K. 2021               | 22                           | 6   |    | 17  |    | 1  |        |                | 8     | 10    | 5  |      |    | 1            |                |
| Baro 2021                 | 90                           | 13  | 2  | 73  | 1  | 1  |        |                | 22    | 7     | 34 | 5    | 22 |              |                |
| Ono H. 2021               | 14                           | 5   |    | 9   |    |    |        |                |       |       |    |      |    |              |                |
| Aoyama 2021               | 15                           | 6   |    | 9   |    |    |        |                |       |       |    |      |    |              |                |
| Kobayashi 2021            | 53                           | 14  |    | 38  |    | 1  |        |                | 10    | 16    | 27 |      |    |              |                |
| Saiwai 2021               | 39                           | 6   |    | 32  |    |    |        |                | 7     | 4     | 27 |      |    |              |                |
| Tominaga 2021             | 29                           | 5   |    | 23  |    | 1  |        |                | 5     | 2     |    | 5    | 17 |              |                |
| Colli 2021                | 36                           | 9   | 3  | 23  | 2  |    |        |                |       |       |    |      |    |              |                |
| Voldřich 2020             | 84                           | 15  |    | 69  |    |    |        |                |       |       |    |      |    |              | 4              |
| Han 2020                  | 337                          | 115 | 12 | 174 | 12 | 24 |        |                |       | 8/19  |    | 6/19 |    | 6/19         | 5/19           |
| Hohenberger 2020          | 45                           | 19  |    | 25  |    | 1  |        |                | 2     | 5     | 32 | 1    | 5  |              |                |





|                   |     |    |   |    |   |   |   |   |      |      |       |       |       |      |       |
|-------------------|-----|----|---|----|---|---|---|---|------|------|-------|-------|-------|------|-------|
| Boström 2008      | 61  | 11 |   | 51 |   |   |   |   |      |      | 36    | 9     | 12    | 1    |       |
| Sandalcioglu 2008 | 131 | 21 | 7 | 95 | 6 | 2 |   |   | 13   | 12   | 46    | 22    | 38    |      |       |
| Schröder 2008     | 22  | 1  | 6 | 9  | 5 | 1 |   | 8 |      |      |       |       |       |      |       |
| Gerszten 2008     | 13  | 10 |   | 2  |   |   | 1 |   |      |      |       |       |       |      |       |
| Setzer 2007       | 80  | 17 | 6 | 48 | 6 | 3 |   |   | 5    | 14   | 11    | 17    | 33    |      | 5     |
| Yoon 2007         | 38  | 6  | 2 | 28 | 1 | 1 |   |   | 1/30 | 5/30 | 12/30 | 10/30 |       |      | 2/30  |
| Schaller 2005     | 33  | 10 |   | 23 |   |   |   |   | 8    | 6    | 19    |       |       |      | 2     |
| Peker 2005        | 41  | 7  |   | 34 |   |   |   |   |      |      |       |       |       |      |       |
| De Verdelhan 2005 | 24  | 3  |   | 21 |   |   |   |   | 2    | 3    | 7     | 7     | 5     |      |       |
| Haegelen 2005     | 56  | 13 |   | 42 |   | 1 |   |   | 2    | 3    | 9     | 20    | 22    |      |       |
| Morandi 2004      | 30  | 2  |   | 28 |   |   |   |   |      |      |       |       |       |      | 1     |
| Cohen-Gadol 2003  | 80  | 24 |   | 55 |   | 2 |   |   | 2/41 | 3/41 | 11/41 | 12/41 | 10/41 | 3/41 | 10/71 |
| Gambardella 2003  | 10  |    |   | 10 |   |   |   |   |      | 10   |       |       |       |      |       |
| Arslantas 2003    | 16  | 3  |   | 13 |   |   |   |   |      |      |       |       |       |      |       |
| Gezen 2000        | 36  | 5  | 2 | 20 | 4 | 5 |   |   | 12   | 7    | 18    |       |       |      |       |

*Cer = Cervical, CT = Cervicothoracal, Th = thoracal, TL, Thoracolumbar, L = Lumbar, V = Ventral, VL = Ventrolateral, D = Dorsal, DL = Dorsolateral, L = Lateral,*



**Table S7.** Presenting symptoms

| Study ID                  | Most common presenting symptom           | Second most common                       | Third most common            | Asymptomatic | Mean symptom duration (mos) |
|---------------------------|------------------------------------------|------------------------------------------|------------------------------|--------------|-----------------------------|
| Champeaux-Depond 2022     | motor dysfunction                        | bladder or bowel dysfunction             | gait disturbance             |              |                             |
| Ampie 2021                | sensory dysfunction<br>motor dysfunction |                                          |                              | 2            |                             |
| Corell 2021               | sensory dysfunction                      | motor dysfunction                        | gait disturbance             | 6            |                             |
| Kilinc 2021               | sensory dysfunction                      | gait disturbance                         | motor dysfunction            | 3            |                             |
| Wach 2021                 | pain                                     | sensory dysfunction                      | motor dysfunction            | 4            |                             |
| Pettersson-Segerlind 2021 | motor dysfunction                        | sensory dysfunction                      | gait disturbance             |              |                             |
| Davarski 2021             | motor dysfunction                        | pain                                     | bladder or bowel dysfunction |              | 6.45                        |
| Kobayashi 2021            | gait disturbance                         | pain                                     | motor dysfunction            | 9            | 11.3                        |
| Baro 2021                 |                                          |                                          |                              |              | median: 9                   |
| Ono K. 2021               |                                          |                                          |                              |              | 17.5                        |
| Kobayashi 2021            |                                          |                                          |                              |              | 10.8                        |
| Ono H. 2021               |                                          |                                          |                              |              | 10                          |
| Hohenberger 2020          | sensory dysfunction                      | gait disturbance                         | motor dysfunction            |              | 3.6                         |
| Han 2020                  | pain                                     | sensory dysfunction<br>motor dysfunction | bladder or bowel dysfunction |              | 15.29                       |
| Yamaguchi 2020            | pain                                     | sensory dysfunction                      | motor dysfunction            |              |                             |
| Kwee 2020                 | motor dysfunction                        | sensory dysfunction                      | pain                         |              |                             |

|                |                                          |                                       |                              |    |                                          |
|----------------|------------------------------------------|---------------------------------------|------------------------------|----|------------------------------------------|
| Voldřich 2020  | motor dysfunction                        | sensory dysfunction                   | bladder or bowel dysfunction | 10 | 10.4                                     |
| Noh 2019       | sensory dysfunction                      | motor dysfunction<br>gait disturbance | pain                         |    | 7.7                                      |
| Yeo 2019       | sensory and motor dysfunction            | pain                                  | gait disturbance             | 4  |                                          |
| Chin 2019      | pain                                     | sensory dysfunction                   | motor dysfunction            | 12 |                                          |
| Li 2019        | pain                                     | sensory and motor dysfunction         | bladder or bowel dysfunction |    | 27.6                                     |
| Elkatatny 2019 | motor dysfunction                        | bladder or bowel dysfunction and pain |                              |    | 9.5                                      |
| Xu 2019        |                                          |                                       |                              |    | 19.3                                     |
| Santos 2018    | sensory dysfunction<br>motor dysfunction | pain                                  | bladder or bowel dysfunction |    | 20                                       |
| Hua 2018       | sensory dysfunction                      | pain                                  | motor dysfunction            | 26 | 14.91                                    |
| Schwake 2018   | sensory dysfunction                      | motor dysfunction                     | pain                         |    |                                          |
| Gilard 2018    | motor dysfunction                        | pain (back)                           |                              | 6  | 5.4                                      |
| Onken 2018     |                                          |                                       |                              |    | 0.25-3 (25%), 3-12 (56%), and > 12 (18%) |
| Davies 2017    | sensory dysfunction                      | motor dysfunction                     |                              |    |                                          |
| Raco 2017      | pain                                     | motor and gait dysfunction            | sensory dysfunction          |    | 20.01                                    |
| Wu 2017        | motor dysfunction                        | pain                                  | sensory dysfunction          |    | 9.7                                      |
| Ye 2016        | sensory dysfunction                      | motor dysfunction                     | pain                         |    |                                          |
| Pompili 2016   | pain                                     | motor dysfunction                     | bladder or bowel dysfunction |    |                                          |

|                   |                                  |                                          |                                         |   |      |
|-------------------|----------------------------------|------------------------------------------|-----------------------------------------|---|------|
| Tola 2016         | pain                             | gait disturbance                         | sensory dysfunction                     |   | 6    |
| Lonjon 2016       | motor dysfunction                | gait disturbance                         | pain                                    |   |      |
| Sun 2015          | pain<br>sensory dysfunction      | motor dysfunction                        | gait disturbance                        | 1 |      |
| Haq 2015          | pain                             | sensory dysfunction                      | motor dysfunction                       |   |      |
| Aboul-Enein 2015  | pain                             | sensory dysfunction                      | motor dysfunction                       |   |      |
| Tsuda 2014        | sensory dysfunction              | motor dysfunction                        | pain                                    |   |      |
| Riad 2013         | gait disturbance                 | sensory dysfunction<br>motor dysfunction | bladder or bowel<br>dysfunction<br>pain |   | 11   |
| Iacoangeli 2012   | pain (back)                      | motor dysfunction                        | bladder or bowel<br>dysfunction         |   |      |
| Wang 2012         | pain                             | motor dysfunction                        | gait disturbance                        |   | 5.7  |
| Postalci 2011     | pain                             | sensory and motor<br>dysfunction         | bladder or bowel<br>dysfunction         | 3 |      |
| Engelhard 2010    | motor dysfunction                | sensory dysfunction                      | gait disturbance                        |   |      |
| Voulgaris 2010    | motor dysfunction                | pain                                     | gait disturbance                        |   |      |
| Sacko 2009        | bladder or bowel<br>dysfunction  | pain                                     | sensory dysfunction                     |   | 9.5  |
| Boström 2008      | sensory dysfunction              | gait disturbance                         | motor dysfunction                       |   |      |
| Sandalcioglu 2008 | sensory and motor<br>dysfunction | gait disturbance                         | pain                                    |   |      |
| Schröder 2008     | motor dysfunction                | gait disturbance                         | pain<br>sensory dysfunction             |   | 12   |
| Setzer 2007       | sensory dysfunction              | gait disturbance                         | motor dysfunction                       |   | 11.8 |
| Yoon 2007         | motor dysfunction                |                                          |                                         |   | 12   |

|                  |                           |                     |                              |  |      |
|------------------|---------------------------|---------------------|------------------------------|--|------|
| Schaller 2005    | pain                      | sensory dysfunction | bladder or bowel dysfunction |  | 22   |
| Peker 2005       | pain                      | motor dysfunction   | sensory dysfunction          |  | 14   |
| Morandi 2004     |                           |                     |                              |  | 13.4 |
| Cohen-Gadol 2003 | sensory dysfunction       | gait disturbance    | pain                         |  |      |
| Gambardella 2003 | pain<br>motor dysfunction | sensory dysfunction |                              |  | 25.2 |
| Gezen 2000       | pain<br>motor dysfunction | sensory dysfunction | bladder or bowel dysfunction |  |      |

**Table S8.** Non-surgical treatment options

| Study ID                  | Type of non-surgical treatment option | Number of patients | Number of tumors treated with Primary/Adjuvant/Salvage therapies | % with non-surgical treatment options | Doses                                                                                                                                                        | Indications                                                                                                           | Outcomes and complications of the therapy                                                                                                                                                                                                                                                  |
|---------------------------|---------------------------------------|--------------------|------------------------------------------------------------------|---------------------------------------|--------------------------------------------------------------------------------------------------------------------------------------------------------------|-----------------------------------------------------------------------------------------------------------------------|--------------------------------------------------------------------------------------------------------------------------------------------------------------------------------------------------------------------------------------------------------------------------------------------|
| Ampie 2021                | Radiotherapy                          | 2                  | 0/2/0                                                            | 4.3%                                  | 31.8 Gy as reported for only 1 of the patients                                                                                                               | WHO grade III and subtotal resection                                                                                  | Radiotherapy and RTK-inhibitors did not benefit the patient with WHO grade III tumor as he died shortly after the therapy                                                                                                                                                                  |
| Pettersson-Segerlind 2021 | Radiotherapy                          | 1                  | 0/1/0                                                            | 0.8%                                  |                                                                                                                                                              | Subtotal resection (however only 1 of 20 subtotal resected spinal meningiomas received further adjuvant radiotherapy) |                                                                                                                                                                                                                                                                                            |
| Krauss 2021               | Radiotherapy                          | 10                 | 0/7/3                                                            | 23.5%                                 | - 33x180 cGy<br>- 30x180 cGy<br>- 30x180 cGy<br>- 35 fractions<br>- 33x180 cGy<br>- 33x180 cGy<br>- 28x180 cGy<br>- 28x180 cGy<br>- Not stated<br>- 5600 cGy | WHO grade II and III spinal meningiomas and recurrent tumors                                                          | Two patient who received adjuvant radiotherapy experienced recurrence.<br>Adjuvant radiotherapy was associated with significantly lower rates of recurrence.<br>Complications were reported in 3 patients: radiation necrosis, panic attack, and constipation following radiation therapy. |
| Kobayashi 2021            | Radiotherapy                          | 2                  | 0/2/0                                                            | 2%                                    | - 48Gy<br>- 54Gy                                                                                                                                             | WHO grade II                                                                                                          | Both patients experienced recurrence even with radiotherapy                                                                                                                                                                                                                                |
| Cao 2021                  | Radiotherapy                          | 108                | Not mentioned                                                    | 2.6%                                  |                                                                                                                                                              |                                                                                                                       | Patients who received adjuvant radiotherapy usually had worse                                                                                                                                                                                                                              |

|            |                                                                                 |     |           |      |                                                                                                                               |                                                                                                                                                                  |                                                                                                                                                                                                                                                               |
|------------|---------------------------------------------------------------------------------|-----|-----------|------|-------------------------------------------------------------------------------------------------------------------------------|------------------------------------------------------------------------------------------------------------------------------------------------------------------|---------------------------------------------------------------------------------------------------------------------------------------------------------------------------------------------------------------------------------------------------------------|
|            |                                                                                 |     |           |      |                                                                                                                               |                                                                                                                                                                  | survival outcomes than those who did not (significant on univariate but not on multivariate analysis)                                                                                                                                                         |
| Kwee 2020  | Radiotherapy                                                                    | 1   | 0/0/1     | 0.6% |                                                                                                                               | Recurrent WHO grade II tumor (however only 1/6 recurrent WHO grade II received radiotherapy)                                                                     |                                                                                                                                                                                                                                                               |
| Han 2020   | Radiotherapy                                                                    | 1   | 0/1/0     | 5.3% |                                                                                                                               | High grade (WHO II and III) spinal meningiomas                                                                                                                   |                                                                                                                                                                                                                                                               |
| Yolcu 2019 | Stereotactic radiosurgery (n=111)<br>Radiotherapy (n=156)<br>Bradytherapy (n=1) | 268 | 131/137/0 | 100% | Mean radiation dose for stereotactic radiosurgery: 24Gy (8-200Gy)<br>Mean radiation dose for radiotherapy: 40.4Gy (2.5-540Gy) | Multivariate analysis revealed that radiation-based therapies were most commonly used for patients with subtotal resection or those with higher WHO grade tumors | Significantly worse survival outcomes for WHO II & III tumors who received radiation than those who did not                                                                                                                                                   |
| Chin 2019  | Stereotactic radiosurgery                                                       | 39  | 20/0/19   | 100% | Median prescription dose: 20Gy (16-30Gy)<br>Median number of fractions: 2 (1-3)                                               | Neurofibromatosis constituted one of the indications                                                                                                             | Five spinal meningiomas recurred after stereotactic radiosurgery, 4 of which occurred in the same patient (median follow-up: 46 months). 10/16 patients that initially presented with pain had either improved or stabilized and 6/16 were lost to follow-up. |
| Li 2019    | None                                                                            | 0   |           | 0%   |                                                                                                                               |                                                                                                                                                                  | 42% of patients presented with recurrences                                                                                                                                                                                                                    |

|              |                                                     |    |         |       |                                                                                 |                                                                                                                                                           |                                                                                                                                                                                                                                      |
|--------------|-----------------------------------------------------|----|---------|-------|---------------------------------------------------------------------------------|-----------------------------------------------------------------------------------------------------------------------------------------------------------|--------------------------------------------------------------------------------------------------------------------------------------------------------------------------------------------------------------------------------------|
| Schwake 2018 | Radiotherapy                                        | 1  | 0/0/1   | 1.1%  |                                                                                 | Surgery contraindicated as the patient experience a 3rd recurrence after 2 separate resection surgeries                                                   |                                                                                                                                                                                                                                      |
| Wu 2017      | Radiotherapy                                        | 3  | 0/0/3   | 21.4% |                                                                                 | Recurrent tumors                                                                                                                                          |                                                                                                                                                                                                                                      |
| Raco 2017    | None                                                | 0  |         | 0%    |                                                                                 |                                                                                                                                                           |                                                                                                                                                                                                                                      |
| Lonjon 2016  | Radiotherapy (n=4), Stereotactic radiosurgery (n=1) | 5  | 0/3/2   | 21%   | - 24Gy (SRS)<br>- 50Gy<br>- 50Gy<br>- 50Gy<br>- 65Gy                            | Recurrent tumors; residual tumor around the vertebral artery; and WHO grade II                                                                            | Further recurrence was observed in 2/5, both had received radiotherapy.                                                                                                                                                              |
| Ye 2016      | Radiotherapy                                        | 1  | 0/1/0   | 4%    |                                                                                 | Simpson grade 2 resection                                                                                                                                 | The patient experienced local recurrence and died                                                                                                                                                                                    |
| Golanov 2015 | Stereotactic radiosurgery                           | 27 | 17/0/10 | 100%  | Mean dose per fraction: 15.9 Gy (14.1-16.2 Gy)                                  | Minimal to no neurological symptoms associated with tumor; Remnant/recurrent tumor or continued tumor growth after surgery; Contraindications for surgery | Total or partial tumor control was achieved in all patients and none of the patients experienced continued growth (mean follow-up: 18.6 months)<br>All patients had either stable or improved neurological status after radiosurgery |
| Lee 2015     | Stereotactic radiosurgery                           | 11 | 6/4/1   | 100%  | Median prescribed dose: 26 Gy (22–30 Gy)<br>Median number of fractions: 3 (2-4) |                                                                                                                                                           | Tumor control was achieved in all patients (mean follow-up: 46.9 months).<br>One patient experienced radiation-induced cord toxicity.<br>T2-signal intensity either regressed                                                        |

|                  |                           |    |       |      |                                           |                                                                                                  |                                                                                                                                                                                                                                                                |
|------------------|---------------------------|----|-------|------|-------------------------------------------|--------------------------------------------------------------------------------------------------|----------------------------------------------------------------------------------------------------------------------------------------------------------------------------------------------------------------------------------------------------------------|
|                  |                           |    |       |      |                                           |                                                                                                  | or stabilized in most patients after the procedure.                                                                                                                                                                                                            |
| Aboul-Enein 2015 | Radiotherapy              | 1  | 0/1/0 | 6.2% |                                           | Atypical (WHO II) spinal meningioma                                                              | The patient experienced recurrence even through both surgery and adjuvant radiation                                                                                                                                                                            |
| Sun 2015         | Radiotherapy              | 2  | 0/2/0 | 10%  | - 1.8Gy<br>- 54.8Gy                       | WHO grade II spinal meningiomas                                                                  | One patient had to stop early on due to complication in the form of worsening lower extremity sensory loss and ataxia while the other sustained arachnoiditis 6 months after radiotherapy                                                                      |
| Tsuda 2014       | Radiotherapy              | 1  | 0/1/0 | 7.1% | 50Gy                                      | High MIB-1 labeling index (8%) and Subtotal resection (Simpson grade 4)                          |                                                                                                                                                                                                                                                                |
| Riad 2013        | None                      | 0  |       | 0%   |                                           |                                                                                                  |                                                                                                                                                                                                                                                                |
| Kufeld 2012      | Stereotactic radiosurgery | 11 | 4/3/4 | 100% | Median prescription dose: 14 Gy (13-15Gy) | Remnant/recurrent or multiple spinal meningiomas                                                 | There were no recurrences (median follow-up: 18 months). In most patients either improvement or stabilization of clinical status were achieved. Only one patient experienced transient neurological worsening. Some patients experienced nausea after therapy. |
| Wang 2012        | Radiotherapy              | 1  | 0/1/0 | 10%  |                                           | Radiotherapy was considered in cases of higher WHO grades after incomplete removal or recurrence |                                                                                                                                                                                                                                                                |



|                |                                                        |    |        |       |                                                      |                                                                                                                                                                             |                                                                                                                                           |
|----------------|--------------------------------------------------------|----|--------|-------|------------------------------------------------------|-----------------------------------------------------------------------------------------------------------------------------------------------------------------------------|-------------------------------------------------------------------------------------------------------------------------------------------|
|                |                                                        |    |        |       |                                                      | in children who were more than 5 years old                                                                                                                                  |                                                                                                                                           |
| Postalci 2011  | None                                                   | 0  |        | 0%    |                                                      |                                                                                                                                                                             |                                                                                                                                           |
| Engelhard 2010 | Radiotherapy                                           | 1  | 0/1/0  | 1%    |                                                      |                                                                                                                                                                             |                                                                                                                                           |
| Gerszten 2008  | Stereotactic radiosurgery                              | 13 | 2/2/11 | 100%  | Mean maximum tumor dose (Dmax): 2125Gy (1750–2500Gy) | Patients for whom microsurgical resection was contraindicated, tumors that recurred, underlying neurofibromatosis (NF) with multiple lesions, or strong patient preferences | Tumor control was achieved in all patients (median follow-up: 37 months). One patient experienced radiation-induced spinal cord toxicity. |
| Schröder 2008  | Radiotherapy                                           | 1  | 0/1/0  | 3.3%  |                                                      | Atypical (WHO II) spinal meningiomas                                                                                                                                        |                                                                                                                                           |
| Yoon 2007      | Radiotherapy                                           | 4  | 0/4/0  | 10.5% |                                                      | Inoperable tumors with high risk of complication, higher WHO grade meningiomas and with subtotal resection (Simpson grade 4)                                                |                                                                                                                                           |
| Setzer 2007    | Chemotherapy (n=1),<br>Radiotherapy (n=2),<br>Combined | 5  | 0/5/0  | 6.3%  |                                                      |                                                                                                                                                                             |                                                                                                                                           |

|                  |                                                             |   |       |       |  |                  |                                                                                                      |
|------------------|-------------------------------------------------------------|---|-------|-------|--|------------------|------------------------------------------------------------------------------------------------------|
|                  | chemoradiotherapy (n=1),<br>Stereotactic radiosurgery (n=1) |   |       |       |  |                  |                                                                                                      |
| Schaller<br>2005 | Radiotherapy                                                | 5 | 0/5/0 | 15.2% |  |                  | There were neither any long-term side effects of radiation therapy nor any recurrence of the tumors. |
| Gezen<br>2000    | Radiotherapy                                                | 2 | 0/2/0 | 5.6%  |  | Tumor recurrence | No further recurrence observed.                                                                      |

**Table S9.** Surgical treatment of spinal meningniomas

| Study ID                  | Number of tumors operated | Surgical classification (Simpson, Saito, or arbitrary)    | Simpson grade 1 | Simpson grade 2 | Simpson grade 3 | Simpson grade 4 | Simpson grade 5 | Mean duration of surgery (mins)                               |
|---------------------------|---------------------------|-----------------------------------------------------------|-----------------|-----------------|-----------------|-----------------|-----------------|---------------------------------------------------------------|
| Ampie 2021                | 46                        | Simpson                                                   | 10.87%          | 43.48%          | 28.26%          | 17.39%          | 0.00%           |                                                               |
| Aoyama 2021               | 15                        | Simpson                                                   | 0.00%           | 100.00%         | 0.00%           | 0.00%           | 0.00%           |                                                               |
| Baro 2021                 | 90                        | Simpson                                                   | 8.89%           | 77.78%          | 11.11%          | 2.22%           | 0.00%           |                                                               |
| Corell 2021               | 111                       | Simpson                                                   | 0.00%           | 100.00%         | 0.00%           | 0.00%           | 0.00%           |                                                               |
| Davarski 2021             | 31                        | Simpson                                                   | 93.55%          |                 | 3.23%           | 3.23%           | 0.00%           |                                                               |
| Kilinc 2021               | 119                       | Simpson                                                   | 86.55%          |                 | 0.00%           | 13.45%          |                 | 185                                                           |
| Kobayashi 2021            | 116                       | Simpson                                                   | 25.00%          | 68.10%          | 3.45%           | 3.45%           | 0.00%           |                                                               |
| Kobayashi 2021            | 53                        | Gross total resection in 100%                             | n/a             | n/a             | n/a             | n/a             | n/a             | 214 ± 68<br>(longer in calcified tumors, but not significant) |
| Krauss 2021               | 17                        | Simpson (4 had unknown resection grade)                   | 5.88%           | 11.76%          | 41.18%          | 17.65%          | 0.00%           |                                                               |
| Ono K. 2021               | 24                        | Simpson                                                   | 70.83%          | 29.17%          | 0.00%           | 0.00%           | 0.00%           |                                                               |
| Pettersson-Segerlind 2021 | 129                       | Simpson                                                   | 0.00%           | 71.32%          | 13.18%          | 15.50%          | 0.00%           |                                                               |
| Saiwai 2021               | 38                        | Simpson grade 2 (group 1, n=26) vs. Saito (group 2, n=12) | n/a             | n/a             | n/a             | n/a             | n/a             |                                                               |
| Tominaga 2021             | 29                        | Simpson (group 1, n=19)                                   | n/a             | n/a             | n/a             | n/a             | n/a             |                                                               |

|                     |     | vs.<br>Saito (group 2, n=10)        |        |        |        |        |       |                                                                                                                                                                                                                                                            |
|---------------------|-----|-------------------------------------|--------|--------|--------|--------|-------|------------------------------------------------------------------------------------------------------------------------------------------------------------------------------------------------------------------------------------------------------------|
| Wach 2021           | 123 | Simpson                             | 47.97% | 47.97% | 2.44%  | 1.63%  | 0.00% | Median: 178.9 (range: 130.0–204.0)                                                                                                                                                                                                                         |
| Han 2020            | 20  | Simpson                             | 0.00%  | 80.00% | 20.00% | 0.00%  | 0.00% |                                                                                                                                                                                                                                                            |
| Hohenberger<br>2020 | 45  | Simpson                             | 13.33% | 80.00% | 6.67%  | 0.00%  | 0.00% | 233 (range: 106–362)                                                                                                                                                                                                                                       |
| Kwee 2020           | 159 | Simpson                             | 20.75% | 60.38% | 7.55%  | 11.32% | 0.00% |                                                                                                                                                                                                                                                            |
| Naito 2020          | 70  | Simpson                             | 14.29% | 74.29% | 0.00%  | 11.43% | 0.00% |                                                                                                                                                                                                                                                            |
| Voldřich 2020       | 92  | Simpson                             | 0.00%  | 91.30% | 8.70%  | 0.00%  | 0.00% |                                                                                                                                                                                                                                                            |
| Elkakatny 2019      | 45  | Total in 86.7%<br>Subtotal in 13.3% | n/a    | n/a    | n/a    | n/a    | n/a   |                                                                                                                                                                                                                                                            |
| Li 2019             | 12  | Simpson                             | 75.00% |        | 25.00% |        | 0.00% |                                                                                                                                                                                                                                                            |
| Noh 2019            | 13  | Simpson                             | 30.77% | 69.23% | 0.00%  | 0.00%  | 0.00% |                                                                                                                                                                                                                                                            |
| Xu 2019             | 17  | Not mentioned                       | n/a    | n/a    | n/a    | n/a    | n/a   | 153.2 (range: 115-300)                                                                                                                                                                                                                                     |
| Gilard 2018         | 87  | Simpson                             | 5.75%  | 87.36% | 5.75%  | 1.15%  | 0.00% |                                                                                                                                                                                                                                                            |
| Hua 2018            | 194 | Simpson                             | 30.93% | 65.46% | 3.61%  | 0.00%  | 0.00% |                                                                                                                                                                                                                                                            |
| Onken 2018          | 207 | Simpson                             | n/a    | >90%   | n/a    | n/a    | n/a   | Through unilateral posterior approach (with hemilaminectomy):<br>- 136 for anterior tumors<br>- 131 for posterior ones<br>Through bilateral posterior approach (with laminectomy or laminotomy):<br>- 224 for anterior tumors<br>- 148 for posterior ones. |
| Santos 2018         | 51  | Simpson                             | 41.18% | 45.10% | 7.84%  | 5.88%  | 0.00% |                                                                                                                                                                                                                                                            |

|                  |     |                                                                                            |        |        |        |        |       |                                                                                     |
|------------------|-----|--------------------------------------------------------------------------------------------|--------|--------|--------|--------|-------|-------------------------------------------------------------------------------------|
| Schwake 2018     | 84  | Simpson                                                                                    | 14.29% | 64.29% | 16.67% | 4.76%  | 0.00% |                                                                                     |
| Bayoumi 2017     | 58  | Simpson                                                                                    | 98.28% |        |        | 0.00%  | 1.72% |                                                                                     |
| Notani 2017      | 12  | Simpson                                                                                    | 16.67% | 83.33% | 0.00%  | 0.00%  | 0.00% | 218 (range: 115–315)                                                                |
| Raco 2017        | 173 | Simpson                                                                                    | 30.06% | 68.79% | 1.16%  | 0.00%  | 0.00% |                                                                                     |
| Wu 2017          | 14  | Gross total resection in 78.5%<br>Subtotal resection in 14.2%<br>Partial resection in 7.3% | n/a    | n/a    | n/a    | n/a    | n/a   |                                                                                     |
| Kim 2016         | 73  | Simpson                                                                                    | 28.77% | 36.99% | 23.29% | 10.96% | 0.00% |                                                                                     |
| Lonjon 2016      | 23  | Simpson                                                                                    | 21.74% | 39.13% | 13.04% | 21.74% | 4.35% |                                                                                     |
| Maiti 2016       | 37  | Simpson                                                                                    | 5.41%  | 94.59% | 0.00%  | 0.00%  | 0.00% |                                                                                     |
| Pompili 2016     | 29  | Simpson                                                                                    | 34.48% | 65.52% | 0.00%  | 0.00%  | 0.00% | 160 (range: 100-320) for both spinal schwannoma and meningioma surgery              |
| Tola 2016        | 20  | Simpson                                                                                    | 90.00% |        | 5.00%  | 5.00%  | 0.00% | 180 min (SD, 94; range: 90-433) with the longest occurring in calcified meningiomas |
| Ye 2016          | 25  | Simpson                                                                                    | 16.00% | 52.00% | 16.00% | 16.00% | 0.00% |                                                                                     |
| Zham 2016        | 39  | Complete resection ≈ 50%<br>Incomplete resection ≈ 50%                                     | n/a    | n/a    | n/a    | n/a    | n/a   |                                                                                     |
| Aboul-Enein 2015 | 16  | Simpson grade 2 (n=11)<br>Saito method (n=4)<br>Subtotal resection (n=1)                   | n/a    | n/a    | n/a    | n/a    | n/a   |                                                                                     |

|                   |     |                                                                             |        |        |        |        |       |                                                                                                            |
|-------------------|-----|-----------------------------------------------------------------------------|--------|--------|--------|--------|-------|------------------------------------------------------------------------------------------------------------|
| Haq 2015          | 48  | Simpson                                                                     | 0.00%  | 83.33% | 12.50% | 4.17%  | 0.00% |                                                                                                            |
| Sun 2015          | 20  | Simpson                                                                     | 15.00% | 65.00% | 10.00% | 10.00% | 0.00% |                                                                                                            |
| Arima 2014        | 23  | Simpson                                                                     | 21.74% | 56.52% | 8.70%  | 13.04% | 0.00% |                                                                                                            |
| Tsuda 2014        | 13  | Simpson                                                                     | 15.38% | 61.54% | 0.00%  | 23.08% | 0.00% |                                                                                                            |
| Riad 2013         | 15  | Simpson                                                                     | 13.33% | 86.67% | 0.00%  | 0.00%  | 0.00% |                                                                                                            |
| Barresi 2012      | 58  | Simpson                                                                     | 17.24% | 63.79% | 18.97% | 0.00%  | 0.00% |                                                                                                            |
| Iacoangeli 2012   | 65  | Saito method (group 1, n=30)<br>vs.<br>Simpson grade 1 or 2 (group 2, n=35) | n/a    | n/a    | n/a    | n/a    | n/a   | group 1 (hemilaminectomy + Saito method): 145 min<br>group 2 (laminectomy + Simpson grade 1 or 2): 171 min |
| Nakamura 2012     | 68  | Simpson                                                                     | 63.24% | 27.94% | 4.41%  | 4.41%  | 0.00% |                                                                                                            |
| Wang 2012         | 10  | Simpson                                                                     | 60.00% | 20.00% | 10.00% | 10.00% | 0.00% |                                                                                                            |
| Maiuri 2011       | 117 | Simpson                                                                     | 0.00%  | 94.87% | 5.13%  |        |       |                                                                                                            |
| Postalci 2011     | 35  | Simpson                                                                     | 65.71% | 11.43% | 14.29% | 8.57%  | 0.00% |                                                                                                            |
| Sacko 2009        | 102 | Total in 91%<br>Subtotal in 9%                                              | n/a    | n/a    | n/a    | n/a    | n/a   |                                                                                                            |
| Boström 2008      | 61  | Simpson                                                                     | 8.20%  | 91.80% | 0.00%  | 0.00%  | 0.00% |                                                                                                            |
| Sandalcioglu 2008 | 131 | Simpson                                                                     | 96.95% |        | 3.05%  | 0.00%  | 0.00% |                                                                                                            |
| Schröder 2008     | 30  | Total in 90%<br>Subtotal in 10%                                             | n/a    | n/a    | n/a    | n/a    | n/a   |                                                                                                            |
| Setzer 2007       | 80  | Simpson                                                                     | 5.00%  | 88.75% | 1.25%  | 5.00%  | 0.00% |                                                                                                            |
| Yoon 2007         | 38  | Simpson (1 had unknown resection grade)                                     | 26.32% | 44.74% | 10.53% | 15.79% | 0.00% |                                                                                                            |

|                     |    |                                                               |        |     |        |     |       |                     |
|---------------------|----|---------------------------------------------------------------|--------|-----|--------|-----|-------|---------------------|
| Haegelen 2005       | 33 | Total in 94%<br>Subtotal in 6%                                | n/a    | n/a | n/a    | n/a | n/a   |                     |
| Peker 2005          | 41 | Total in 98%<br>Subtotal in 2%                                | n/a    | n/a | n/a    | n/a | n/a   |                     |
| Schaller 2005       | 33 | Simpson                                                       | 84.85% |     | 15.15% |     | 0.00% |                     |
| Morandi 2004        | 30 | Total in 90%,<br>Subtotal in 10%                              | n/a    | n/a | n/a    | n/a | n/a   | 119 (range: 50–250) |
| Gambardella<br>2003 | 10 | Complete vs.<br>incomplete resection<br>(unclear proportions) | n/a    | n/a | n/a    | n/a | n/a   | <240 in all cases   |
| Schick 2001         | 81 | Total in 96.3%<br>Subtotal in 3.7%                            | n/a    | n/a | n/a    | n/a | n/a   |                     |
| Gezen 2000          | 36 | Total in 97%,<br>Subtotal in 3%                               | n/a    | n/a | n/a    | n/a | n/a   |                     |

**Table S10.** Intraoperative neuromonitoring

| Study ID                  | Indications for IONM and/or author's opinion                                                                                                                                                                                                                                                                                                                                                                        | kind of IONM                              | Frequency of IONM use |
|---------------------------|---------------------------------------------------------------------------------------------------------------------------------------------------------------------------------------------------------------------------------------------------------------------------------------------------------------------------------------------------------------------------------------------------------------------|-------------------------------------------|-----------------------|
| Davarski 2021             | Meningioma with intramedullary infiltration mainly warranted the use of IONM                                                                                                                                                                                                                                                                                                                                        | not mentioned                             | 3.20%                 |
| Ampie 2021                | Certain types of IONM signal disruption correlated with postoperative motor deficiencies                                                                                                                                                                                                                                                                                                                            | not mentioned                             | 78.70%                |
| Kilinc 2021               | Not mentioned                                                                                                                                                                                                                                                                                                                                                                                                       | Somatosensory and motor-evoked potentials | 100%                  |
| Baro 2021                 | May be useful in spinal meningioma resection, but it is not mandatory to achieve a safe resection.                                                                                                                                                                                                                                                                                                                  | not mentioned                             | 46.70%                |
| Pettersson-Segerlind 2021 | IONM was not used due to limited availability.<br>It was also deemed more important in intramedullary rather than extramedullary spinal tumors.                                                                                                                                                                                                                                                                     | n/a                                       | n/a                   |
| Kobayashi 2021            | The technology acted as an intraoperative guide for when to pause the surgery and reassess for the appropriate extent of resection.<br>In some cases, deterioration on IOM prompted interruption of the surgery without achievement of the desired extent of resection.                                                                                                                                             | not mentioned                             | not mentioned         |
| Wach 2021                 | "Intraoperative neuromonitoring is an essential tool in the modern era of neurosurgery to prevent worsening of neurological outcome during surgery.<br>The present study analyzes a large institutional series between 2000 and 2019. However, we have not included intraoperative neuromonitoring data for analysis due to changes in the medical devices, interobserver bias and incomplete neuromonitoring data" | not mentioned                             | not mentioned         |
| Kwee 2020                 | Preliminary positive results were related to the use of IOM; however, the effect sizes were too small to justify its utilization in spinal meningioma surgery.<br>Moreover, it was noted that IOM was used on ventral tumors to a higher extent.                                                                                                                                                                    | not mentioned                             | 20%                   |



|                  |                                                                                                                                                                                                                                                                                                                                                                                                         |                                                                                                         |                                                                                                                       |
|------------------|---------------------------------------------------------------------------------------------------------------------------------------------------------------------------------------------------------------------------------------------------------------------------------------------------------------------------------------------------------------------------------------------------------|---------------------------------------------------------------------------------------------------------|-----------------------------------------------------------------------------------------------------------------------|
| Han 2020         | Not mentioned                                                                                                                                                                                                                                                                                                                                                                                           | Somatosensory and motor-evoked potentials                                                               | 100%                                                                                                                  |
| Voldřich 2020    | Not mentioned                                                                                                                                                                                                                                                                                                                                                                                           | not mentioned                                                                                           | 100%                                                                                                                  |
| Hohenberger 2020 | IOM whenever feasible should be performed                                                                                                                                                                                                                                                                                                                                                               | D-waves, somatosensory-evoked potentials, motor-evoked potentials                                       | 44.40%                                                                                                                |
| Elkatatny 2019   | The use of IOM could not be associated to improved surgical outcomes or reduced postoperative complications                                                                                                                                                                                                                                                                                             | Somatosensory and motor-evoked potentials                                                               | 100%                                                                                                                  |
| Noh 2019         | Not mentioned                                                                                                                                                                                                                                                                                                                                                                                           | Somatosensory and motor-evoked potentials                                                               | not mentioned                                                                                                         |
| Xu 2019          | Not mentioned                                                                                                                                                                                                                                                                                                                                                                                           | Somatosensory and motor-evoked potentials                                                               | 100%                                                                                                                  |
| Hua 2018         | Not mentioned                                                                                                                                                                                                                                                                                                                                                                                           | Somatosensory-evoked potentials                                                                         | 100%                                                                                                                  |
| Schwake 2018     | Not mentioned                                                                                                                                                                                                                                                                                                                                                                                           | not mentioned                                                                                           | 56%                                                                                                                   |
| Wu 2017          | Not mentioned                                                                                                                                                                                                                                                                                                                                                                                           | Somatosensory and motor-evoked potentials                                                               | 100%                                                                                                                  |
| Notani 2017      | Not mentioned                                                                                                                                                                                                                                                                                                                                                                                           | Motor-evoked potentials                                                                                 | 100%                                                                                                                  |
| Harel 2017       | In this series, the rate of neurological deficits in cases with vs. without IONM is virtually the same, which raises questions about the role of IONM in preventing new neurological deficits<br>No hard evidence warrants the use of IONM for the resection of intradural extramedullary tumors, hence prospective randomized trials comparing the results with and without the use of IONM are needed | Transcranial motor-evoked potentials, somatosensory-evoked potential, and free running electromyography | - 100% of study group (41 tumors, with both meningiomas and nerve sheath tumors)<br>- 0% of control group (70 tumors) |
| Pompili 2016     | Stimulation was used to identify the unaffected rootlets in lumbar and cervical lesions. This allowed safer dissection of the tumor from the main root.                                                                                                                                                                                                                                                 | Somatosensory and motor-evoked potentials                                                               | 100%                                                                                                                  |
| Lonjon 2016      | Not mentioned                                                                                                                                                                                                                                                                                                                                                                                           | Somatosensory and motor-evoked potentials                                                               | 100%                                                                                                                  |

|                   |                                                                                                                                                                          |                                                                                                         |               |
|-------------------|--------------------------------------------------------------------------------------------------------------------------------------------------------------------------|---------------------------------------------------------------------------------------------------------|---------------|
| Tola 2016         | IONM prompted a surgical alert when the nerve root was irritated. In such situations, transcranial motor evoked potentials were also used to identify amplitude changes. | not mentioned                                                                                           | 100%          |
| Maiti 2016        | Complete resection could be achieved without IOM                                                                                                                         | Somatosensory and/or motor evoked potentials                                                            | rarely used   |
| Haq 2015          | The authors advocated the use of IONM but do not mention any use of the technology themselves.                                                                           | n/a                                                                                                     | n/a           |
| Aboul-Enein 2015  | Surgical manipulations were stopped whenever any major IONM changes were observed                                                                                        | Somatosensory-evoked potentials                                                                         | 100%          |
| Sun 2015          | Not mentioned                                                                                                                                                            | not mentioned                                                                                           | 100%          |
| Turel 2015        | Motor evoked potentials were more reliable than somatosensory ones and were hence used in all cases at the authors' institution.                                         | Motor-evoked potentials                                                                                 | 100%          |
| Tsuda 2014        | IONM can warn surgeons of an impending possibility of permanent damage.                                                                                                  | Motor-evoked potentials                                                                                 | not mentioned |
| Iacoangeli 2012   | Not mentioned                                                                                                                                                            | Transcranial motor-evoked potentials, somatosensory-evoked potential, and free running electromyography | 100%          |
| Voulgaris 2010    | Neurophysiology specialist was available during operations                                                                                                               | Transcranial motor-evoked potentials, somatosensory-evoked potential, and free running electromyography | 100%          |
| Sandalcioglu 2008 | Not mentioned                                                                                                                                                            | Somatosensory-evoked potentials                                                                         | 100%          |
| Boström 2008      | Not mentioned                                                                                                                                                            | not mentioned                                                                                           | 100%          |

IONM = Intraoperative neuromonitoring, n/a = Not applicable

**Table S11.** Perioperative complications

| Study ID                  | Number of tumors operated | Ibanez 1 | Ibanez 2 | Ibanez 3 | Ibanez 4 | Nature of complication not disclosed | Complication rate | Complications by order of frequency                                                                                                                                    |
|---------------------------|---------------------------|----------|----------|----------|----------|--------------------------------------|-------------------|------------------------------------------------------------------------------------------------------------------------------------------------------------------------|
| Corell 2021               | 111                       | 16       | 7        | 0        | 0        | 0                                    | 20.72%            | CSF leak was the most common complication, the rest was not stated                                                                                                     |
| Ampie 2021                | 46                        | 9        | 2        | 0        | 0        | 0                                    | 23.91%            | 1) New neurological deficit<br>2) Pulmonary embolism; Anemia requiring transfusion; Altered mental status; Hematomyelia & hemorrhagic infarct during surgery; CSF leak |
| Pettersson-Segerlind 2021 | 129                       | 7        | 2        | 1        | 0        | 0                                    | 7.75%             | 1) Wound infection<br>2) CSF leak; Kyphosis<br>3) Myocardial infarction; Tethered spinal cord; Pneumonia                                                               |
| Krauss 2021               | 17                        | 5        | 1        | 1        | 0        | 0                                    | 41.18%            | 1) CSF leak; Wound infection; Syringomyelia; Meningitis; Neck pain at surgery site; Paraparesis; Cervical deformity                                                    |
| Baro 2021                 | 90                        | 5        | 7        | 0        | 0        | 0                                    | 13.33%            | 1) CSF leak<br>2) Hemorrhage<br>3) Wound dehiscence                                                                                                                    |
| Kobayashi 2021            | 116                       | 3        | 3        | 0        | 0        | 0                                    | 5.17%             | 1) CSF leak; Wound infection requiring surgery (simultaneously in all 3 patients)                                                                                      |
| Kilinc 2021               | 119                       | 2        | 9        | 0        | 0        | 0                                    | 9.24%             | 1) CSF leak<br>2) Wound infection<br>3) Postoperative hematoma; Pulmonary embolism                                                                                     |

|                  |     |    |    |   |   |   |        |                                                                                                                                                                                                                                                                                                                                                                           |
|------------------|-----|----|----|---|---|---|--------|---------------------------------------------------------------------------------------------------------------------------------------------------------------------------------------------------------------------------------------------------------------------------------------------------------------------------------------------------------------------------|
| Davarski 2021    | 31  | 1  | 0  | 0 | 0 | 0 | 3.23%  | 1) Hemorrhagic stroke that resolved after conservative treatment                                                                                                                                                                                                                                                                                                          |
| Saiwai 2021      | 38  | 1  | 0  | 0 | 0 | 0 | 2.63%  | 1) CSF leak                                                                                                                                                                                                                                                                                                                                                               |
| Wach 2021        | 123 | 1  | 11 | 0 | 0 | 0 | 9.76%  | 1) CSF leak<br>2) Epidural hematoma<br>3) Wound infection; Epidural abscess;                                                                                                                                                                                                                                                                                              |
| Kwee 2020        | 159 | 30 | 4  | 4 | 3 | 0 | 25.79% | 1) CSF leakage<br>2) Postoperative wound infection<br>3) Respiratory insufficiency<br>4) Hyperglycemia; Wound-associated pain; Urinary tract infection; Death<br>5) Pulmonary embolus; Ileus; Cardiac decompensation<br>6) Syrinx formation; Myelum edema with hydrocephalus and secondary meningitis; Skin defect requiring grafting; Seizure; Hypertension; Hypotension |
| Voldřich 2020    | 92  | 8  | 11 | 0 | 0 | 0 | 20.65% | 1) Epidural hematoma; CSF leak<br>2) Wound infection;<br>3) Laminectomy malposition; Spinal kyphosis; Myelodural adhesions                                                                                                                                                                                                                                                |
| Hohenberger 2020 | 45  | 5  | 2  | 0 | 0 | 0 | 15.56% | 1) New neurological deficit<br>2) CSF leak; and Wound infection both requiring surgery                                                                                                                                                                                                                                                                                    |
| Han 2020         | 20  | 1  | 0  | 0 | 0 | 0 | 5.00%  | 1) Fever (presumed to be from a meningitis)                                                                                                                                                                                                                                                                                                                               |
| Elkatatny 2019   | 45  | 7  | 5  | 0 | 0 | 0 | 26.67% | 1) CSF leak; New neurological deficit                                                                                                                                                                                                                                                                                                                                     |
| Xu 2019          | 17  | 2  | 0  | 0 | 0 | 0 | 11.76% | 1) CSF leak                                                                                                                                                                                                                                                                                                                                                               |
| Li 2019          | 12  | 0  | 0  | 0 | 0 | 0 | 0.00%  | None                                                                                                                                                                                                                                                                                                                                                                      |

|              |     |    |   |   |   |   |        |                                                                                                                                          |
|--------------|-----|----|---|---|---|---|--------|------------------------------------------------------------------------------------------------------------------------------------------|
| Schwake 2018 | 84  | 8  | 3 | 1 | 0 | 0 | 14.29% | 1) CSF leak<br>2) Urinary tract infection; Wound dehiscence;<br>Decompensated heart failure<br>3) Stroke; Pulmonary embolism; Pneumonia  |
| Onken 2018   | 207 | 8  | 2 | 0 | 0 | 0 | 4.83%  | 1) Bleeding<br>2) CSF leak<br>3) Wound dehiscence                                                                                        |
| Santos 2018  | 51  | 3  | 1 | 1 | 0 | 0 | 9.80%  | 1) Syringomyelia<br>2) CSF leak; Cerebral thrombosis; Coma                                                                               |
| Gilard 2018  | 87  | 0  | 2 | 0 | 2 | 0 | 4.60%  | 1) Death from pulmonary embolism or acute<br>coronary syndrome<br>2) Wound infection; and Hematoma both<br>requiring surgery             |
| Hua 2018     | 194 | 0  | 9 | 0 | 0 | 0 | 4.64%  | 1) CSF leak<br>2) Hematoma managed surgically                                                                                            |
| Raco 2017    | 173 | 11 | 4 | 0 | 0 | 0 | 8.67%  | 1) Spinal cord iatrogenic injury<br>2) CSF leak<br>2) Spinal epidural hematoma<br>3) Syringomyelia; Adverse reaction to dural<br>sealant |
| Notani 2017  | 12  | 1  | 0 | 0 | 0 | 0 | 8.33%  | 1) CSF leak                                                                                                                              |
| Wu 2017      | 14  | 0  | 2 | 0 | 0 | 0 | 14.29% | 1) Intraspinal infection                                                                                                                 |
| Maiti 2016   | 37  | 4  | 2 | 0 | 0 | 0 | 16.22% | 1) Wound complication<br>2) CSF leak                                                                                                     |
| Lonjon 2016  | 23  | 0  | 3 | 0 | 1 | 2 | 26.09% | 1) CSF leak; Epidural abscess; Tumor resection<br>revision; Death                                                                        |
| Ye 2016      | 25  | 0  | 1 | 0 | 0 | 0 | 4.00%  | 1) CSF leak                                                                                                                              |
| Kim 2016     | 73  | 0  | 2 | 0 | 0 | 0 | 2.74%  | 1) CSF leak                                                                                                                              |

|                  |       |    |   |   |   |     |        |                                                                                                                                                     |
|------------------|-------|----|---|---|---|-----|--------|-----------------------------------------------------------------------------------------------------------------------------------------------------|
| Tola 2016        | 20    | 0  | 0 | 0 | 0 | 0   | 0.00%  | None                                                                                                                                                |
| Haq 2015         | 48    | 8  | 0 | 0 | 0 | 0   | 16.67% | 1) CSF leak managed conservatively<br>2) Wound infection, Syring formation and spinal cord trauma                                                   |
| Aboul-Enein 2015 | 16    | 7  | 1 | 0 | 0 | 0   | 50.00% | 1) New neurological deficits<br>2) CSF leak                                                                                                         |
| Sun 2015         | 20    | 1  | 0 | 0 | 0 | 0   | 5.00%  | 1) Iatrogenic anterior spinal cord (T5-T7) infarction                                                                                               |
| Tsuda 2014       | 13    | 0  | 1 | 0 | 0 | 0   | 7.69%  | 1) Reoperation due to tight dural closure                                                                                                           |
| Ambekar 2014     | 13698 | 0  | 0 | 0 | 0 | 891 | 6.50%  | 1) Neurologic complications<br>2) Urinary and renal<br>3) Hemorrhages and hematomas<br>4) Pulmonary<br>5) Cardiac<br>6) Thromboembolic<br>7) Deaths |
| Riad 2013        | 15    | 2  | 1 | 0 | 0 | 0   | 20.00% | 1) Epidural hematoma requiring surgery; Deep vein thrombosis; CSF leak managed pharmacologically                                                    |
| Iacoangeli 2012  | 65    | 16 | 7 | 0 | 0 | 0   | 35.38% | 1) Long-term back pain<br>2) CSF leak<br>3) Instability requiring fixation<br>4) Pulmonary embolism                                                 |
| Postalci 2011    | 35    | 4  | 3 | 0 | 0 | 0   | 20.00% | 1) New (transient) neurological deficit<br>2) CSF leak                                                                                              |
| Sacko 2009       | 102   | 8  | 1 | 0 | 0 | 0   | 8.82%  | 1) Urinary tract infection<br>2) Phlebitis; Pneumonia; Wound infection; CSF leak                                                                    |

|                   |     |   |   |   |   |   |        |                                                                                                                                                                                       |
|-------------------|-----|---|---|---|---|---|--------|---------------------------------------------------------------------------------------------------------------------------------------------------------------------------------------|
| Sandalcioglu 2008 | 131 | 4 | 0 | 0 | 1 | 0 | 3.82%  | 1) Venous thrombosis<br>2) CSF leak; Wound dehiscence; Death from myocardial infarction                                                                                               |
| Schröder 2008     | 30  | 0 | 3 | 0 | 0 | 0 | 10.00% | 1) CSF leak<br>2) CSF flow disturbance                                                                                                                                                |
| Boström 2008      | 61  | 0 | 2 | 0 | 0 | 0 | 3.28%  | 1) Pseudomeningocele with CSF leak; and Wound infection both requiring surgery                                                                                                        |
| Yoon 2007         | 38  | 2 | 2 | 0 | 0 | 0 | 10.53% | 1) CSF leak; Syrinx formation and spinal cord trauma                                                                                                                                  |
| Setzer 2007       | 80  | 1 | 2 | 0 | 1 | 0 | 5.00%  | 1) CSF leak<br>2) Wound infection; Death from pulmonary embolism                                                                                                                      |
| Haegelen 2005     | 33  | 2 | 0 | 0 | 0 | 0 | 6.06%  | 1) Phlebitis; Pneumonia                                                                                                                                                               |
| Morandi 2004      | 30  | 1 | 0 | 0 | 0 | 0 | 3.33%  | 1) Pneumonia                                                                                                                                                                          |
| Cohen-Gadol 2003  | 80  | 6 | 6 | 1 | 1 | 0 | 17.50% | 1) New neurological deficits<br>2) Pseudomeningocele; CSF leak; Spinal instability<br>3) Wound infection and revision; Hydrocephalus requiring drainage; Death of respiratory failure |
| Gambardella 2003  | 10  | 0 | 1 | 0 | 0 | 0 | 10.00% | 1) CSF leak                                                                                                                                                                           |
| Gezen 2000        | 36  | 2 | 1 | 0 | 1 | 0 | 11.11% | 1) Wound infection<br>2) CSF leak; perioperative death following a pulmonary embolism                                                                                                 |

**Table S12.** Neurological outcomes

| Study ID                  | Assessment of functional/neurological status                                                                                        | Preop MCS 1 + 2 | Preop MCS 3 + 4 + 5 | Postop MCS 1+2 | Postop MCS 3 + 4 + 5 | Preop Frankel D + E | Preop Frankel A + B + C | Postop Frankel D + E | Postop Frankel A + B + C | Worsened neurologic status | Unchanged status | Improved status | Mean length of hospital stay (days) |
|---------------------------|-------------------------------------------------------------------------------------------------------------------------------------|-----------------|---------------------|----------------|----------------------|---------------------|-------------------------|----------------------|--------------------------|----------------------------|------------------|-----------------|-------------------------------------|
| Champeaux-Depond 2022     | Based on predetermined criteria, such as independence at home, hospitalization, and rehabilitation...                               |                 |                     |                |                      |                     |                         |                      |                          |                            |                  |                 | 8, (range: 7-13)                    |
| Kobayashi 2021            | Modified McCormick Scale                                                                                                            | 67              | 49                  | 96             | 20                   |                     |                         |                      |                          | 9                          | 34               | 73              |                                     |
| Pettersson-Segerlind 2021 | Modified McCormick Scale<br>American Society of Anesthesiologists (ASA)                                                             | 80              | 49                  |                |                      |                     |                         |                      |                          | 2                          | 66               | 61              |                                     |
| Wach 2021                 | Modified McCormick Scale<br>Karnofsky Performance Status (KPS)<br>American Society of Anesthesiologists (ASA) physical status score | 83              | 40                  | 91             | 31                   |                     |                         |                      |                          |                            |                  |                 |                                     |
| Corell 2021               | Modified McCormick Scale<br>Karnofsky performance status (KPS)                                                                      | 49              | 62                  | 74             | 36                   |                     |                         |                      |                          | 3                          | 48               | 59              |                                     |



|                |                                                                                                                                     |    |    |    |    |  |  |  |  |    |    |     |                           |
|----------------|-------------------------------------------------------------------------------------------------------------------------------------|----|----|----|----|--|--|--|--|----|----|-----|---------------------------|
| Baro 2021      | Modified McCormick Scale                                                                                                            | 53 | 37 | 75 | 15 |  |  |  |  | 8  | 29 | 53  |                           |
| Kilinc 2021    | Eastern Cooperative Oncology Group (ECOG) performance status<br>ASA (American Society of Anesthesiologists) Physical Classification |    |    |    |    |  |  |  |  | 9  | 41 | 72  | 7.7                       |
| Tominaga 2021  | Japanese Orthopedic Association score (JOA)                                                                                         |    |    |    |    |  |  |  |  | 0  | 0  | 29  |                           |
| Davarski 2021  | Modified McCormick Scale<br>Medical Research Council (MRC) grading system                                                           | 2  | 29 | 15 | 15 |  |  |  |  | 4  | 0  | 26  | 14.5, (range: 9-30)       |
| Kobayashi 2021 | Modified McCormick Scale<br>ASIA scale                                                                                              | 30 | 23 | 43 | 10 |  |  |  |  | 1  | 12 | 40  |                           |
| Ono K. 2021    | Unclear                                                                                                                             |    |    |    |    |  |  |  |  | 0  | 0  | 21  |                           |
| Ampie 2021     | American Society of Anesthesiologists (ASA) physical status score                                                                   |    |    |    |    |  |  |  |  | 6  | 9  | 30  | Median: 4                 |
| Krauss 2021    | Unclear                                                                                                                             |    |    |    |    |  |  |  |  | 5  |    | 10  |                           |
| Kwee 2020      | Modified Rankin Scale (mRS)<br>Karnofsky Performance Score (KPS)                                                                    |    |    |    |    |  |  |  |  | 19 | 24 | 117 | 12.3 ± 8.2, (range: 2–55) |

|                  |                                                                |     |    |     |    |  |  |  |    |     |    |                      |
|------------------|----------------------------------------------------------------|-----|----|-----|----|--|--|--|----|-----|----|----------------------|
| Hohenberger 2020 | Japanese Orthopedic Association score (JOA)                    |     |    |     |    |  |  |  | 1  | 31  | 13 |                      |
| Han 2020         | Modified McCormick Scale                                       | 12  | 6  |     |    |  |  |  | 2  | 3   | 14 |                      |
| Naito 2020       | Modified McCormick Scale<br>Sensory pain scale                 |     |    |     |    |  |  |  |    |     |    |                      |
| Voldřich 2020    | Modified McCormick Scale                                       | 44  | 40 | 70  | 14 |  |  |  | 2  | 39  | 53 |                      |
| Xu 2019          | ASIA scale<br>Visual Analogue Scale (VAS) for pain             |     |    |     |    |  |  |  | 0  | 2   | 15 | 6.8,<br>(range 5-10) |
| Elkattatny 2019  | Medical Research Council (MRC) grading system                  |     |    |     |    |  |  |  |    |     |    |                      |
| Noh 2019         | Nurick grading scheme                                          |     |    |     |    |  |  |  | 0  | 2   | 11 |                      |
| Hua 2018         | McCormick Scale                                                | 129 | 65 | 158 | 36 |  |  |  | 19 | 95  | 80 |                      |
| Schwake 2018     | Modified McCormick Scale<br>Karnofsky performance status (KPS) | 50  | 38 | 73  | 12 |  |  |  | 2  | 25  | 58 |                      |
| Gilard 2018      | McCormick Scale<br>Karnofsky Performance Score (KPS)           | 56  | 31 | 76  | 11 |  |  |  | 4  | 18  | 65 |                      |
| Santos 2018      | McCormick Scale                                                | 29  | 22 | 42  | 8  |  |  |  | 2  | 11  | 37 |                      |
| Onken 2018       | Modified McCormick Scale<br>Karnofsky Performance Score (KPS)  |     |    |     |    |  |  |  | 6  | 118 |    | 9                    |

|              |                                                                                    |    |     |     |    |    |     |     |    |    |    |     |                                                                |
|--------------|------------------------------------------------------------------------------------|----|-----|-----|----|----|-----|-----|----|----|----|-----|----------------------------------------------------------------|
| Raco 2017    | Modified McCormick Scale<br>Frankel Scale                                          | 43 | 130 | 120 | 53 | 58 | 115 | 124 | 49 | 12 | 11 | 150 |                                                                |
| Notani 2017  | Nurick grading scheme                                                              |    |     |     |    |    |     |     |    | 0  | 0  | 12  |                                                                |
| Davies 2017  | Nurick grading scheme                                                              |    |     |     |    |    |     |     |    | 3  | 0  | 25  |                                                                |
| Wu 2017      | Modified McCormick Scale                                                           | 8  | 6   | 12  | 2  |    |     |     |    | 2  | 0  | 12  |                                                                |
| Zham 2016    | Frankel Scale                                                                      |    |     |     |    | 31 | 8   | 28  | 11 | 7  | 32 |     |                                                                |
| Maiti 2016   | Modified McCormick Scale                                                           | 0  | 38  | 29  | 9  |    |     |     |    |    |    |     |                                                                |
| Pompili 2016 | Modified McCormick Scale<br>Karnofsky Performance Score (KPS)<br>Dennis Pain Scale |    |     |     |    |    |     |     |    |    |    |     | 8, (range: 5-19; for both spinal meningiomas and schwannomas). |
| Tola 2016    | McCormick Scale<br>Visual analogue scale (VAS) for pain                            | 7  | 13  | 12  | 8  |    |     |     |    | 0  | 8  | 12  | $7 \pm 2$                                                      |
| Kim 2016     | Modified McCormick Scale                                                           | 26 | 15  | 36  | 5  |    |     |     |    | 0  | 4  | 16  | $\approx 7$                                                    |
| Lonjon 2016  | McCormick Scale<br>Karnofsky Performance Score (KPS)<br>Nurick Scale               | 14 | 8   |     |    |    |     |     |    | 3  | 6  | 14  | $18 \pm 16$ , (range: 4-58)                                    |
| Ye 2016      | McCormick Scale<br>Frankel scale                                                   | 18 | 7   |     |    | 20 | 5   |     |    |    |    |     |                                                                |
| Haq 2015     | Unclear                                                                            |    |     |     |    |    |     |     |    | 2  | 9  | 37  |                                                                |
| Sun 2015     | McCormick Scale                                                                    | 1  | 19  | 19  | 1  |    |     |     |    | 1  | 0  | 19  |                                                                |

|                   |                                                                                             |    |    |    |    |    |    |     |    |   |     |    |                        |
|-------------------|---------------------------------------------------------------------------------------------|----|----|----|----|----|----|-----|----|---|-----|----|------------------------|
| Golanov 2015      | Frankel Scale<br>Karnofsky Performance Status (KPS)<br>Visual Analogue Scale (VAS) for pain |    |    |    |    | 16 | 2  | 16  | 2  | 0 | 17  | 1  |                        |
| Arima 2014        | Modified McCormick Scale<br>Sensory pain scale                                              |    |    |    |    |    |    |     |    | 1 | 8   | 14 |                        |
| Tsuda 2014        | Unclear                                                                                     |    |    |    |    |    |    |     |    | 2 | 0   | 12 |                        |
| Riad 2013         | McCormick Scale                                                                             | 11 | 4  | 14 | 1  |    |    |     |    | 0 | 2   | 13 |                        |
| Kufeld 2012       | Arbitrary score for neurological deficits<br>Visual analogue scale (VAS) for pain           |    |    |    |    |    |    |     |    |   |     |    |                        |
| Iacoangeli 2012   | Unclear                                                                                     |    |    |    |    |    |    |     |    | 3 |     | 62 | 5.83,<br>(range: 4-10) |
| Postalci 2011     | Frankel Scale                                                                               |    |    |    |    | 38 | 8  | 39  | 7  | 4 | 14  | 28 |                        |
| Sandalcioglu 2008 | Frankel Scale                                                                               |    |    |    |    | 80 | 51 | 114 | 17 | 5 | 126 |    |                        |
| Boström 2008      | Frankel Scale                                                                               |    |    |    |    | 46 | 15 | 60  | 1  | 0 | 33  | 29 |                        |
| Schröder 2008     | Neurological Scoring System according to Klekamp & Samii                                    |    |    |    |    |    |    |     |    | 1 | 7   | 22 |                        |
| Setzer 2007       | McCormick Scale                                                                             | 58 | 22 | 65 | 15 |    |    |     |    | 5 | 57  | 18 |                        |
| Yoon 2007         | Unclear                                                                                     |    |    |    |    |    |    |     |    | 2 | 6   | 30 |                        |

|                  |                                                                                   |   |   |    |   |    |   |    |    |   |   |    |  |
|------------------|-----------------------------------------------------------------------------------|---|---|----|---|----|---|----|----|---|---|----|--|
| Schaller 2005    | Medical Research Council (MRC) grading system                                     |   |   |    |   |    |   |    |    | 1 | 6 | 19 |  |
| Peker 2005       | Frankel Scale                                                                     |   |   |    |   | 35 | 6 | 11 | 30 |   |   |    |  |
| Haegelen 2005    | Levy score                                                                        |   |   |    |   |    |   |    |    | 5 | 0 | 28 |  |
| Morandi 2004     | Solero Score<br>American Society of Anesthesiologists (ASA) physical status score |   |   |    |   |    |   |    |    | 0 | 0 | 30 |  |
| Cohen-Gadol 2003 | Nurick grading scheme                                                             |   |   |    |   |    |   |    |    |   |   |    |  |
| Gambardella 2003 | McCormick scale                                                                   | 6 | 4 | 10 | 0 |    |   |    |    | 0 | 2 | 8  |  |
| Gezen 2000       | Unclear                                                                           |   |   |    |   |    |   |    |    | 1 | 5 | 35 |  |

MCS = McCormick Scale

**Table S13.** Markers of neurologic outcomes as described by the included studies

| Study ID                  | Markers of favorable neurological outcomes or postoperative improvement (p-value)                                                                                                            | Markers of unfavorable neurological outcomes (p-value)                                                                                                                                                                                                                                                                                                                                                                                                                                                                                      | Markers of postoperative deterioration (p-value)                                                                                                                                                                                                                                                                                                                   |
|---------------------------|----------------------------------------------------------------------------------------------------------------------------------------------------------------------------------------------|---------------------------------------------------------------------------------------------------------------------------------------------------------------------------------------------------------------------------------------------------------------------------------------------------------------------------------------------------------------------------------------------------------------------------------------------------------------------------------------------------------------------------------------------|--------------------------------------------------------------------------------------------------------------------------------------------------------------------------------------------------------------------------------------------------------------------------------------------------------------------------------------------------------------------|
| Champeaux-Depond 2022     | <ul style="list-style-type: none"> <li>- Younger age (<b>p&lt;0.001</b>)</li> <li>- Sensory deficits as a presenting symptom (<b>p=0.006</b>)</li> <li>- Surgical approach (p=NS)</li> </ul> | <ul style="list-style-type: none"> <li>- Worse preoperative functional status (<b>p&lt;0.001</b>)</li> <li>- Care-provider dependent patient (<b>p&lt;0.001</b>)</li> <li>- Older age (<b>p&lt;0.001</b>)</li> <li>- Motor deficits, bladder or gait dysfunction (<b>p&lt;0.001, p&lt;0.001 and p=0.048</b>)</li> <li>- Higher WHO grade (<b>p=0.023</b>)</li> <li>- Higher mortality-morbidity index (<b>p&lt;0.001</b>)</li> <li>- Surgical delay more than 30 or 90 days (<b>p=0.009</b> and p=NS)</li> <li>- Male sex (p=NS)</li> </ul> |                                                                                                                                                                                                                                                                                                                                                                    |
| Kobayashi 2021            | Absence of calcification ( <b>p&lt;0.05</b> )                                                                                                                                                |                                                                                                                                                                                                                                                                                                                                                                                                                                                                                                                                             |                                                                                                                                                                                                                                                                                                                                                                    |
| Tominaga 2021             | - Simpson grade 1 resection (vs. dura preservation technique) (p=NS)                                                                                                                         | - Simpson grade 1 resection (vs. dura preservation technique) (p=NS)                                                                                                                                                                                                                                                                                                                                                                                                                                                                        |                                                                                                                                                                                                                                                                                                                                                                    |
| Pettersson-Segerlind 2021 | <ul style="list-style-type: none"> <li>- Larger tumor area (<b>p=0.03</b>)</li> <li>- Greater spinal cord compression (<b>p&lt;0.001</b>)</li> </ul>                                         |                                                                                                                                                                                                                                                                                                                                                                                                                                                                                                                                             | <ul style="list-style-type: none"> <li>- Longer wait time before elective surgery (<b>p=0.005</b>)</li> <li>- Older age (p=NS)</li> <li>- Male sex (p=NS)</li> <li>- Higher ASA class (p=NS)</li> <li>- Craniocaudal location (cervical) (p=NS)</li> <li>- Ventral attachment (p=NS)</li> <li>- MIB-index (p=NS)</li> <li>- Higher Simpson grade (p=NS)</li> </ul> |

|                |                                                                                                                                                                  |                                                                                                                                                                                                                                                                                                                                                                                                                                                                     |                                                                                                                                                                     |
|----------------|------------------------------------------------------------------------------------------------------------------------------------------------------------------|---------------------------------------------------------------------------------------------------------------------------------------------------------------------------------------------------------------------------------------------------------------------------------------------------------------------------------------------------------------------------------------------------------------------------------------------------------------------|---------------------------------------------------------------------------------------------------------------------------------------------------------------------|
| Corell 2021    | <ul style="list-style-type: none"> <li>- Greater tumor occupancy (&gt;65% vs. ≤65%) (<b>p&lt;0.01</b>)</li> <li>- Less spinal cord compression (p=NS)</li> </ul> |                                                                                                                                                                                                                                                                                                                                                                                                                                                                     | <ul style="list-style-type: none"> <li>- Smaller tumor occupancy (p=NS)</li> <li>- Greater spinal cord compression (p=NS)</li> </ul>                                |
| Baro 2021      |                                                                                                                                                                  | <ul style="list-style-type: none"> <li>- Greater tumor occupancy (<b>p=0.005</b>)</li> <li>- Higher intensity preoperative T2 cord signal changes (<b>p&lt;0.05</b>)</li> <li>- Worse preoperative neurological function (p=NS)</li> <li>- Poor postoperative cord re-expansion (p=NS)</li> </ul>                                                                                                                                                                   |                                                                                                                                                                     |
| Kilinc 2021    |                                                                                                                                                                  | <ul style="list-style-type: none"> <li>- Obesity (<b>p=0.05</b>)</li> <li>- Simpson grade ≥IV (<b>p&lt;0.001</b>)</li> <li>- ASA class (<b>p=0.002</b>)</li> <li>- Craniocaudal location (lumbar) (<b>p&lt;0.002</b>)</li> <li>- Previous surgery (<b>p=0.01</b>)</li> <li>- Revision surgery (<b>p=0.03</b>)</li> <li>- Male sex (<b>p=0.03</b>)</li> <li>- Older Age (<b>p=0.002</b>)</li> <li>- Tumor recurrence (<b>p=0.05</b>)</li> </ul>                      |                                                                                                                                                                     |
| Davarski 2021  |                                                                                                                                                                  | <ul style="list-style-type: none"> <li>- Worse neurological function (<b>p=0.026</b>)</li> <li>- Presence of bladder and/or bowel dysfunction (<b>p=0.009</b>)</li> <li>- Higher age (p=NS)</li> <li>- Duration of symptoms (p=NS)</li> <li>- Craniocaudal tumor location (p=NS)</li> <li>- Ventral dural attachment (p=NS)</li> <li>- Number of segments involved (p=NS)</li> <li>- Presence of calcification (p=NS)</li> <li>- Higher WHO grade (p=NS)</li> </ul> |                                                                                                                                                                     |
| Kobayashi 2021 |                                                                                                                                                                  |                                                                                                                                                                                                                                                                                                                                                                                                                                                                     | <ul style="list-style-type: none"> <li>- Longer duration of symptoms (<b>p=0.041</b>)</li> <li>- Worse preoperative functional function (<b>p=0.024</b>)</li> </ul> |

|                  |                                                                                                                                                                                                                                                                                                                                                                                   |                                                                                                                                                                                                                                                                                                                                                                                                                                                            |                                                                                                                                                                                                                                                                                                                                           |
|------------------|-----------------------------------------------------------------------------------------------------------------------------------------------------------------------------------------------------------------------------------------------------------------------------------------------------------------------------------------------------------------------------------|------------------------------------------------------------------------------------------------------------------------------------------------------------------------------------------------------------------------------------------------------------------------------------------------------------------------------------------------------------------------------------------------------------------------------------------------------------|-------------------------------------------------------------------------------------------------------------------------------------------------------------------------------------------------------------------------------------------------------------------------------------------------------------------------------------------|
|                  |                                                                                                                                                                                                                                                                                                                                                                                   |                                                                                                                                                                                                                                                                                                                                                                                                                                                            | <ul style="list-style-type: none"> <li>- Older age (&gt;50 y. vs. &lt;50 y.) (p=NS)</li> <li>- Male sex (p=NS)</li> <li>- Craniocaudal tumor location (p=NS)</li> <li>- Axial tumor location (p=NS)</li> <li>- Presence/Absence of dural tail (p=NS)</li> <li>- Higher WHO grade (p=NS)</li> <li>- Higher Simpson grade (p=NS)</li> </ul> |
| Wach 2021        |                                                                                                                                                                                                                                                                                                                                                                                   | <ul style="list-style-type: none"> <li>- Older age (<b>p&lt;0.001</b>)</li> <li>- Longer symptom duration (<b>p=0.005</b>)</li> <li>- Presence of myelomalacia (<b>p&lt;0.001</b>)</li> <li>- Presence of dural tail sign (<b>p=0.02</b>)</li> <li>- Number of segments involved (p=NS)</li> <li>- Ventral dural attachment (p=NS)</li> <li>- Higher Simpson grade (p=NS)</li> <li>- Higher WHO grade (p=NS)</li> <li>- Higher MIB-index (p=NS)</li> </ul> | <ul style="list-style-type: none"> <li>- Older age (<b>p=0.027</b>)</li> </ul>                                                                                                                                                                                                                                                            |
| Kwee 2020        | <ul style="list-style-type: none"> <li>- Positive history of cardiovascular disease (<b>p=0.017</b>)</li> <li>- Surgery after 2009 (the year of the introduction of intraoperative monitoring) (<b>p=0.037</b>)</li> <li>- Younger age (p=NS)</li> <li>- Better preoperative neurological function (p=NS)</li> <li>- Surgical treatment (vs. observation alone) (p=NS)</li> </ul> | <ul style="list-style-type: none"> <li>- Male sex (<b>p=0.003</b>)</li> <li>- Higher WHO grade (2) (<b>p=0.013</b>)</li> <li>- Presenting symptoms (p=NS)</li> <li>- Perioperative complication (p=NS)</li> <li>- Greater tumor size (p=NS)</li> <li>- Positive history of malignancy (p=NS)</li> </ul>                                                                                                                                                    |                                                                                                                                                                                                                                                                                                                                           |
| Hohenberger 2020 |                                                                                                                                                                                                                                                                                                                                                                                   | <ul style="list-style-type: none"> <li>- Use of intraoperative monitoring (p=NS)</li> </ul>                                                                                                                                                                                                                                                                                                                                                                |                                                                                                                                                                                                                                                                                                                                           |
| Hua 2018         |                                                                                                                                                                                                                                                                                                                                                                                   | <ul style="list-style-type: none"> <li>- Recurrent tumor (<b>p=0.006</b>)</li> <li>- Higher WHO grade (<b>p&lt;0.001</b>)</li> <li>- Worse preoperative neurological functions (<b>p&lt;0.001</b>)</li> <li>- More segments involved (<b>p=0.034</b>)</li> </ul>                                                                                                                                                                                           | <ul style="list-style-type: none"> <li>- Recurrent tumor (<b>p&lt;0.001</b>)</li> <li>- Worse preoperative neurological functions (<b>p&lt;0.001</b>)</li> <li>- Higher tumor grade (<b>p=0.001</b>)</li> <li>- Higher tumor Ki-67 index (<b>p&lt;0.001</b>)</li> </ul>                                                                   |



|              |                                                                                                                                                                                                                                    |                                                                                                                                                                                                                                                                                                                                                                                                                                             |                                                                                                                                                                                                                                                                                                                                                                                                            |
|--------------|------------------------------------------------------------------------------------------------------------------------------------------------------------------------------------------------------------------------------------|---------------------------------------------------------------------------------------------------------------------------------------------------------------------------------------------------------------------------------------------------------------------------------------------------------------------------------------------------------------------------------------------------------------------------------------------|------------------------------------------------------------------------------------------------------------------------------------------------------------------------------------------------------------------------------------------------------------------------------------------------------------------------------------------------------------------------------------------------------------|
|              |                                                                                                                                                                                                                                    | <ul style="list-style-type: none"> <li>- Higher Ki-67 index (<b>p&lt;0.001</b>)</li> <li>- Older age (&gt;60 y. vs. &lt;60 y.) (p=NS)</li> <li>- Male sex (p=NS)</li> <li>- Craniocaudal tumor location (p=NS)</li> <li>- Ventral tumor attachment (p=NS)</li> <li>- Symptom duration (&lt;8 mos vs. ≥8mos) (p=NS)</li> <li>- Simpson grading (p=NS)</li> <li>- Progesterone receptor (PR) status (p=NS)</li> </ul>                         | <ul style="list-style-type: none"> <li>- Older age (&gt;60 y. vs. &lt;60 y.) (p=NS)</li> <li>- Male sex (p=NS)</li> <li>- Craniocaudal tumor location (p=NS)</li> <li>- Ventral dural attachment (p=NS)</li> <li>- More segments involved (p=NS)</li> <li>- Symptom duration (&lt;8 mos vs. ≥8mos) (p=NS)</li> <li>- Simpson grading (p=NS)</li> <li>- Progesterone receptor (PR) status (p=NS)</li> </ul> |
| Schwake 2018 |                                                                                                                                                                                                                                    | <ul style="list-style-type: none"> <li>- Older age (<b>p=0.001</b>)</li> <li>- Worse preoperative neurological function (<b>p=0.001</b>)</li> </ul>                                                                                                                                                                                                                                                                                         | <ul style="list-style-type: none"> <li>- Surgical approach (p=NS)</li> </ul>                                                                                                                                                                                                                                                                                                                               |
| Gilard 2018  |                                                                                                                                                                                                                                    |                                                                                                                                                                                                                                                                                                                                                                                                                                             | <ul style="list-style-type: none"> <li>- Ventral dural attachment (<b>p=0.03</b>)</li> <li>- Better preoperative neurological function (on both MMS and KPS) (<b>p=0.04</b>)</li> <li>- Higher WHO grade (<b>p&lt;0.01</b>)</li> <li>- Male sex (p=NS)</li> <li>- Older age (p=NS)</li> <li>- Clinical presentation (p=NS)</li> <li>- Longer symptom duration (p=NS)</li> </ul>                            |
| Raco 2017    | <ul style="list-style-type: none"> <li>- Paresthesia as a presenting symptom (<b>p=0.025</b>)</li> <li>- Tumors with no anterior attachments (<b>p=0.016</b>)</li> <li>- Year operated (1992-2011 vs. 1976-1991) (p=NS)</li> </ul> | <ul style="list-style-type: none"> <li>- Ventral dural attachment (<b>p=0.21</b>)</li> <li>- Sphincter disturbance as a presenting symptom (<b>p=0.006</b>)</li> <li>- Higher Simpson grade (II and III) (<b>p=0.04</b>)</li> <li>- Worse preoperative neurological function (<b>p=0.01</b>)</li> <li>- Ventral (AND) recurrent tumors (<b>p=0.003</b>)</li> <li>- Higher SPES (<b>p=0.001</b>)</li> <li>- Dumbbell tumor (p=NS)</li> </ul> | <ul style="list-style-type: none"> <li>- Operation of recurrent lesions (<b>p=0.003</b>)</li> <li>- Longer duration of symptoms (<b>p=0.05</b>)</li> <li>- Perioperative complications (p=NS)</li> </ul>                                                                                                                                                                                                   |

|                   |  |                                                                                                                                                                                                                                                                                                                                                                                                                                                                                                                                                                                                                                                                                                                                                                                                                   |                                                                                                                                                              |
|-------------------|--|-------------------------------------------------------------------------------------------------------------------------------------------------------------------------------------------------------------------------------------------------------------------------------------------------------------------------------------------------------------------------------------------------------------------------------------------------------------------------------------------------------------------------------------------------------------------------------------------------------------------------------------------------------------------------------------------------------------------------------------------------------------------------------------------------------------------|--------------------------------------------------------------------------------------------------------------------------------------------------------------|
| Zham 2016         |  | <ul style="list-style-type: none"> <li>- Craniocaudal location (cervical) (<b>p=0.027</b>)</li> <li>- Adhesion during surgery and incomplete removal of tumor (<b>p=0.012</b>)</li> <li>- Psammomatous histological subtype (<b>p=0.003</b>)</li> <li>- Higher WHO grade (<b>p=0.026</b>)</li> <li>- Tumor size (p=NS)</li> <li>- Older age (p=NS)</li> <li>- Male sex (p=NS)</li> </ul>                                                                                                                                                                                                                                                                                                                                                                                                                          |                                                                                                                                                              |
| Maiti 2016        |  | <ul style="list-style-type: none"> <li>- Ventral dural attachment (<b>p=0.003</b>)</li> <li>- Greater tumor size (occupying <math>\geq 75\%</math> vs. <math>&lt; 75\%</math> of the spinal canal) (<b>p=0.02</b>)</li> <li>- Presence of T2 signal intensity changes of spinal cord (<b>p=0.022</b>)</li> <li>- Worse preoperative neurological functions (<b>p=0.003</b>)</li> <li>- Male sex (p=NS)</li> <li>- Older age (<math>&lt; 50</math> y. vs. <math>&gt; 50</math> y.) (p=NS)</li> <li>- Race (Caucasian vs African American) (p=NS)</li> <li>- Association with NF2 (p=NS)</li> <li>- Higher WHO grade (p=NS)</li> <li>- Craniocaudal location (p=NS)</li> <li>- Number of segments involved (<math>\leq 2</math> vs. <math>&gt; 3</math>) (p=NS)</li> <li>- Presence of dural tail (p=NS)</li> </ul> |                                                                                                                                                              |
| Sandalcioglu 2008 |  |                                                                                                                                                                                                                                                                                                                                                                                                                                                                                                                                                                                                                                                                                                                                                                                                                   | <ul style="list-style-type: none"> <li>- Calcification (<b>p&lt;0.0001</b>)</li> <li>- Ventral dural attachment (p=NS)</li> <li>- Male sex (p=NS)</li> </ul> |
| Yoon 2007         |  | - Craniocaudal tumor location (p=NS)                                                                                                                                                                                                                                                                                                                                                                                                                                                                                                                                                                                                                                                                                                                                                                              |                                                                                                                                                              |

|               |                                                                                                                                                                                                   |                                                                                                                                                                                                                                                                                                                                       |                                                                                                                                                                       |
|---------------|---------------------------------------------------------------------------------------------------------------------------------------------------------------------------------------------------|---------------------------------------------------------------------------------------------------------------------------------------------------------------------------------------------------------------------------------------------------------------------------------------------------------------------------------------|-----------------------------------------------------------------------------------------------------------------------------------------------------------------------|
| Setzer 2007   |                                                                                                                                                                                                   | <ul style="list-style-type: none"> <li>- En plaque growth (<b>p&lt;0.03</b>)</li> <li>- Higher Simpson grade (<b>p&lt;0.006</b>)</li> <li>- Worse preoperative neurological function (<b>p&lt;0.006</b>)</li> <li>- Higher WHO grade (<b>p&lt;0.012</b>)</li> <li>- Invasion of the arachnoid/pia mater (<b>p&lt;0.03</b>)</li> </ul> | <ul style="list-style-type: none"> <li>- Invasion of the arachnoid/pia mater (<b>p&lt;0.03</b>)</li> <li>- Longer duration of symptoms (<b>p&lt;0.001</b>)</li> </ul> |
| Schaller 2005 | <ul style="list-style-type: none"> <li>- Histological subtype (not psammomatous vs. psammomatous) (<b>p&lt;0.05</b>)</li> <li>- Smaller tumor size (p=NS)</li> <li>- Female sex (p=NS)</li> </ul> |                                                                                                                                                                                                                                                                                                                                       |                                                                                                                                                                       |
| Morandi 2004  |                                                                                                                                                                                                   | <ul style="list-style-type: none"> <li>- Worse preoperative neurological function (p=NS)</li> </ul>                                                                                                                                                                                                                                   |                                                                                                                                                                       |

*The p-value of significant correlations were marked in bold character, NS = Not Significant, WHO = World Health Organization*

**Table S14.** Recurrence rate and markers of recurrence

| Study ID                  | Number of tumors operated | Mean follow-up time (mos)     | Number of recurrences | Recurrence rate | Mean time to recurrence | Range of recurrence time | Recurrence markers (p-value)                                                                                                                                                                                                                                                                                                                        |
|---------------------------|---------------------------|-------------------------------|-----------------------|-----------------|-------------------------|--------------------------|-----------------------------------------------------------------------------------------------------------------------------------------------------------------------------------------------------------------------------------------------------------------------------------------------------------------------------------------------------|
| Saiwai 2021               | 38                        | 121.5 ± 9.0                   | 3                     | 7.89%           | 17.6 ± 51.2             | 59–153                   | - Dura preservation technique (Saito method) vs. Simpson grade 2 (p=NS)                                                                                                                                                                                                                                                                             |
| Wach 2021                 | 80                        | 28.8                          | 2                     | 2.50%           | 18                      | 12-24                    | - Higher MIB-1 labeling index (≥5% vs. <5%) ( <b>p&lt;0.05</b> )                                                                                                                                                                                                                                                                                    |
| Tominaga 2021             | 29                        | Median: 132, (IQR: 120–160.5) | 3                     | 10.34%          | median: 95              |                          | - Higher Simpson grade ( <b>p&lt;0.05</b> )                                                                                                                                                                                                                                                                                                         |
| Pettersson-Segerlind 2021 | 129                       | 98.4                          | 6                     | 4.65%           | 48.9 ± 30               | 4-85.2                   | - Higher WHO grade (p=NS)<br>- Younger age (p=NS)                                                                                                                                                                                                                                                                                                   |
| Kobayashi 2021            | 116                       | 84.8 ± 52.7                   | 8                     | 6.90%           | 72.9                    | 24-115                   | - Male sex ( <b>p=0.018</b> )<br>- Presence of dural tail ( <b>p=0.046</b> )<br>- Higher Simpson grade ( <b>p&lt; 0.01</b> )<br>- Younger age (p=NS)<br>- Craniocaudal tumor location (p=NS)<br>- Axial tumor location (p=NS)<br>- Longer duration of symptoms (p=NS)<br>- Worse preoperative functional scores (p=NS)<br>- Higher WHO grade (p=NS) |
| Krauss 2021               | 17                        | 95.3                          | 8                     | 47.06%          | 37.1 ± 24               | 12-78                    | - Male sex ( <b>p=0.03</b> )<br>- Craniocaudal tumor location (not thoracic vs thoracic) ( <b>p=0.001</b> )<br>- Younger age (p=NS)<br>- Larger tumor size (p=NS)<br>- Pain at presentation (p=NS)<br>- Sensory deficits at presentation (p=NS)<br>- Motor deficits at presentation (p=NS)<br>- Bladder and bowel dysfunction at presentation       |

|               |     |              |    |        |             |        |                                                                                                                                                                                                                                                                                                                                      |
|---------------|-----|--------------|----|--------|-------------|--------|--------------------------------------------------------------------------------------------------------------------------------------------------------------------------------------------------------------------------------------------------------------------------------------------------------------------------------------|
|               |     |              |    |        |             |        | (p=NS)<br>- Higher Simpson grade (p=NS)                                                                                                                                                                                                                                                                                              |
| Kilinc 2021   | 119 | 25.4 ± 37.1  | 9  | 7.56%  | 120.1       | 12-348 | - Presence of calcification ( <b>p=0.006</b> )<br>- Simpson grade ≥ 4 ( <b>p&lt;0.001</b> )<br>- Ventral dural attachment<br>- Craniocaudal location (p=NS)<br>- Number of spinal segments involved (p=NS)<br>- Obesity (p=NS)<br>- Diabetes (p=NS)<br>- Hypertension (p=NS)<br>- Surgeon experience (p=NS)                          |
| Ampie 2021    | 46  | Median: 53   | 1  | 2.17%  | 1           | n/a    |                                                                                                                                                                                                                                                                                                                                      |
| Davarski 2021 | 31  | 43           | 1  | 3.23%  | 48          | n/a    |                                                                                                                                                                                                                                                                                                                                      |
| Corell 2021   | 111 | 107 ± 108    | 3  | 2.70%  | 71.7 ± 60   | 11-131 |                                                                                                                                                                                                                                                                                                                                      |
| Baro 2021     | 90  | Median: 19   | 2  | 2.22%  |             |        |                                                                                                                                                                                                                                                                                                                                      |
| Aoyama 2021   | 15  | > 60         | 0  | 0.00%  |             |        |                                                                                                                                                                                                                                                                                                                                      |
| Maiuri 2020   | 56  | median: 192  | 6  | 10.71% |             |        | - Higher MIB-1 labeling index ( <b>p=0.0001</b> )<br>- Arachnoid invasion ( <b>p=0.04</b> )<br>- Simpson grade 1 vs. 2 (p=NS)<br>- Younger age (p=NS)<br>- Male sex (p=NS)<br>- Craniocaudal location (p=NS)<br>- Degree of progesterone or estrogen receptor positivity (p=NS)<br>- Vascularity and consistency of the tumor (p=NS) |
| Han 2020      | 20  | 79.6 ± 39.9  | 7  | 35.00% | 80.9 ± 69.7 | 15-108 | - Higher WHO grade was associated with a shorter duration until recurrence ( <b>p&lt;0.01</b> )                                                                                                                                                                                                                                      |
| Kwee 2020     | 159 | Median: 9.24 | 12 | 7.55%  | 62.4 ± 52.8 |        | - Simpson grade 4 resection ( <b>p=0.008</b> )<br>- Younger age ( <b>p=0.006</b> )                                                                                                                                                                                                                                                   |

|                  |     |               |    |       |               |        |                                                                                                                                                                                                                                                                                                                                                                                                                                                                                                                                                                                                                                     |
|------------------|-----|---------------|----|-------|---------------|--------|-------------------------------------------------------------------------------------------------------------------------------------------------------------------------------------------------------------------------------------------------------------------------------------------------------------------------------------------------------------------------------------------------------------------------------------------------------------------------------------------------------------------------------------------------------------------------------------------------------------------------------------|
|                  |     |               |    |       |               |        | <ul style="list-style-type: none"> <li>- Bladder or bowel dysfunction as a presenting symptom (<b>p=0.029</b>)</li> <li>- Higher WHO grade (2) (p=NS)</li> <li>- Craniocaudal location (p=NS)</li> </ul>                                                                                                                                                                                                                                                                                                                                                                                                                            |
| Voldřich 2020    | 92  | 32 ± 44.1     | 4  | 4.35% | 106.5 ± 35.5  | 78-156 |                                                                                                                                                                                                                                                                                                                                                                                                                                                                                                                                                                                                                                     |
| Naito 2020       | 70  | 61            | 2  | 2.86% |               |        |                                                                                                                                                                                                                                                                                                                                                                                                                                                                                                                                                                                                                                     |
| Hohenberger 2020 | 45  | 34            | 0  | 0.00% |               |        |                                                                                                                                                                                                                                                                                                                                                                                                                                                                                                                                                                                                                                     |
| Yeo 2019         | 105 | 28            | 1  | 0.95% | 56            | n/a    |                                                                                                                                                                                                                                                                                                                                                                                                                                                                                                                                                                                                                                     |
| Noh 2019         | 13  | 68.94 ± 72.14 | 0  | 0.00% |               |        |                                                                                                                                                                                                                                                                                                                                                                                                                                                                                                                                                                                                                                     |
| Xu 2019          | 17  | 19.8          | 0  | 0.00% |               |        |                                                                                                                                                                                                                                                                                                                                                                                                                                                                                                                                                                                                                                     |
| Hua 2018         | 194 | 94.34 ± 29.49 | 9  | 4.64% | 36.22 ± 16.01 | 15–60  | <ul style="list-style-type: none"> <li>- Male sex (<b>p&lt; 0.001</b>)</li> <li>- Higher Simpson grade (<b>p&lt; 0.001</b>)</li> <li>- Higher WHO grade (<b>p&lt; 0.001</b>)</li> <li>- Recurrent tumors (<b>p&lt; 0.001</b>)</li> <li>- Age (&lt;60 y. vs. &gt;60 y.) (p=NS)</li> <li>- Simpson grade 2 vs 1 (p=NS)</li> <li>- Craniocaudal tumor location (p=NS)</li> <li>- Number of segments involved (1 vs. ≥2) (p=NS)</li> <li>- Axial tumor location (p=NS)</li> <li>- Worse preoperative functional scores (p=NS)</li> <li>- MIB index (&lt;3 vs. ≥3) (p=NS)</li> <li>- Progesterone receptor (PR) status (p=NS)</li> </ul> |
| Schwake 2018     | 84  | 19 ± 5.16     | 1  | 1.19% | 40            | n/a    |                                                                                                                                                                                                                                                                                                                                                                                                                                                                                                                                                                                                                                     |
| Onken 2018       | 207 | 14            | 10 | 4.83% | Median: 156   |        |                                                                                                                                                                                                                                                                                                                                                                                                                                                                                                                                                                                                                                     |
| Gilard 2018      | 87  | 92.4 ± 51.9   | 6  | 6.90% |               |        |                                                                                                                                                                                                                                                                                                                                                                                                                                                                                                                                                                                                                                     |
| Raco 2017        | 173 | 50.8 ± 9.3    | 4  | 2.31% | 30 ± 36.2     | 1-76   | <ul style="list-style-type: none"> <li>- Higher Simpson grade (<b>p=0.043</b>)</li> <li>- Higher WHO grade (<b>p=0.002</b>)</li> </ul>                                                                                                                                                                                                                                                                                                                                                                                                                                                                                              |

|              |    |             |    |        |              |           |                                                                                                                                                                                                                                                                                                                                                                                                                                                                                                                                                                                                                                                                                                                  |
|--------------|----|-------------|----|--------|--------------|-----------|------------------------------------------------------------------------------------------------------------------------------------------------------------------------------------------------------------------------------------------------------------------------------------------------------------------------------------------------------------------------------------------------------------------------------------------------------------------------------------------------------------------------------------------------------------------------------------------------------------------------------------------------------------------------------------------------------------------|
| Notani 2017  | 12 | 55.4        | 1  | 8.33%  | 132          | n/a       |                                                                                                                                                                                                                                                                                                                                                                                                                                                                                                                                                                                                                                                                                                                  |
| Wu 2017      | 14 | 66.1        | 4  | 28.57% | 25 ± 23      | 12-60     |                                                                                                                                                                                                                                                                                                                                                                                                                                                                                                                                                                                                                                                                                                                  |
| Maiti 2016   | 37 | 51.2 ± 22.4 | 4  | 10.81% | 39.75 ± 18.6 | 19-64     | <ul style="list-style-type: none"> <li>- Male sex (<b>p&lt;0.001</b>)</li> <li>- Presence of dural tail (<b>p=0.04</b>)</li> <li>- Age (&lt;50 y. vs. &gt;50 y.) (p=NS)</li> <li>- Race (Caucasian vs African American) (p=NS)</li> <li>- Association w/ NF2 (p=NS)</li> <li>- Higher WHO grade (p=NS)</li> <li>- Craniocaudal location (p=NS)</li> <li>- Number of segments involved (≤2 vs. &gt;3) (p=NS)</li> <li>- Ventral dural attachment (p=NS)</li> <li>- Tumor size (occupying ≥75% vs. &lt;75% of the spinal canal) (p=NS)</li> <li>- T2 signal intensity changes of spinal cord (p=NS)</li> </ul>                                                                                                     |
| Ye 2016      | 25 | 50.6 ± 38.2 | 13 | 52.00% | 23.5 ± 22    | 3-65      | <ul style="list-style-type: none"> <li>- Ventral dural attachment (<b>p=0.012</b>)</li> <li>- Number of involved segments (<b>p=0.002</b>)</li> <li>- Higher Simpson grade (<b>p=0.034</b>)</li> <li>- Male sex (p=NS)</li> <li>- Younger age (p=NS)</li> <li>- Longer duration of symptoms (p=NS)</li> <li>- Worse preoperative neurological function (p=NS)</li> <li>- Craniocaudal tumor location (p=NS)</li> <li>- Tumor site (intradural vs. extradural) (p=NS)</li> <li>- Larger tumor size (p=NS)</li> <li>- Higher WHO grade (II vs. III) (p=NS)</li> <li>- Presence of cord invasion (p=NS)</li> <li>- Presence of osteolytic destruction (p=NS)</li> <li>- Presence of calcification (p=NS)</li> </ul> |
| Pompili 2016 | 29 | 72          | 1  | 3.45%  | 48           | n/a       |                                                                                                                                                                                                                                                                                                                                                                                                                                                                                                                                                                                                                                                                                                                  |
| Kim 2016     | 73 | 111.5       | 9  | 12.33% | 82 ± 70      | 3.6-196.2 |                                                                                                                                                                                                                                                                                                                                                                                                                                                                                                                                                                                                                                                                                                                  |

|                   |     |                                                       |    |        |          |         |                                                                                                                               |
|-------------------|-----|-------------------------------------------------------|----|--------|----------|---------|-------------------------------------------------------------------------------------------------------------------------------|
| Tola 2016         | 20  | 40 ± 32                                               | 0  | 0.00%  |          |         |                                                                                                                               |
| Lonjon 2016       | 23  | 40 ± 26.5                                             | 4  | 17.39% |          |         |                                                                                                                               |
| Sun 2015          | 20  | median: 34                                            | 1  | 5.00%  | 74       | n/a     | - Higher Simpson grade ( <b>p=0.025</b> )                                                                                     |
| Aboul-Enein 2015  | 16  | 51.6                                                  | 4  | 25.00% | 56 ± 18  | 36-72   |                                                                                                                               |
| Haq 2015          | 48  | 24                                                    | 6  | 12.50% |          |         |                                                                                                                               |
| Tsuda 2014        | 13  | 124.8                                                 | 3  | 23.08% | 12.1     |         |                                                                                                                               |
| Arima 2014        | 23  | 32.1                                                  | 3  | 13.04% |          |         |                                                                                                                               |
| Riad 2013         | 15  | 99                                                    | 1  | 6.67%  | 96       | n/a     |                                                                                                                               |
| Nakamura 2012     | 68  | 145.2                                                 | 12 | 17.65% | 104 ± 68 | 18-252  | - Younger age ( <b>p&lt;0.05</b> )<br>- Higher Simpson grade ( <b>p&lt;0.0001</b> )<br>- Different histologic subtypes (p=NS) |
| Barresi 2012      | 58  | 78% of patients had a follow-up of at least 60 months | 1  | 1.72%  | 53       | n/a     |                                                                                                                               |
| Wang 2012         | 10  | 43                                                    | 7  | 70.00% | 14 ± 10  | 3-34    |                                                                                                                               |
| Postalci 2011     | 35  | 60                                                    | 8  | 22.86% |          |         |                                                                                                                               |
| Voulgaris 2010    | 10  | 26                                                    | 0  | 0.00%  |          |         |                                                                                                                               |
| Sacko 2009        | 102 | Median: 49.5                                          | 1  | 0.98%  | 48       | n/a     |                                                                                                                               |
| Sandalcioglu 2008 | 131 | 61                                                    | 4  | 3.05%  | 76.5     | 36-116  | - Ventral dural attachment (p=NS)                                                                                             |
| Schröder 2008     | 30  | 36                                                    | 3  | 10.00% | 33 ± 29  | 3-60    |                                                                                                                               |
| Boström 2008      | 61  | 31.3                                                  | 5  | 8.20%  | 36 ± 19  | 12-60   |                                                                                                                               |
| Setzer 2007       | 80  | 43.5 ± 24.8                                           | 8  | 10.00% | 56.6     | 9.5-132 | - Higher Simpson resection grade ( <b>p&lt;0.03</b> )<br>- Invasion of arachnoid/pia mater ( <b>p&lt;0.001</b> )              |



|                  |    |         |    |        |     |        |                                                                                                                                            |
|------------------|----|---------|----|--------|-----|--------|--------------------------------------------------------------------------------------------------------------------------------------------|
|                  |    |         |    |        |     |        | - Histological tumor type ( <b>p&lt;0.008</b> )<br>- Higher WHO grade ( <b>p&lt;0.001</b> )<br>- Younger patient age ( <b>p&lt;0.006</b> ) |
| Yoon 2007        | 38 | 78.8    | 6  | 15.79% | 100 | 12-204 |                                                                                                                                            |
| Schaller 2005    | 33 | 96 ± 48 | 1  | 3.03%  | 96  | n/a    |                                                                                                                                            |
| Haegelen 2005    | 33 | 70.7    | 0  | 0.00%  |     |        |                                                                                                                                            |
| Peker 2005       | 41 | 23.2    | 0  | 0.00%  |     |        |                                                                                                                                            |
| Morandi 2004     | 30 | 62.7    | 0  | 0.00%  |     |        |                                                                                                                                            |
| Cohen-Gadol 2003 | 80 | 85      | 11 | 13.75% |     |        | - Younger age ( <b>p&lt;0.05</b> )                                                                                                         |
| Gambardella 2003 | 10 | 41      | 0  | 0.00%  |     |        |                                                                                                                                            |
| Arslantas 2003   | 16 | 28.8    | 0  | 0.00%  |     |        |                                                                                                                                            |
| Schick 2001      | 81 | 51.6    | 7  | 8.64%  | 63  | 17-164 |                                                                                                                                            |
| Gezen 2000       | 36 | 108     | 2  | 5.56%  | 78  | 60-96  |                                                                                                                                            |

*The p-value of significant correlations were marked in bold character, NS = Not Significant, WHO = World Health Organization*

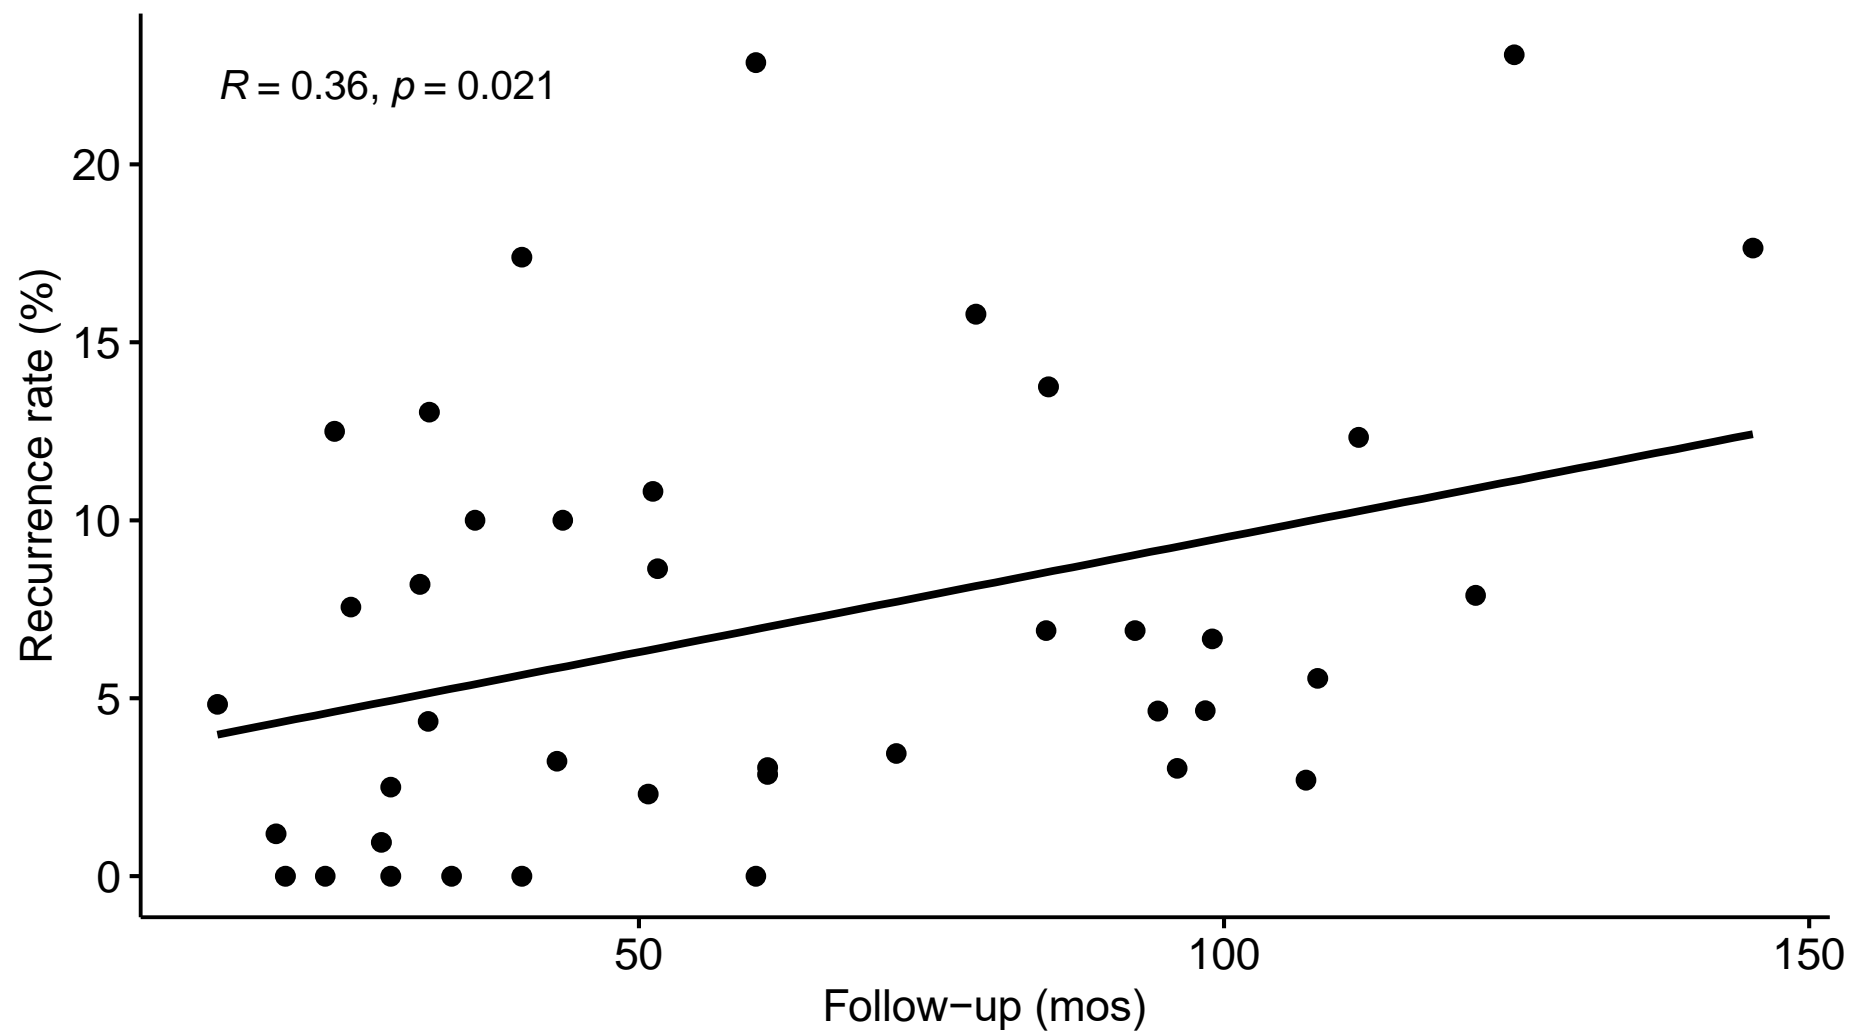

**Figure S1.** Association between the recurrence rate and the follow-up duration, with the associated Pearson correlation coefficient  $R$  and  $p$ -value.

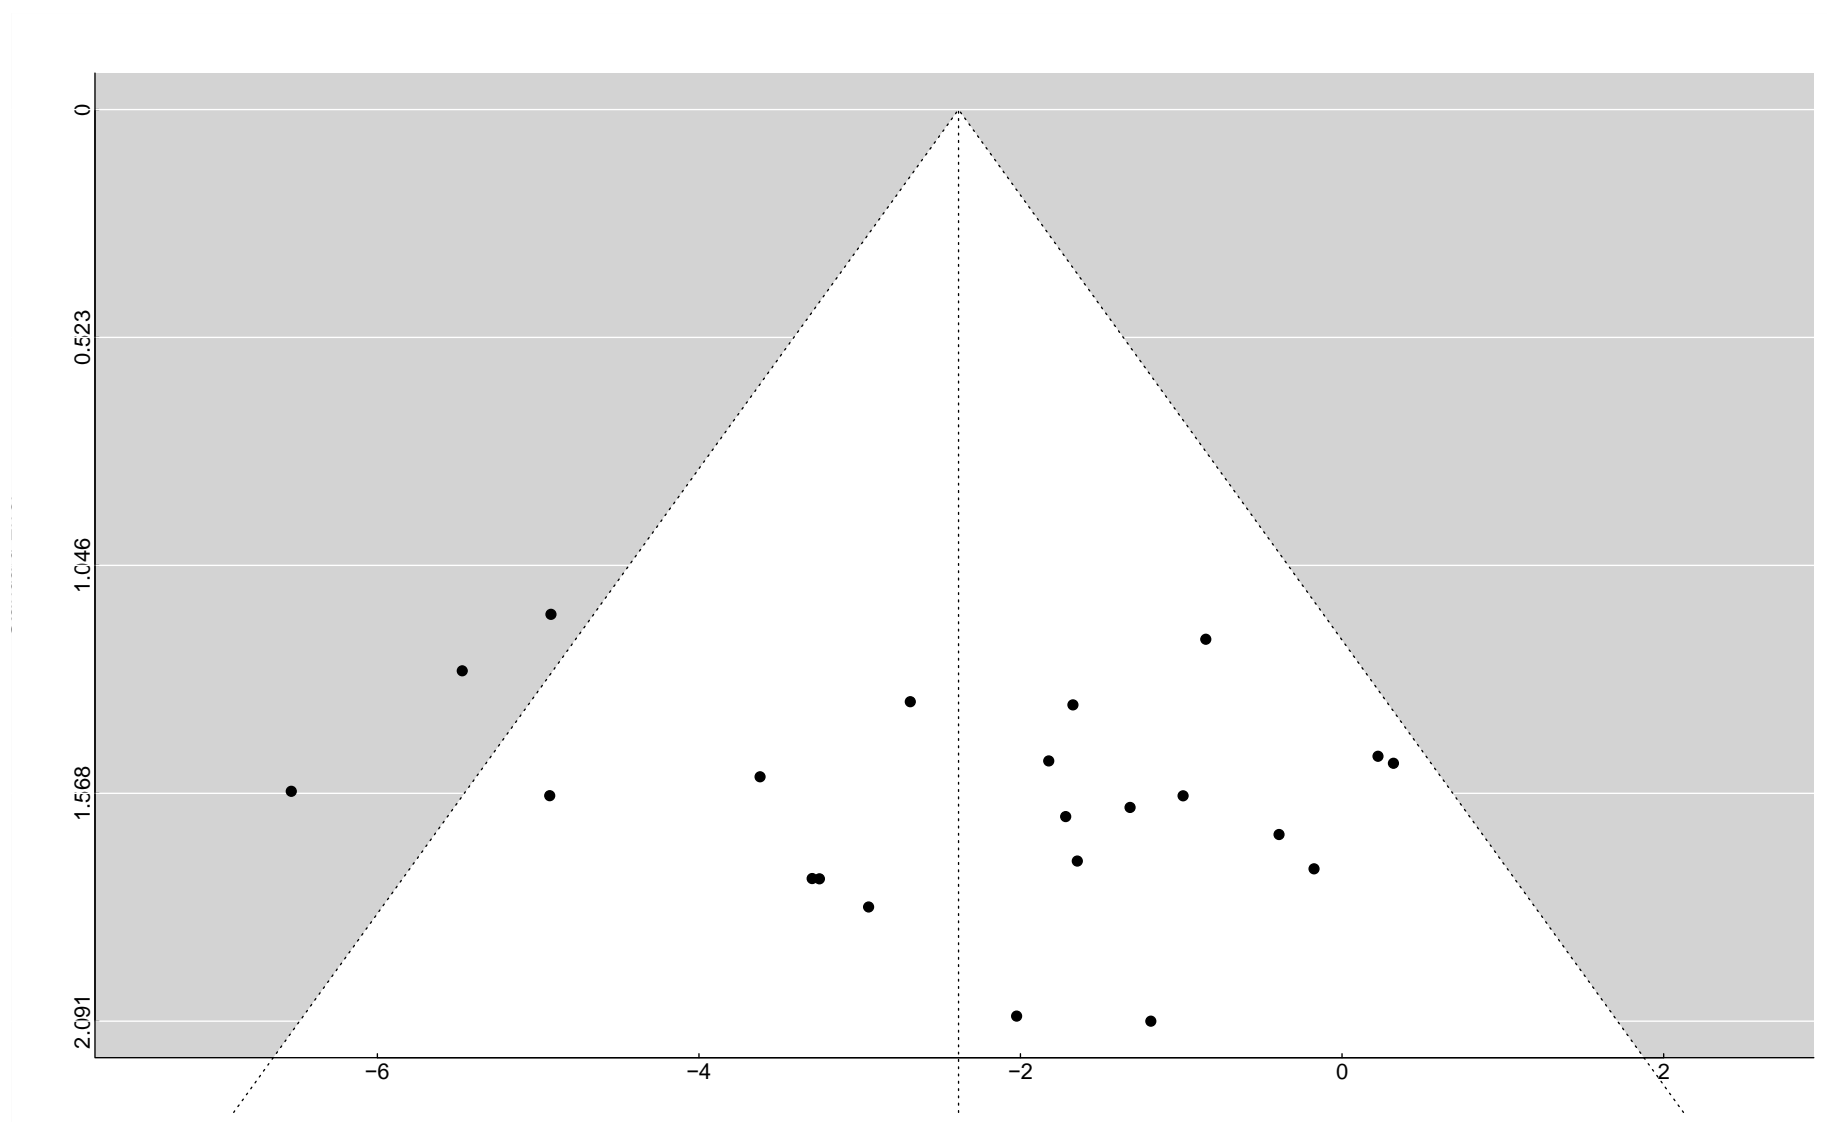

**Figure S2.** Funnel plot showing the distribution of studies comparing the recurrence rate among low vs. high WHO grade spinal meningiomas.

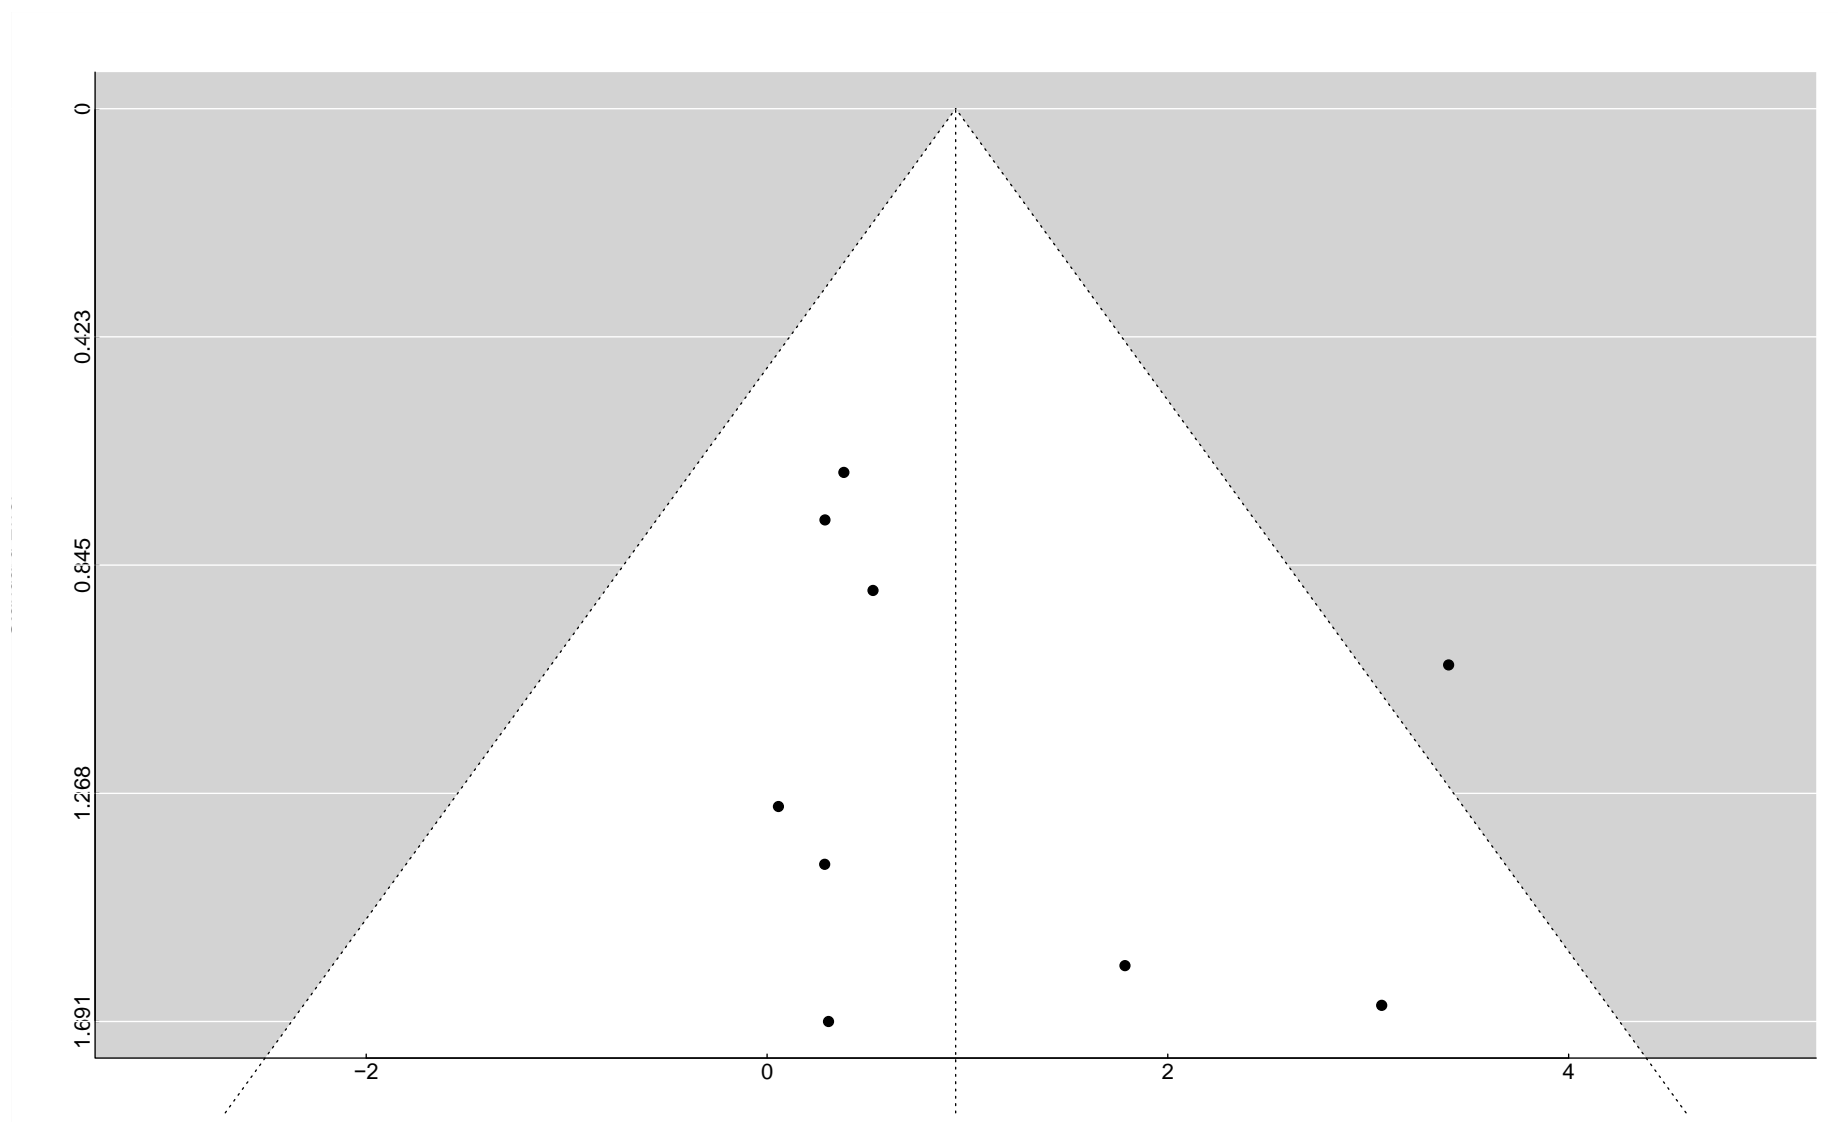

**Figure S3.** Funnel plot showing the distribution of studies comparing the recurrence rate among ventral vs. non-ventral spinal meningiomas.

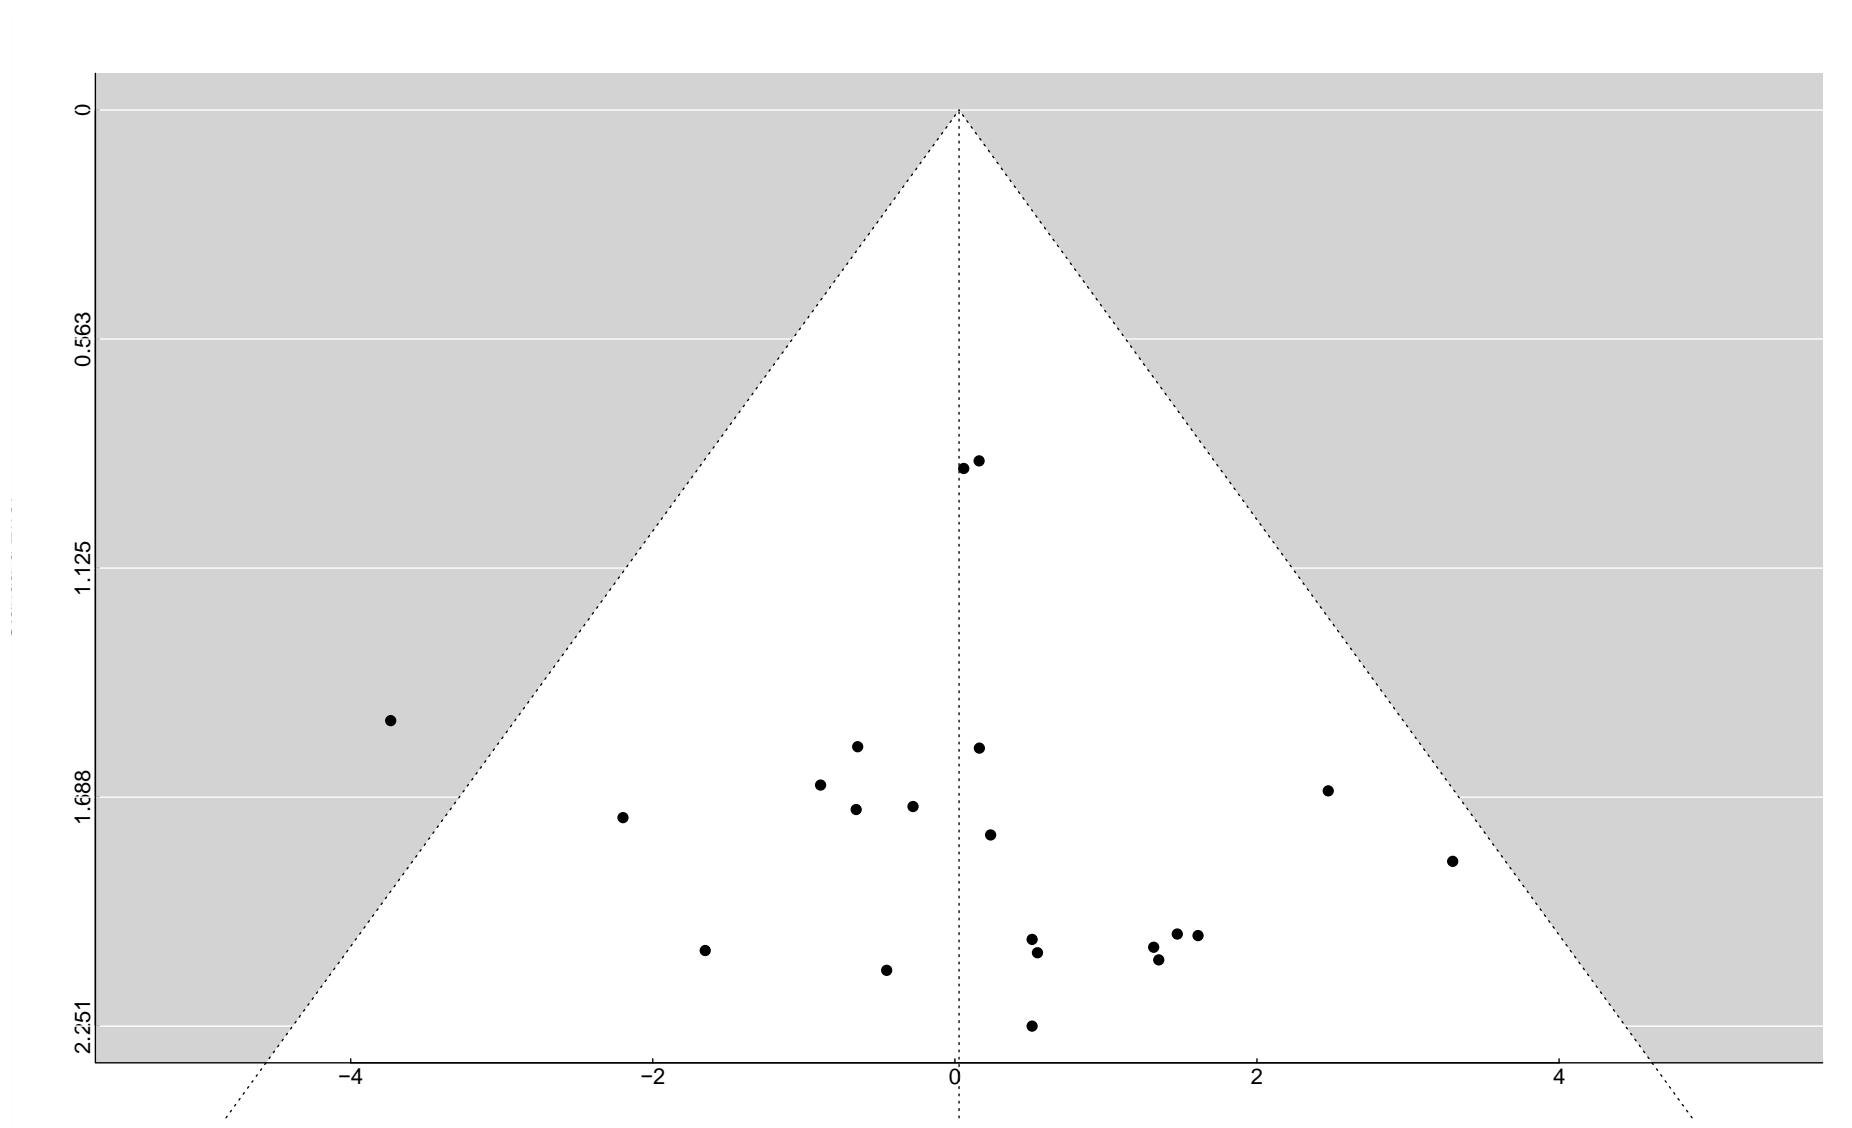

**Figure S4.** Funnel plot showing the distribution of studies comparing the recurrence rate spinal meningiomas operated with Simpson grade 1 vs. grade 2 resection.

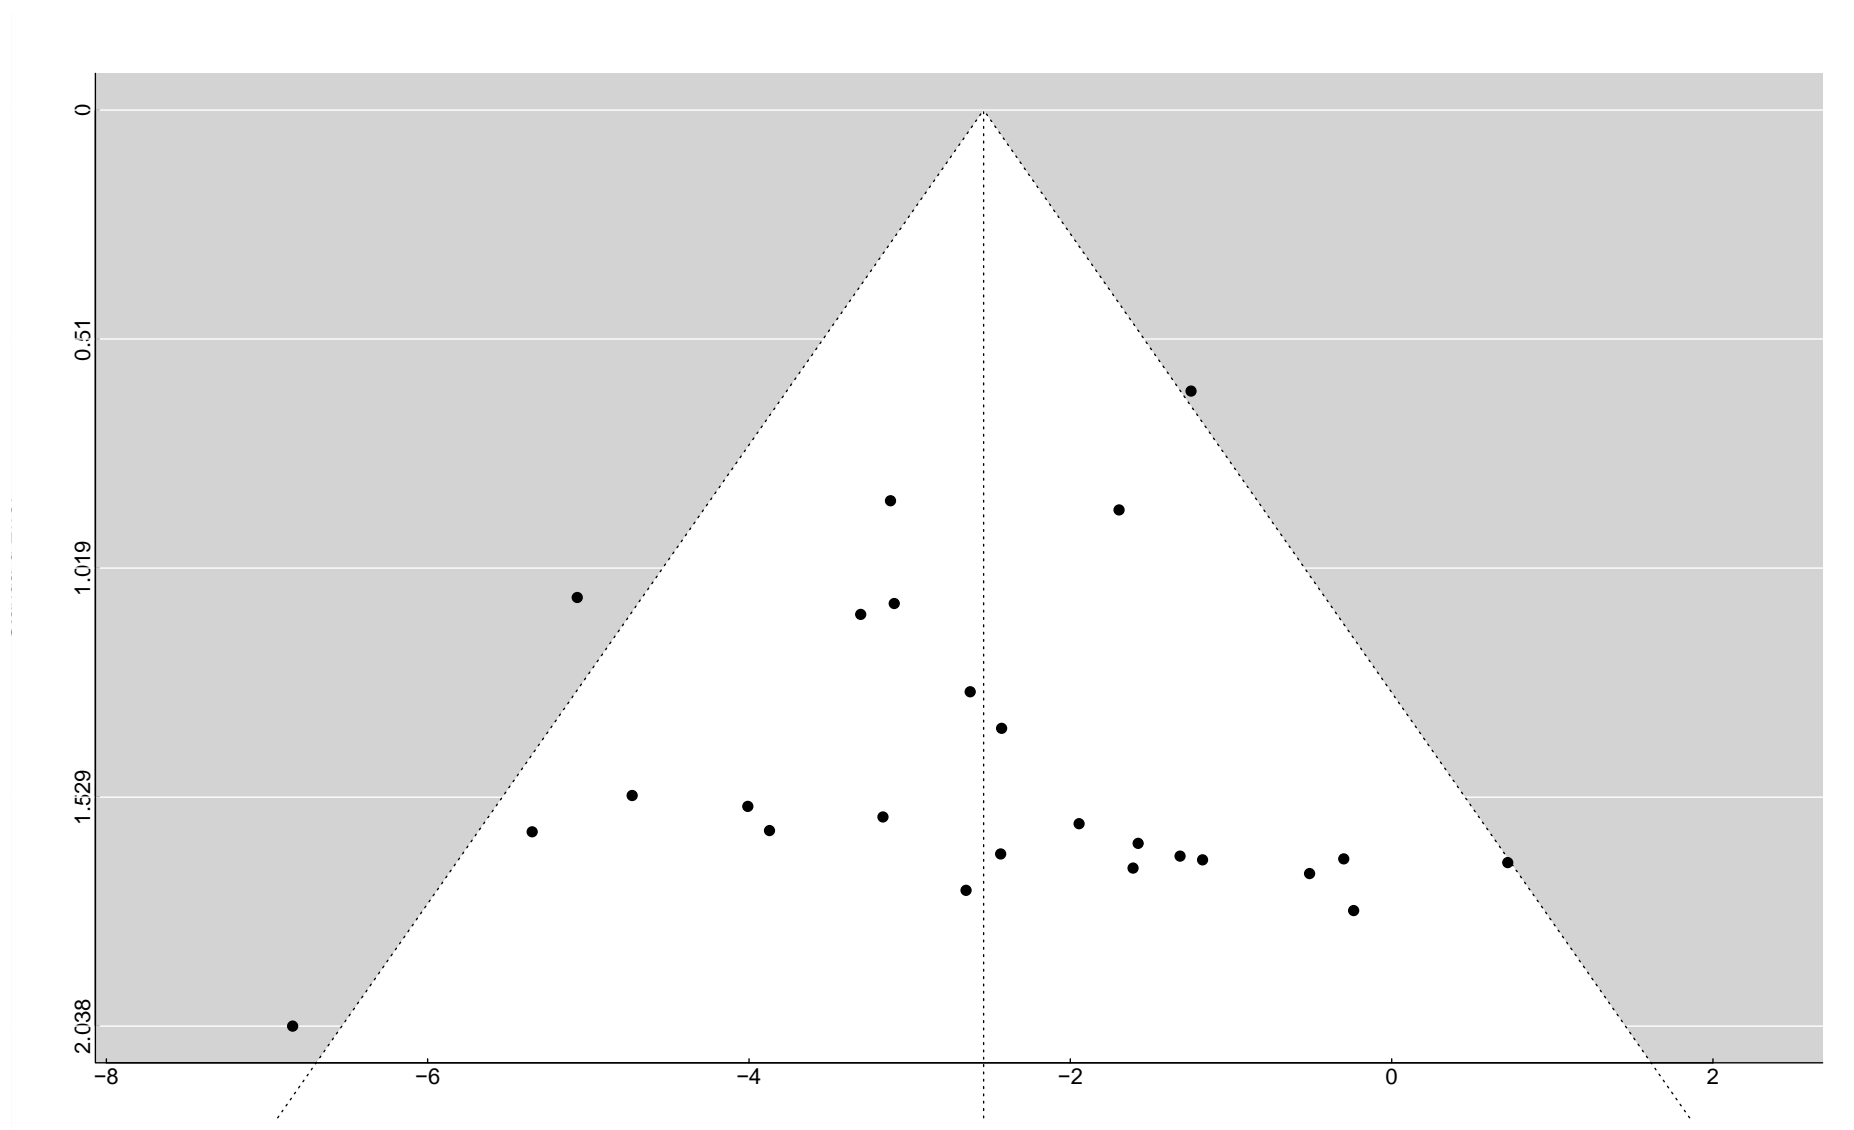

**Figure S5.** Funnel plot showing the distribution of studies comparing the recurrence rate spinal meningiomas operated with Simpson grade 1 and 2 vs. grade 3, 4, and 5 resections.
